# Supplementary material for: From metabarcoding to metaphylogeography: separating the wheat from the chaff
Source: PubMed Central journal article supplement — Ecol Appl. 2019 Dec 11;30(2):e02036. doi: 10.1002/eap.2036 (PMC7078904; doi:10.1002/eap.2036), 2019-12-11

**Supporting Information.** Xavier Turon, Adrià Antich, Creu Palacín, Kim Præbel, Owen Simon Wangenstein. 2019. From metabarcoding to metaphylogeography: separating the wheat from the chaff. *Ecological Applications*.

## Appendix S2

Network analyses of the MOTUs retained after denoising and filtering. The size of the pies is proportional to the semiquantitative rank abundances used. Blue color represent abundance in Mediterranean samples, red color in Atlantic samples. The code of the MOTU and the main group where they belong are indicated. For details on each MOTU, refer to Data S2. Only graphs for MOTUs with  $>2$  and  $< 230$  sequences are represented.

Figure S1. MBPA\_000000099 Rhodophyta

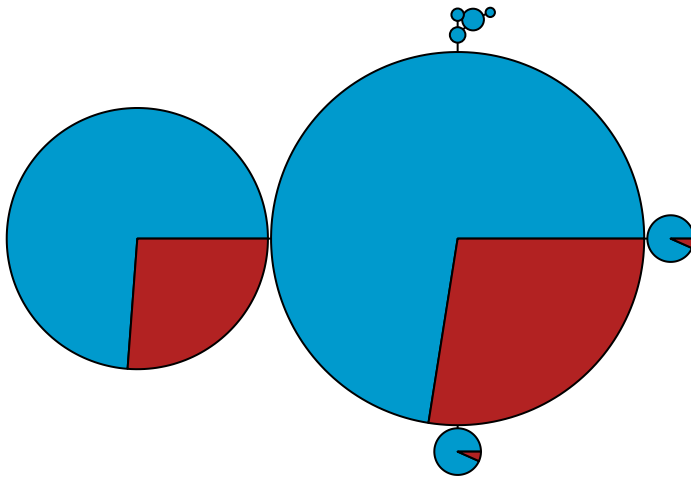

Figure S2. MBPA\_000000127 Metazoa

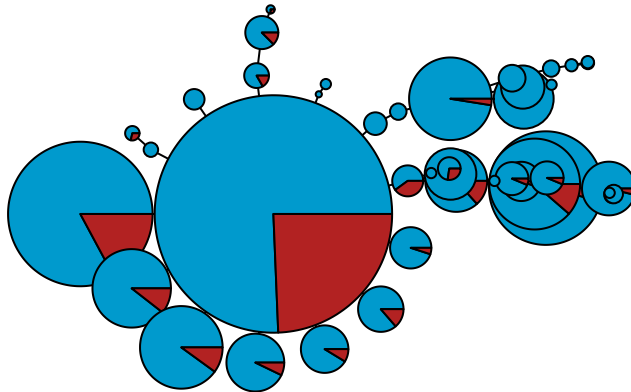

Figure S3. MBPA\_000000141

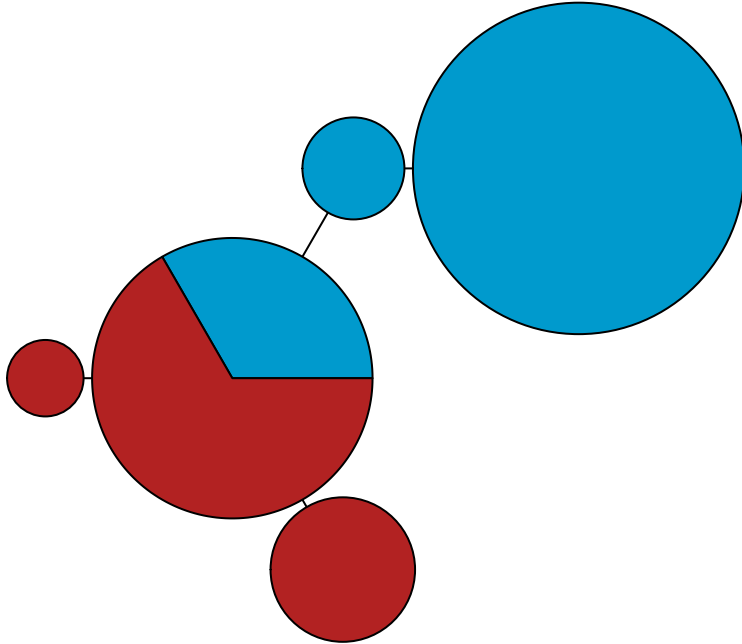

Figure S4. MBPA\_000000143 Stramenopiles

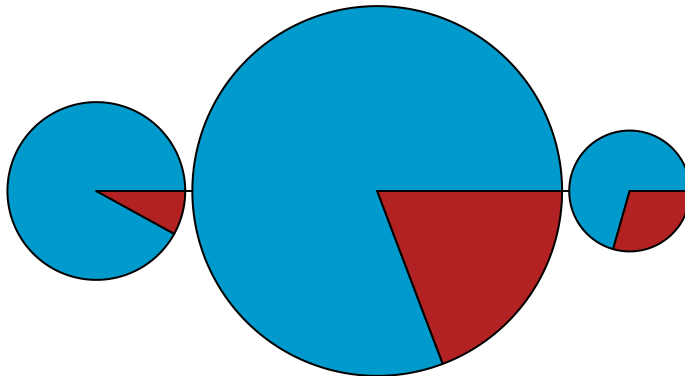

Figure S5. MBPA\_000000159 Rhodophyta

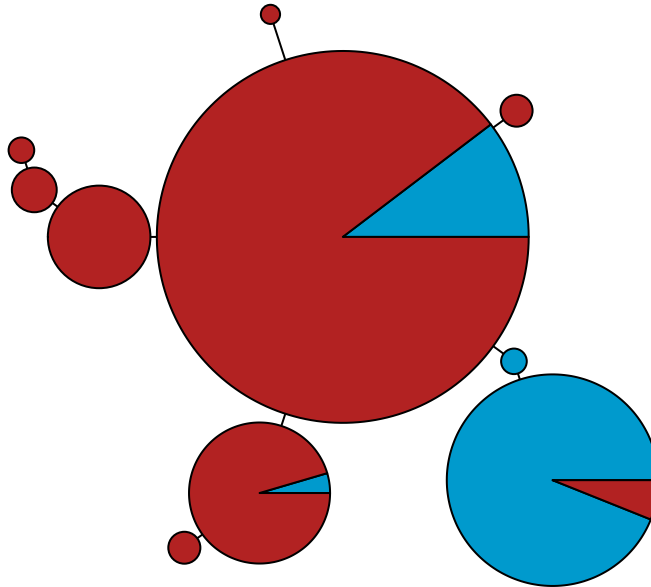

Figure S6. MBPA\_000000178 Metazoa

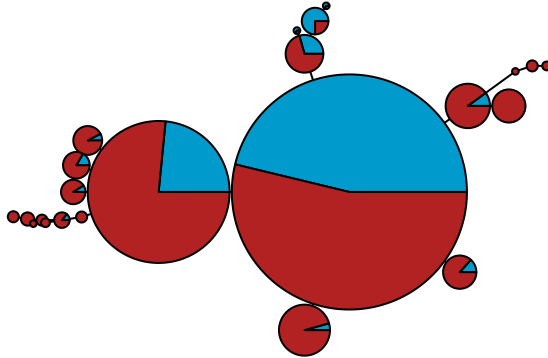

Figure S7. MBPA\_000000180 Metazoa

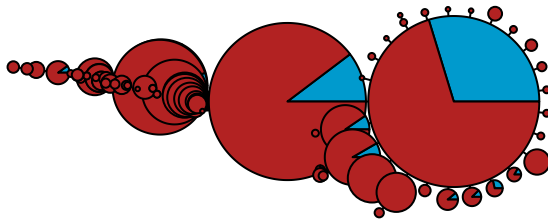



Figure S8. MBPA\_000000189 Rhodophyta

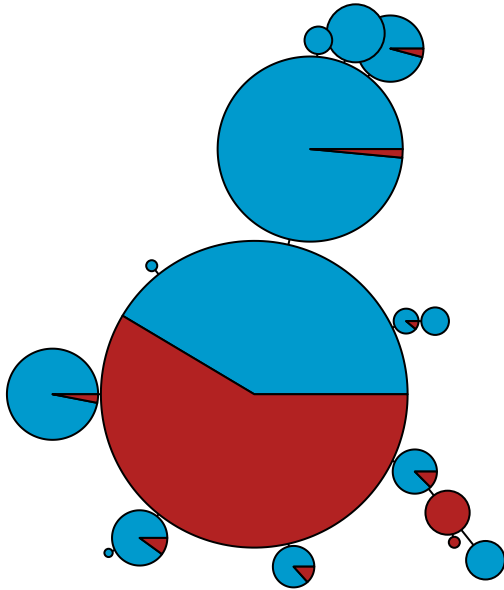

Figure S9. MBPA\_000000191 Stramenopiles

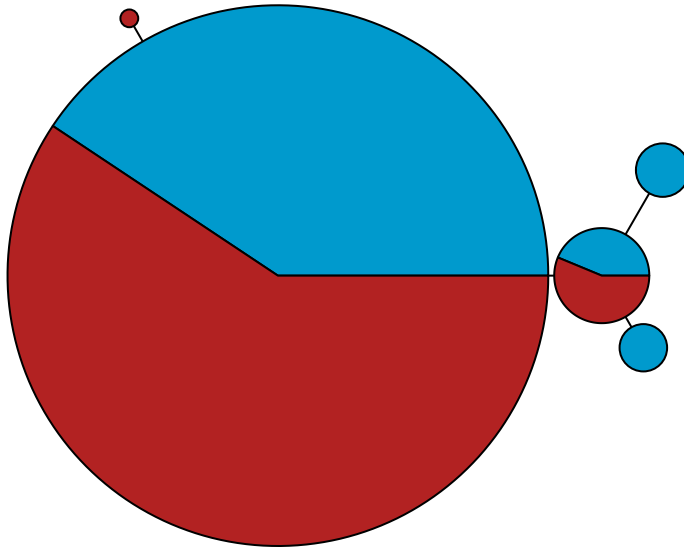

Figure S10. MBPA\_000000206 Rhodophyta

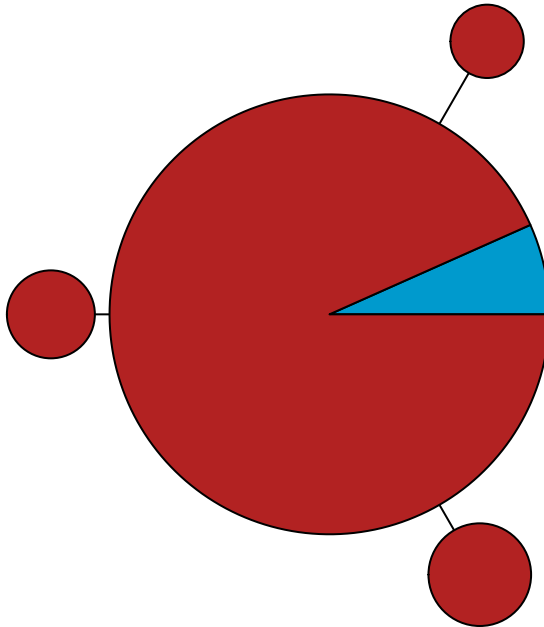

Figure S11. MBPA\_000000229 Metazoa

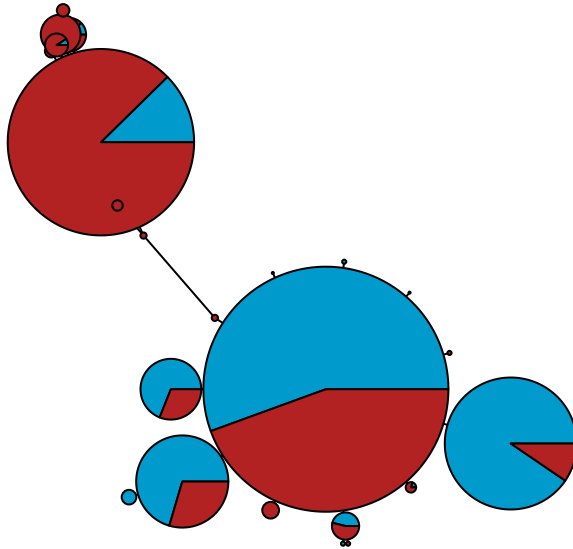

Figure S12. MBPA\_000000240 Metazoa

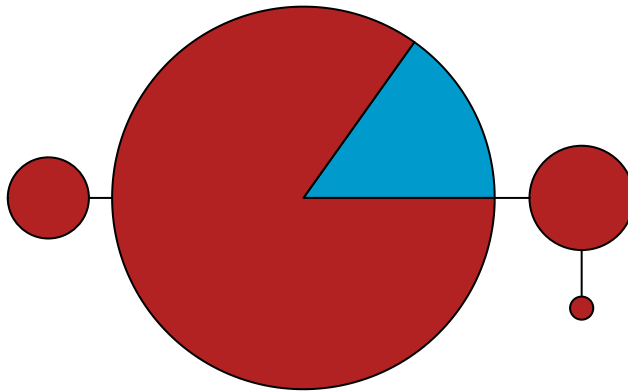

Figure S13. MBPA\_000000245 Rhodophyta

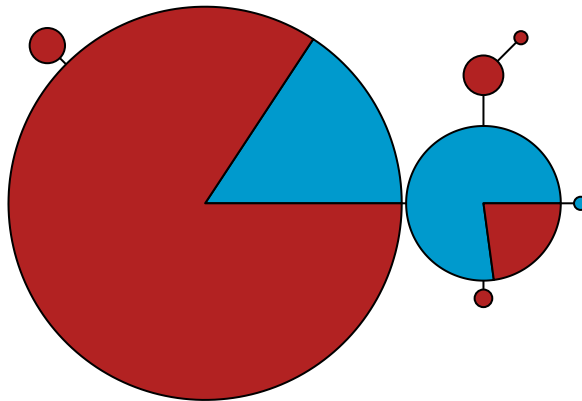

Figure S14. MBPA\_000000247 Rhodophyta

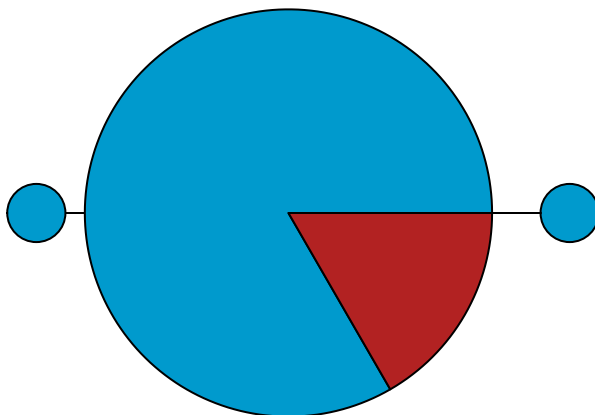

Figure S15. MBPA\_000000254 Rhodophyta

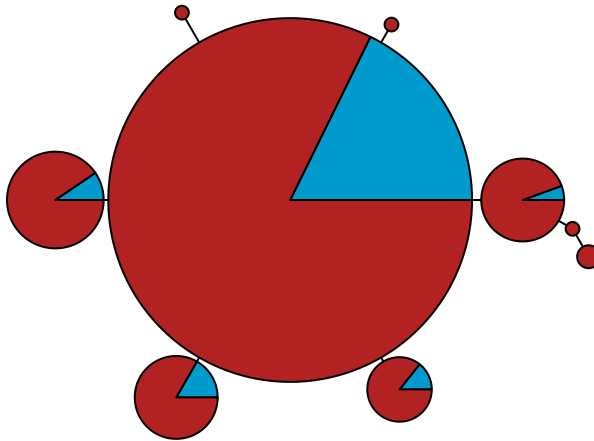



Figure S16. MBPA\_000000269 Rhodophyta

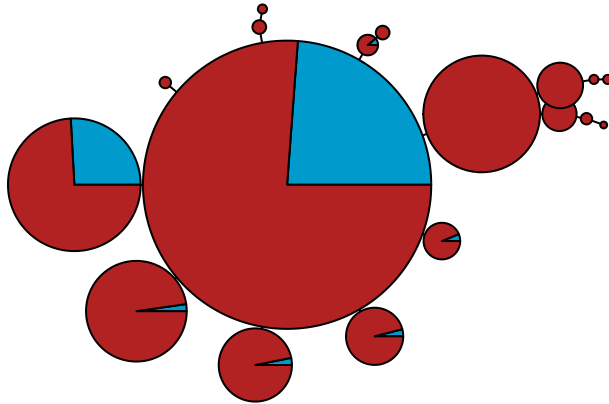

Figure S17. MBPA\_000000279 Metazoa

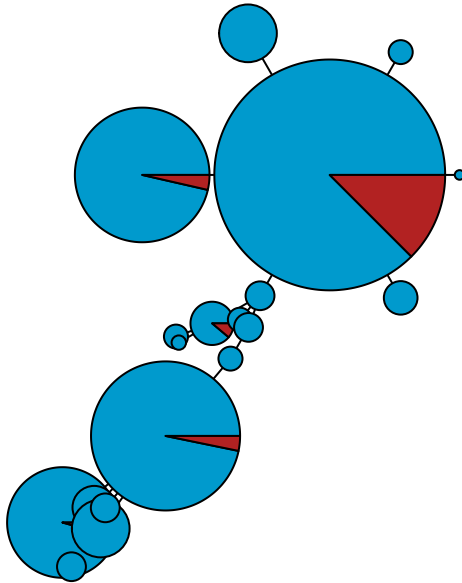



Figure S19. MBPA\_000000300 Metazoa

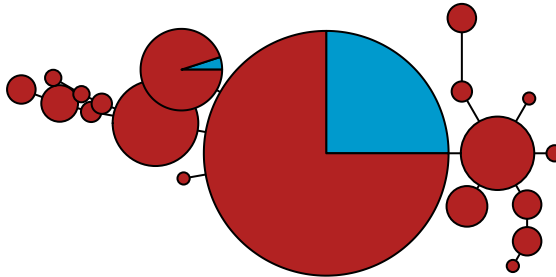

Figure S20. MBPA\_000000301 Metazoa

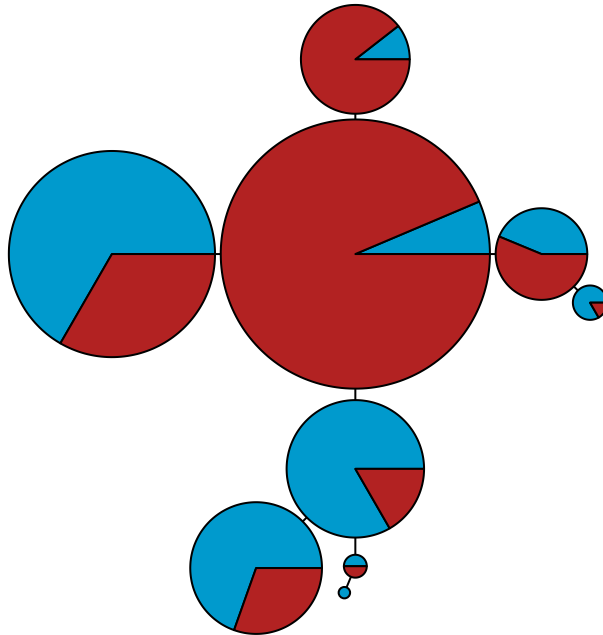

Figure S21. MBPA\_000000310 Rhodophyta

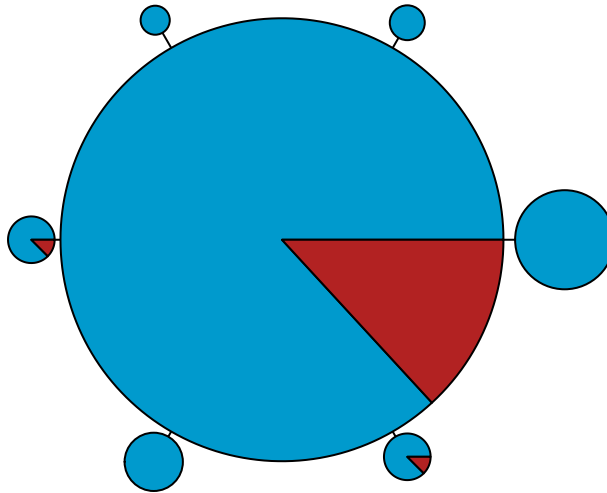

Figure S22. MBPA\_000000314 Metazoa

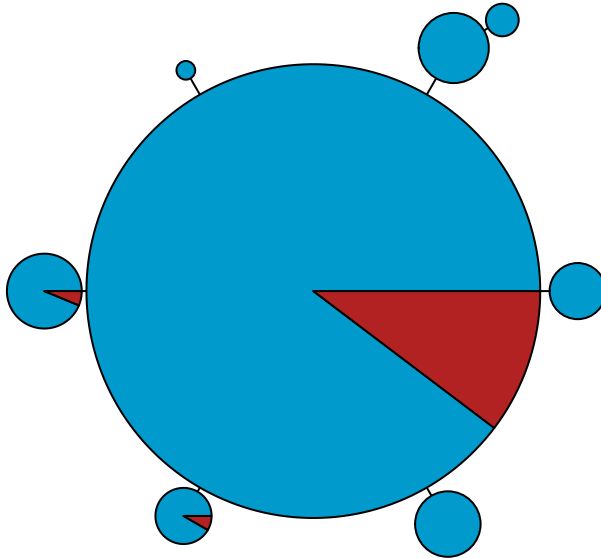

Figure S23. MBPA\_000000350 Metazoa

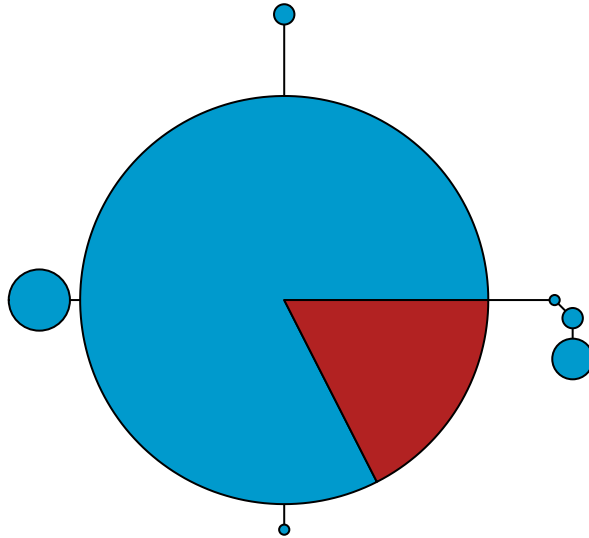



Figure S24. MBPA\_000000355 Metazoa

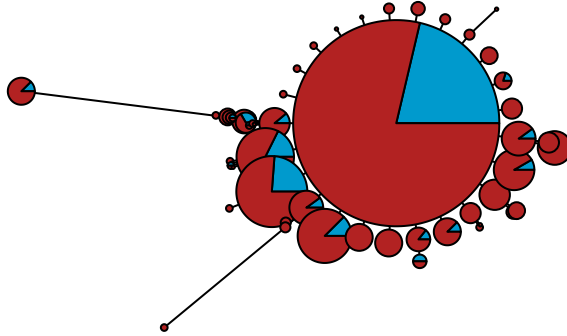

Figure S25. MBPA\_000000362 Stramenopiles

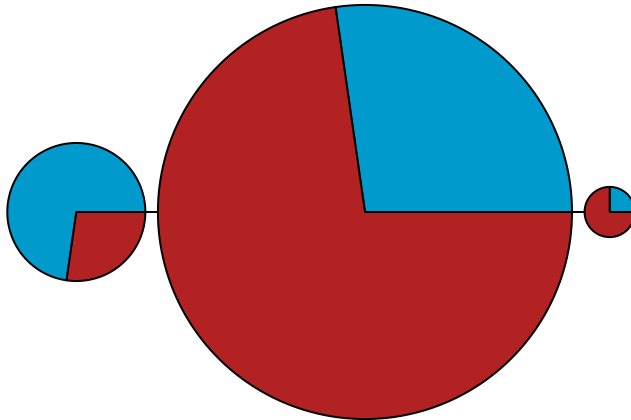

Figure S26. MBPA\_000000364 Metazoa

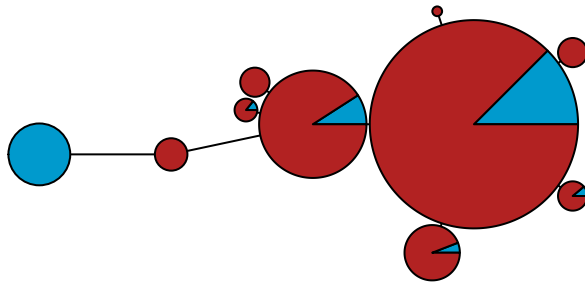

Figure S27. MBPA\_000000386 Metazoa

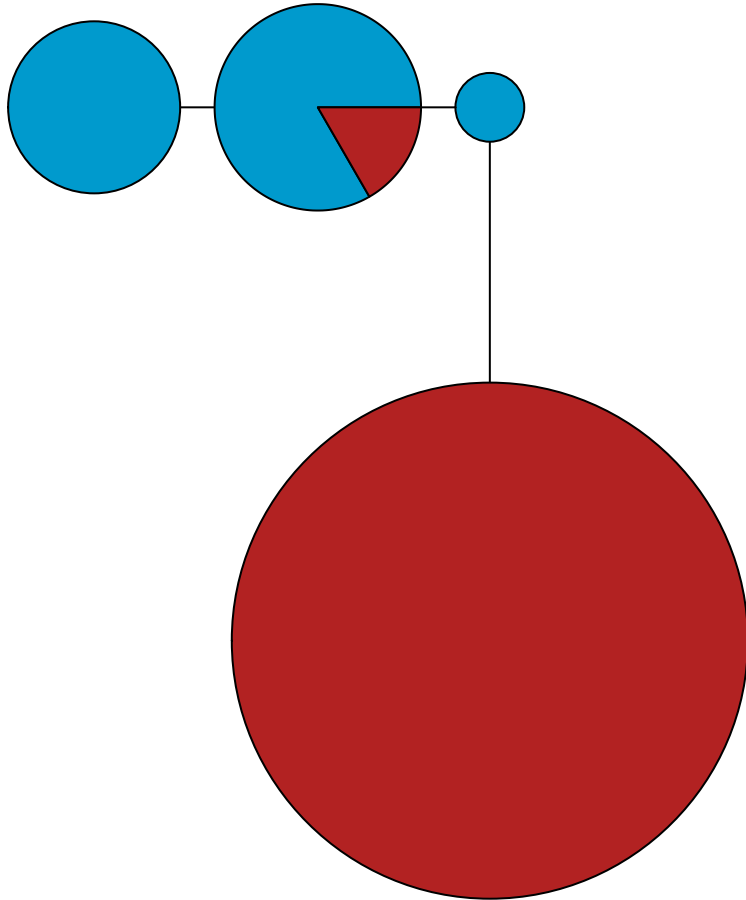

Figure S28. MBPA\_000000398

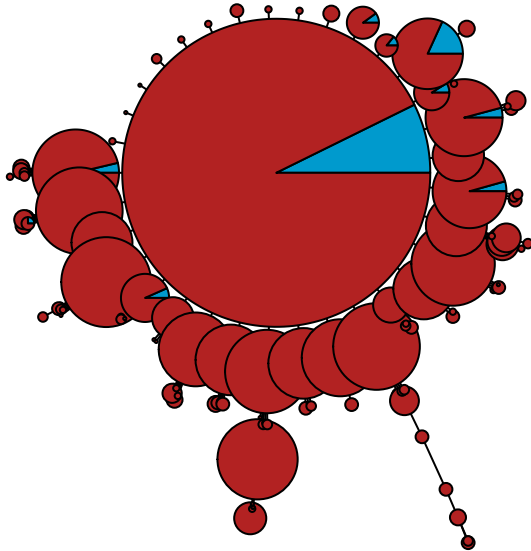

Figure S29. MBPA\_000000400 Rhodophyta

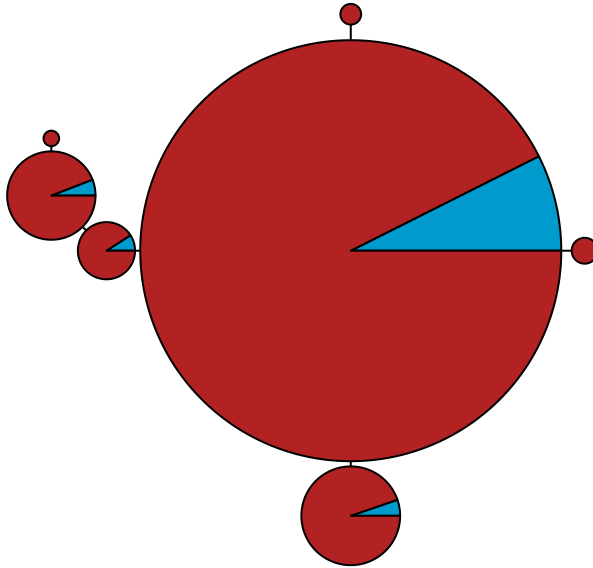

Figure S30. MBPA\_000000450 Metazoa

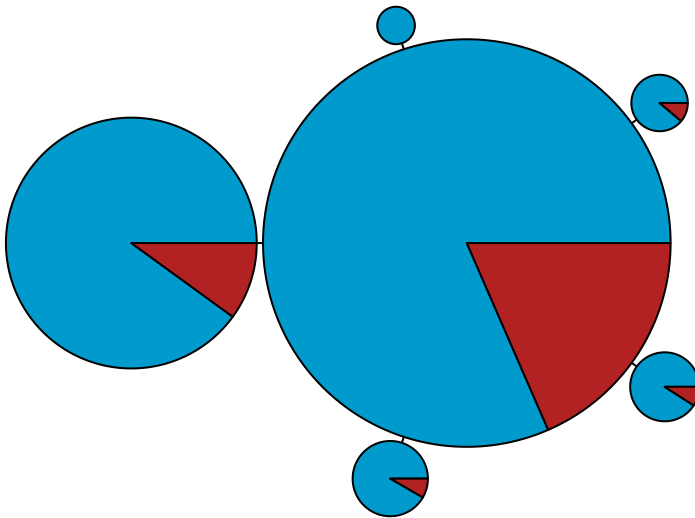

Figure S31. MBPA\_000000479 Metazoa

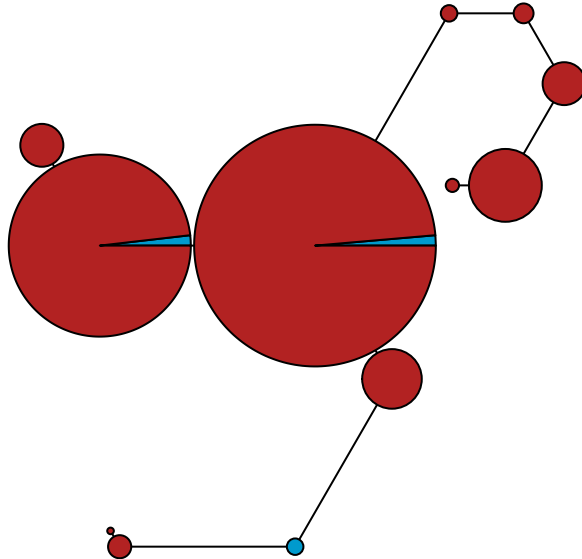



Figure S32. MBPA\_000000507 Metazoa

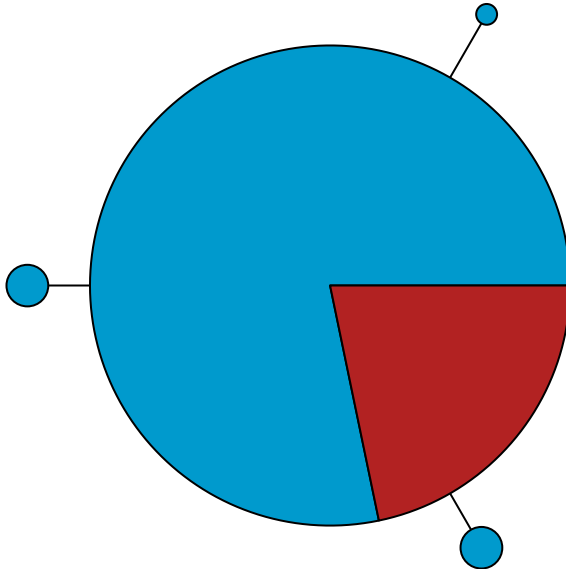

Figure S33. MBPA\_000000542 Rhodophyta

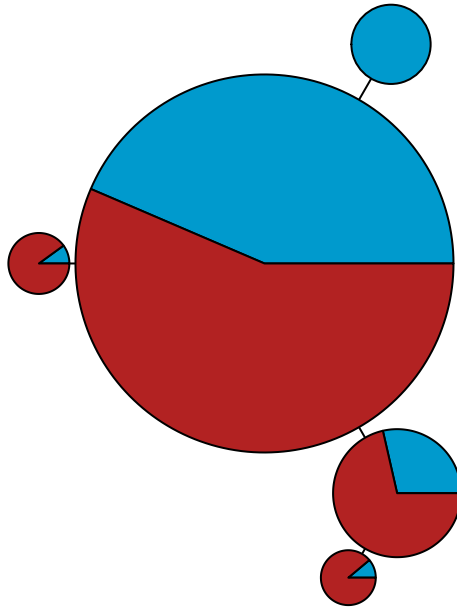

Figure S34. MBPA\_000000550

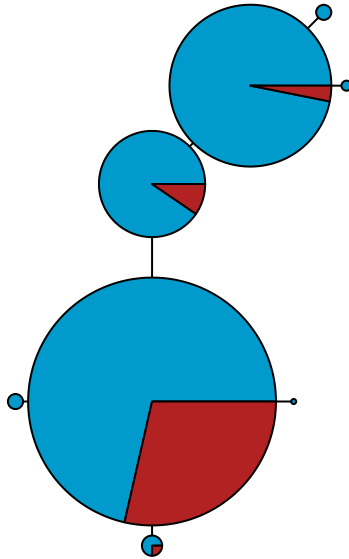

Figure S35. MBPA\_000000581 Stramenopiles

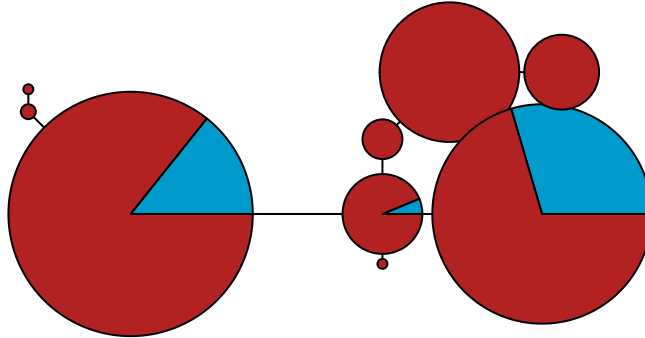

Figure S36. MBPA\_000000587 Metazoa

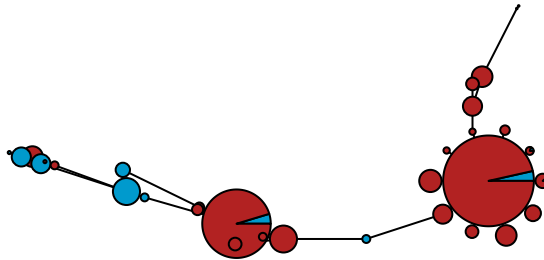

Figure S37. MBPA\_000000595 Metazoa

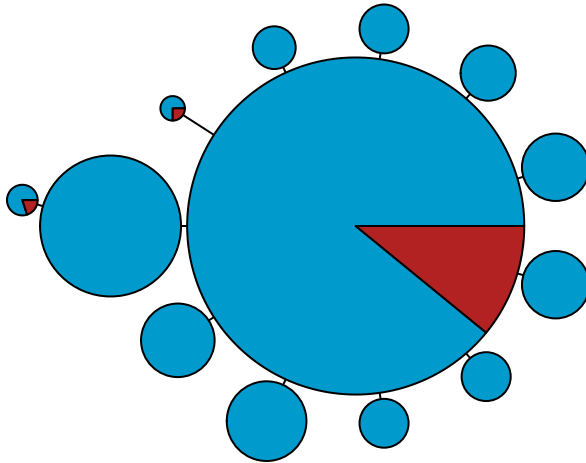

Figure S38. MBPA\_000000636 Rhodophyta

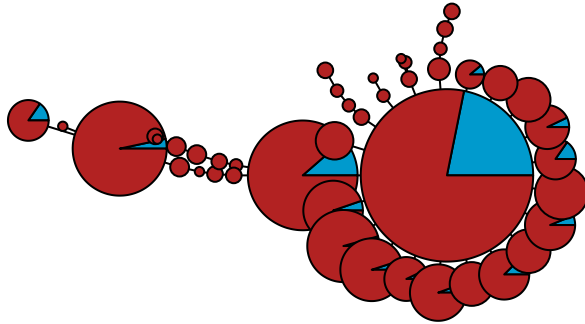

Figure S39. MBPA\_000000697 Metazoa

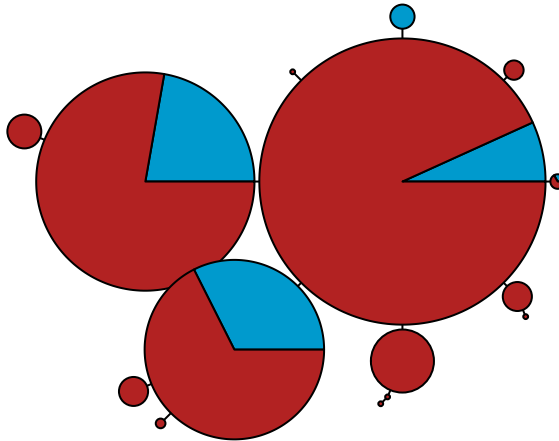



Figure S40. MBPA\_000000715 Metazoa

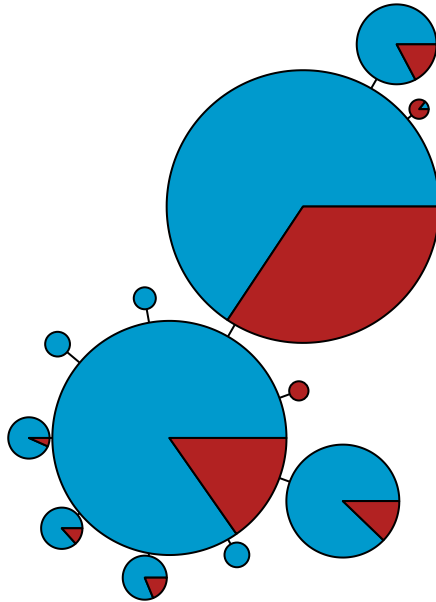

Figure S41. MBPA\_000000729 Metazoa

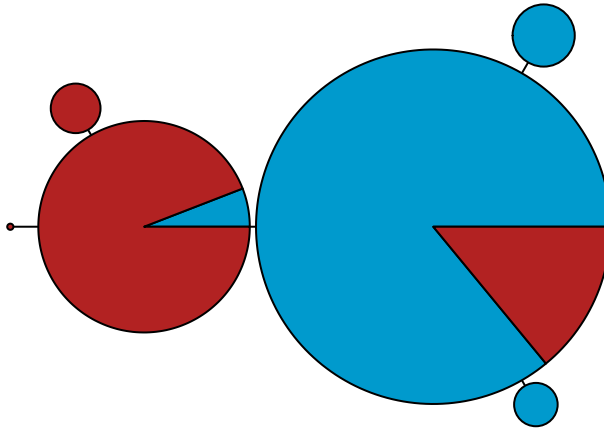

Figure S42. MBPA\_000000740 Rhodophyta

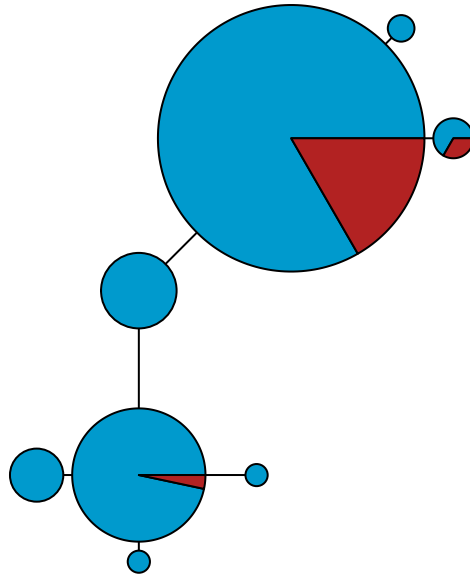

Figure S43. MBPA\_000000750 Metazoa

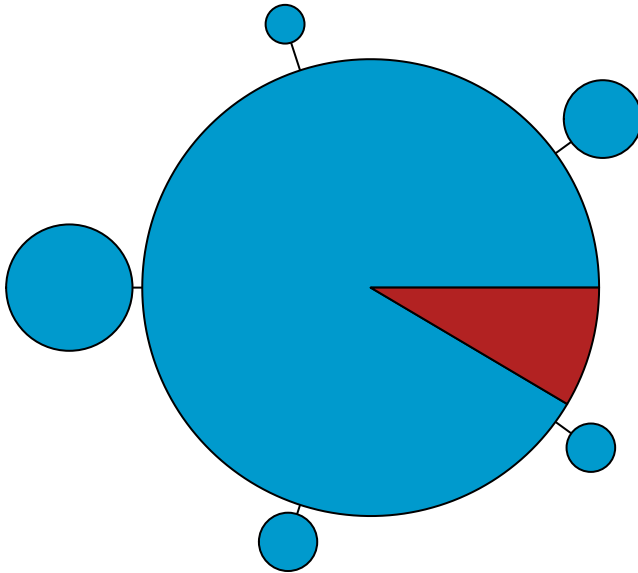

Figure S44. MBPA\_000000752 Metazoa

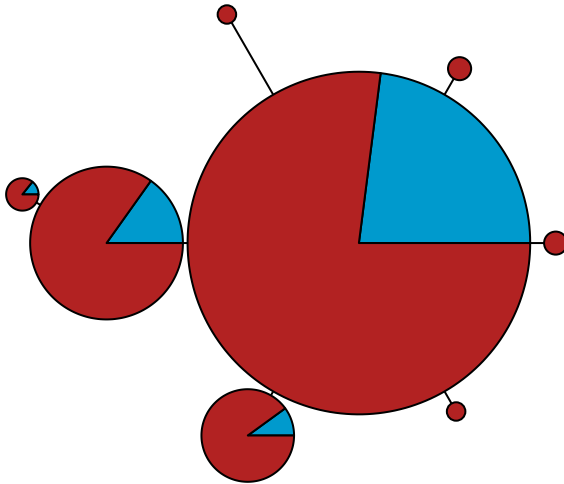

Figure S45. MBPA\_000000754 Rhodophyta

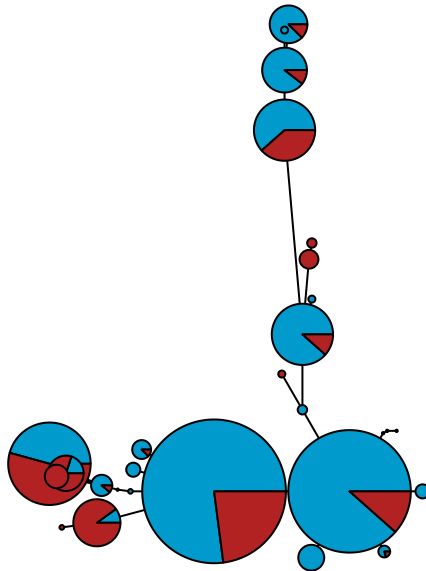

Figure S46. MBPA\_00000758 Metazoa

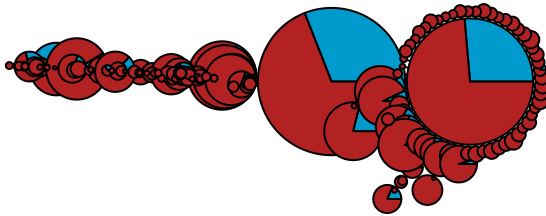

Figure S47. MBPA\_000000762 Metazoa

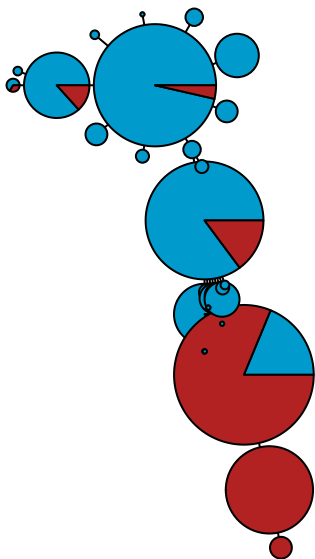



Figure S48. MBPA\_000000774 Metazoa

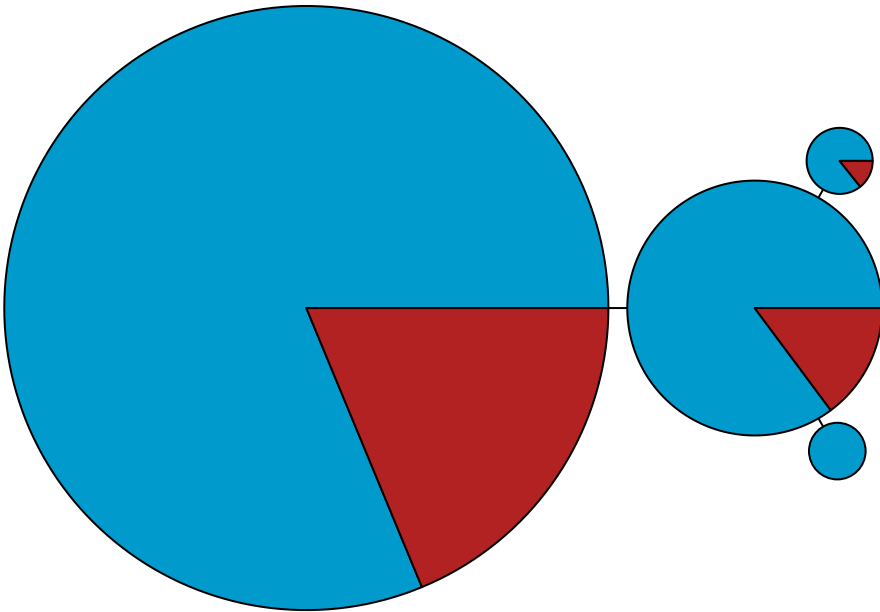

Figure S49. MBPA\_000000790 Metazoa

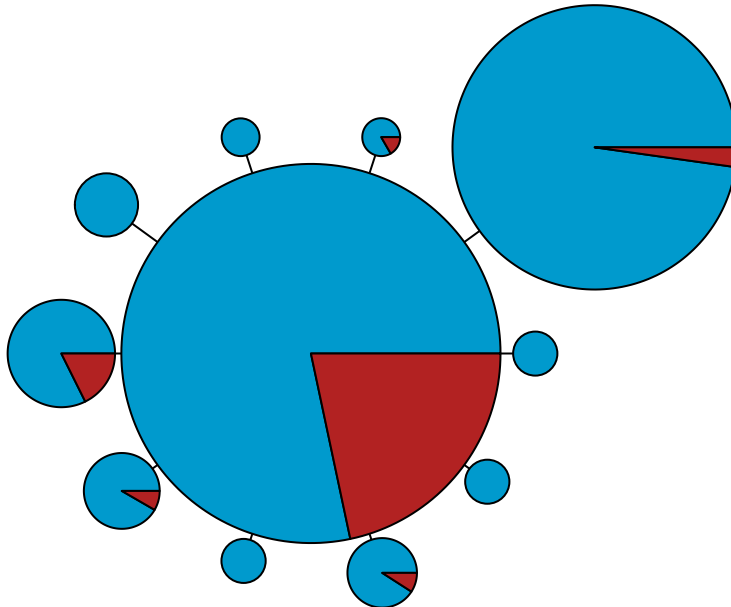

Figure S50. MBPA\_000000816 Metazoa

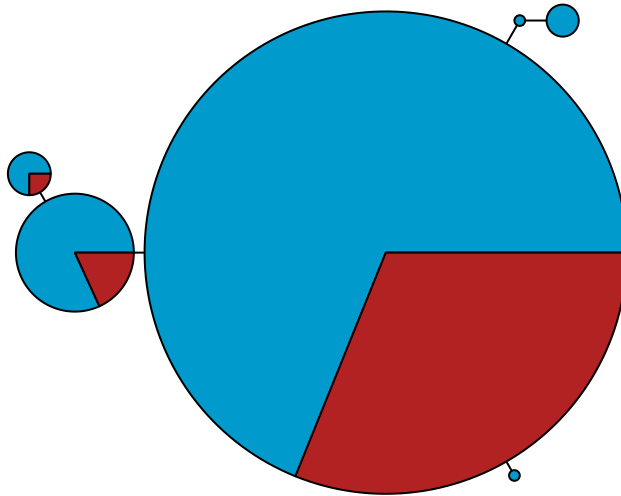

Figure S51. MBPA\_000000846 Metazoa

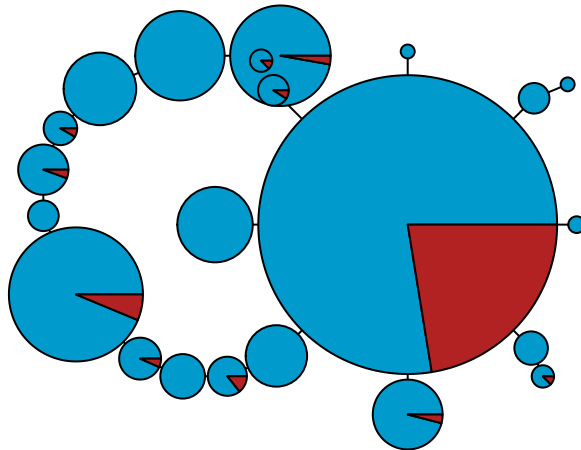

Figure S52. MBPA\_000000863 Metazoa

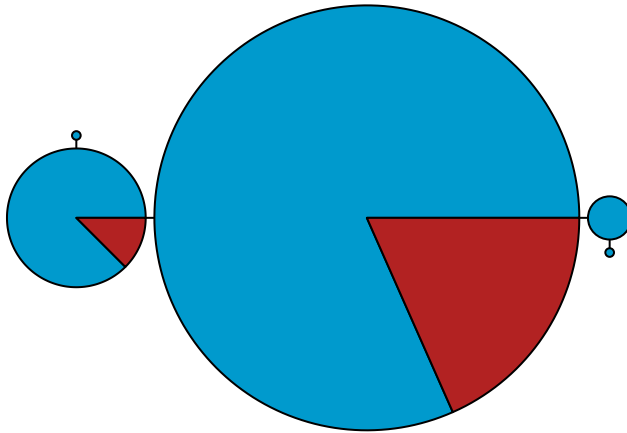

Figure S53. MBPA\_000000887 Metazoa

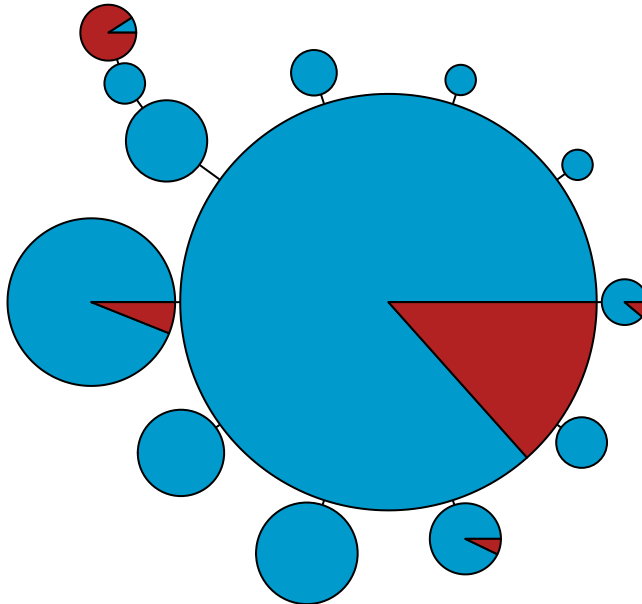

Figure S54. MBPA\_000000935 Metazoa

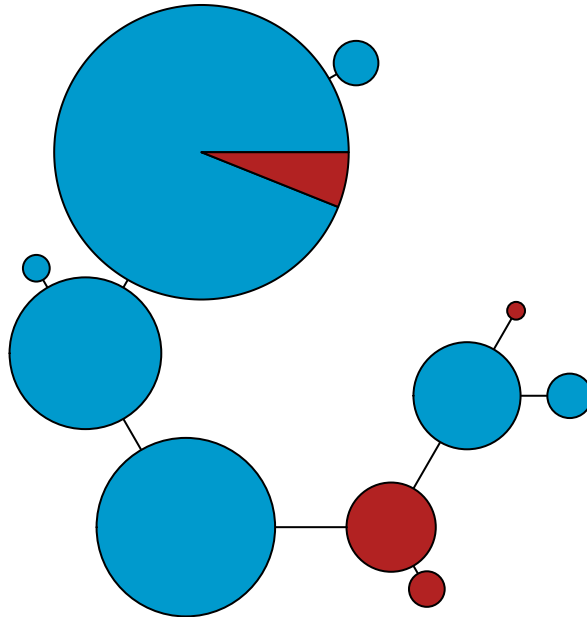

Figure S55. MBPA\_000000965 Metazoa

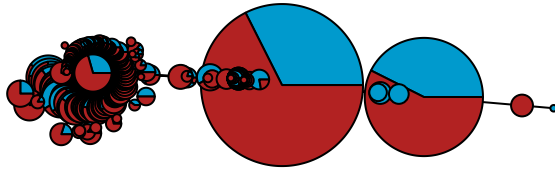



Figure S56. MBPA\_000000975 Metazoa

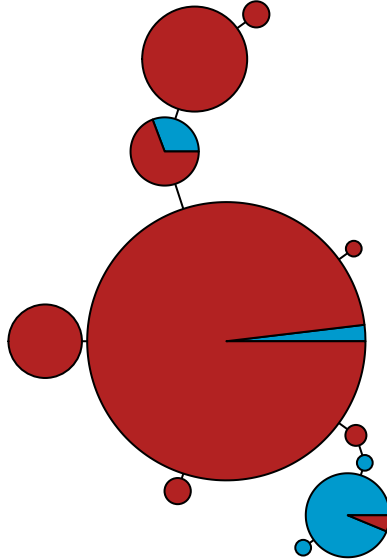

Figure S57. MBPA\_000000976 Metazoa

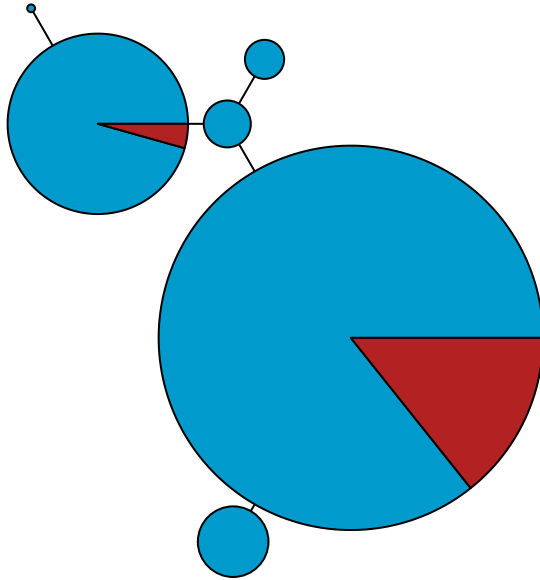

Figure S58. MBPA\_000000995 Metazoa

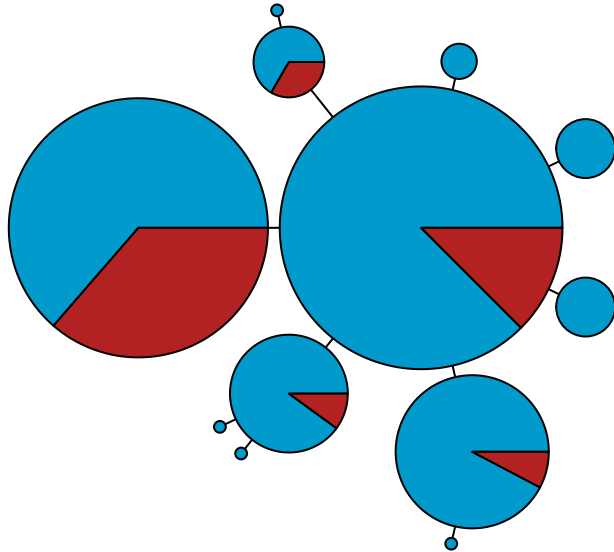

Figure S59. MBPA\_000001009 Metazoa

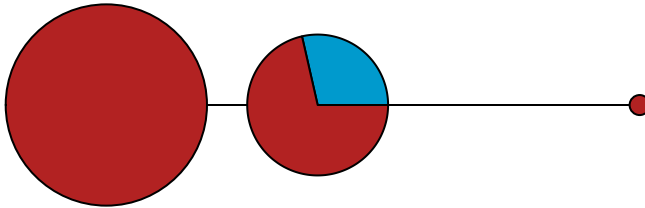

Figure S60. MBPA\_000001011 Metazoa

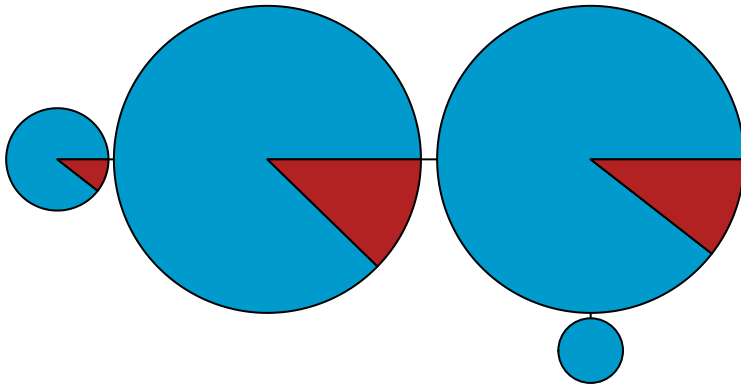

Figure S61. MBPA\_000001014 Metazoa

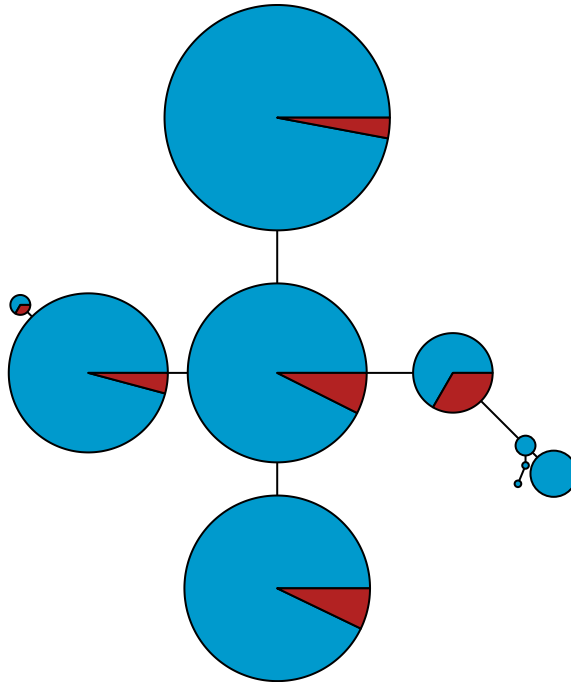

Figure S62. MBPA\_000001015 Metazoa

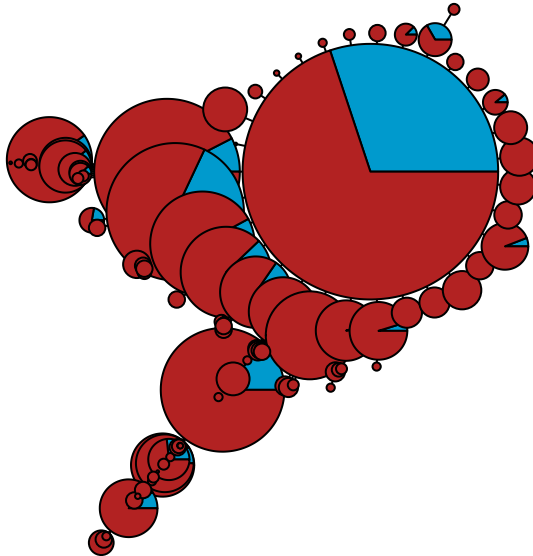

Figure S63. MBPA\_000001019 Metazoa

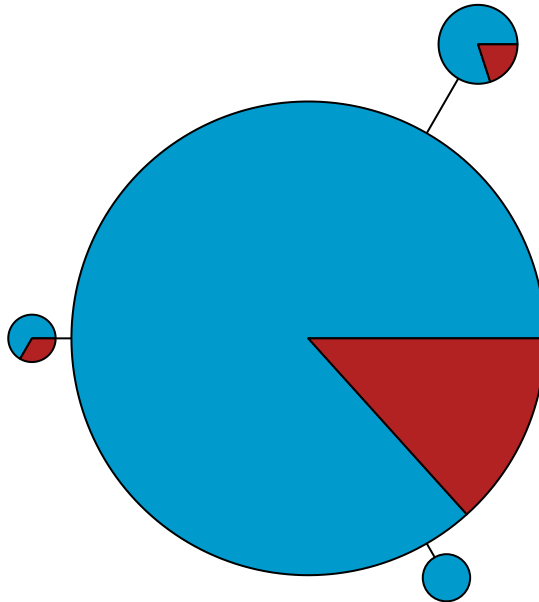



Figure S64. MBPA\_000001038 Rhodophyta

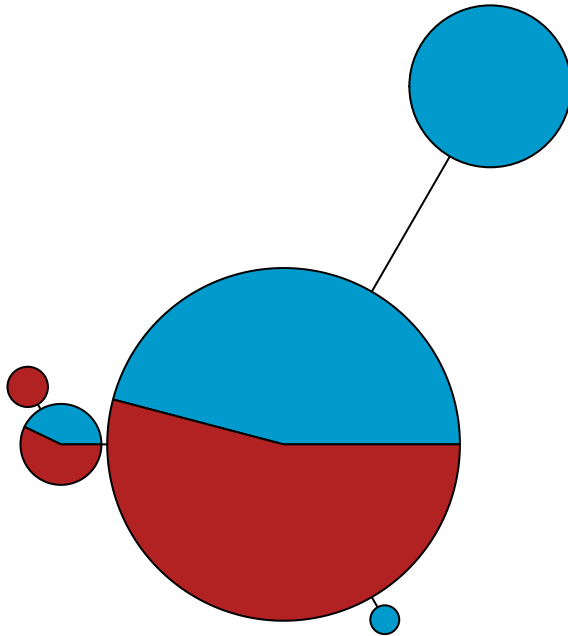

Figure S65. MBPA\_000001075 Metazoa

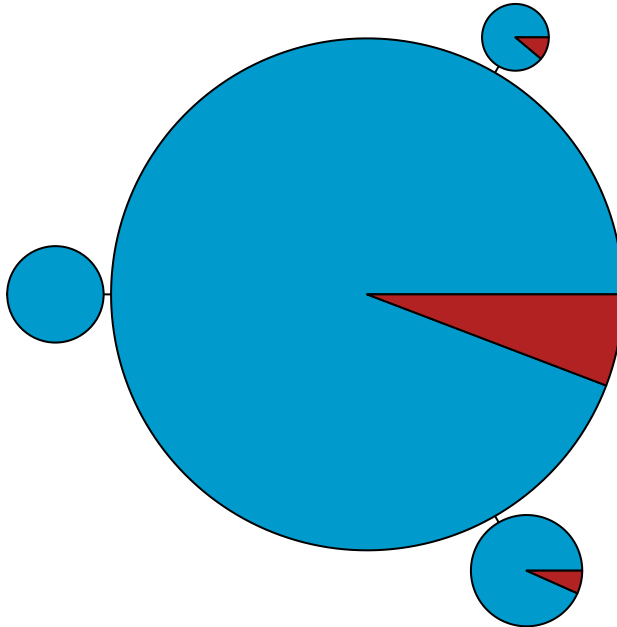

Figure S66. MBPA\_000001081 Metazoa

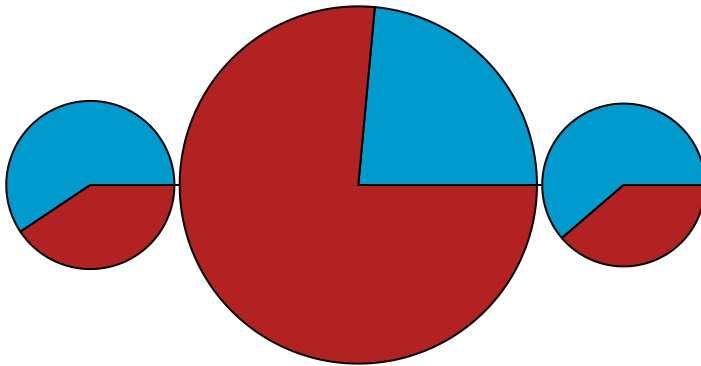

Figure S67. MBPA\_000001116 Metazoa

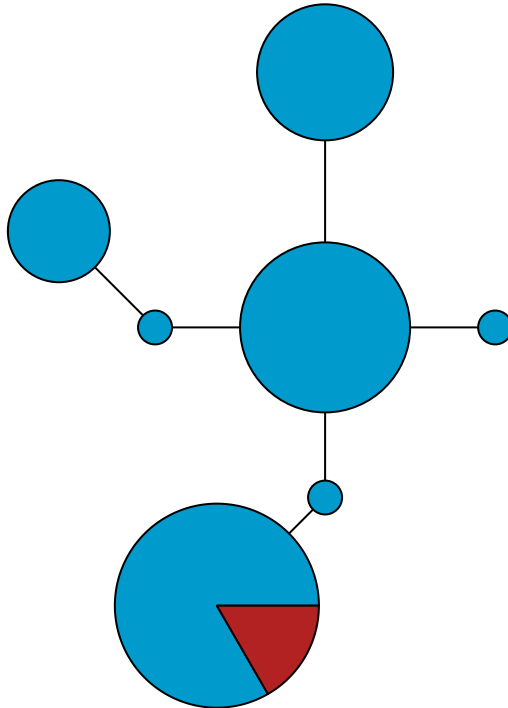

Figure S68. MBPA\_000001158 Metazoa

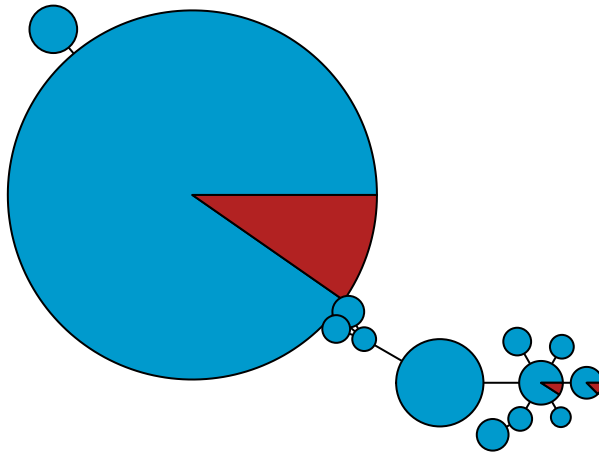

Figure S69. MBPA\_000001172 Metazoa

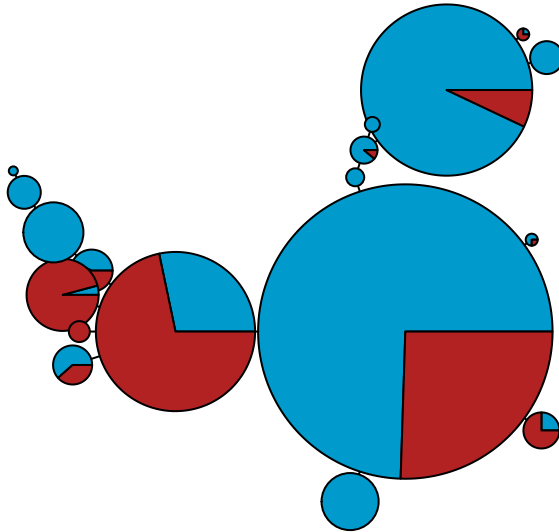

Figure S70. MBPA\_000001190 Rhodophyta

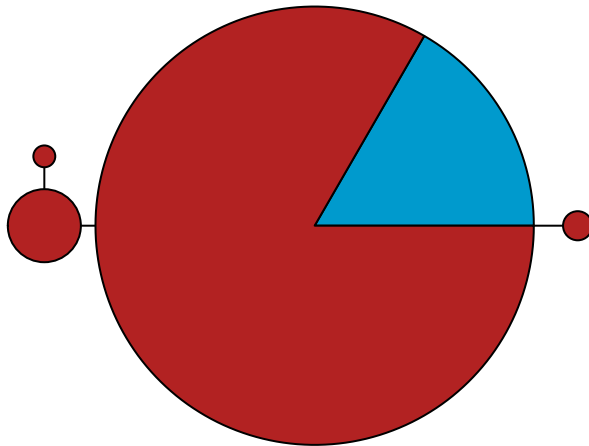

Figure S71. MBPA\_000001194 Stramenopiles

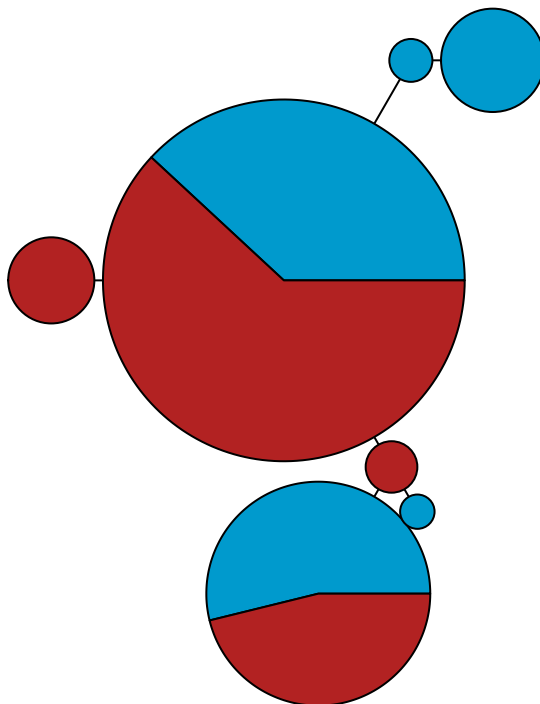





Figure S73. MBPA\_000001205 Stramenopiles

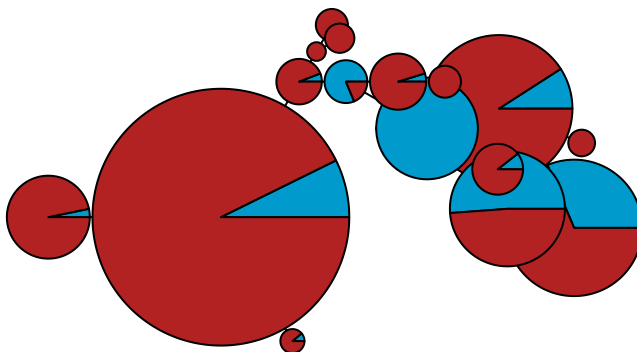

Figure S74. MBPA\_000001214 Metazoa

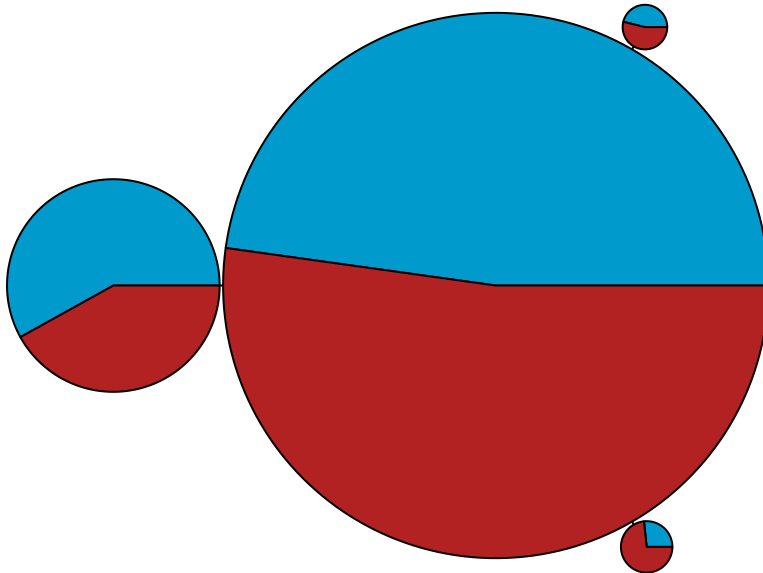

Figure S75. MBPA\_000001240 Metazoa

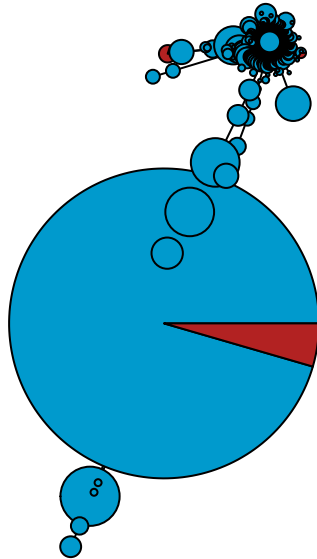

Figure S76. MBPA\_000001378 Metazoa

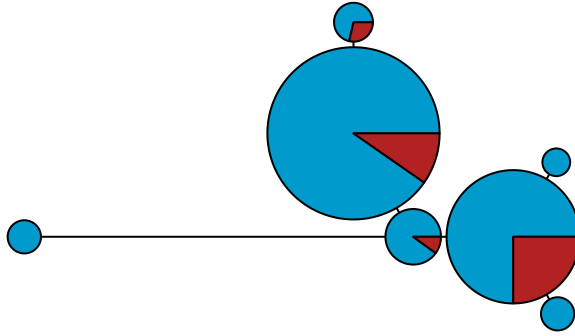

Figure S77. MBPA\_000001396 Rhodophyta

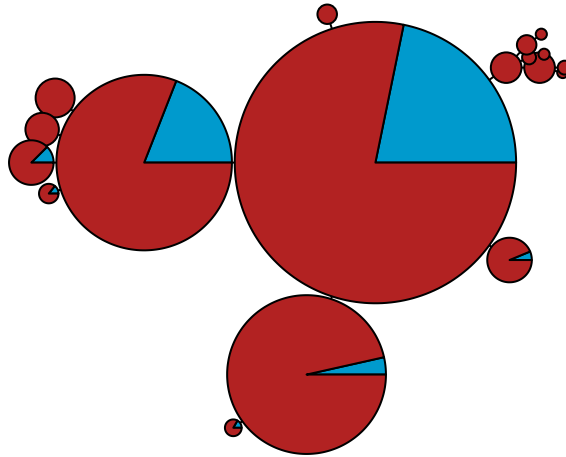

Figure S78. MBPA\_000001417 Metazoa

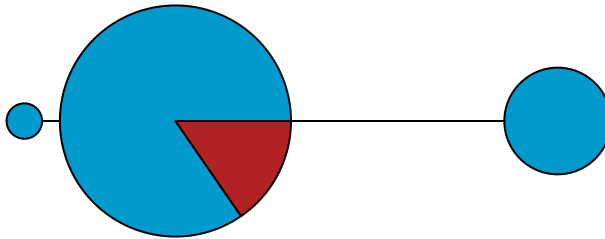

Figure S79. MBPA\_000001432 Metazoa

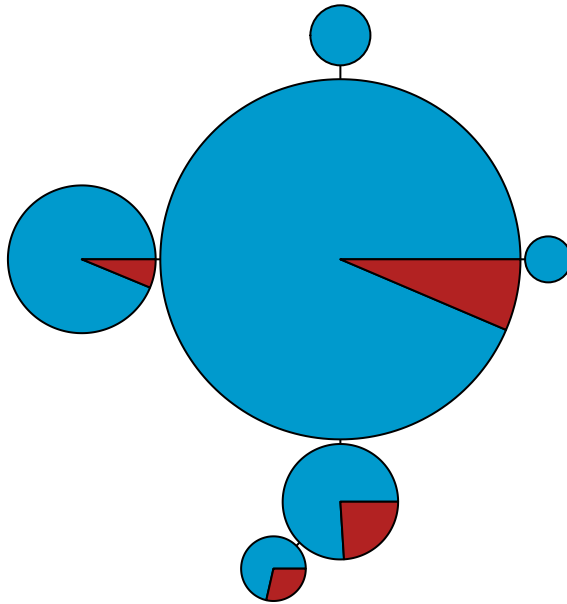



Figure S80. MBPA\_000001444 Metazoa

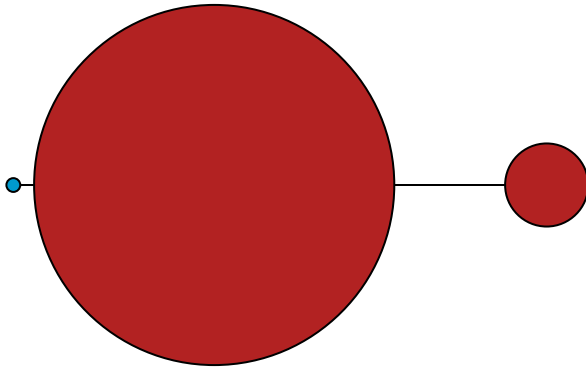

Figure S81. MBPA\_000001446 Metazoa

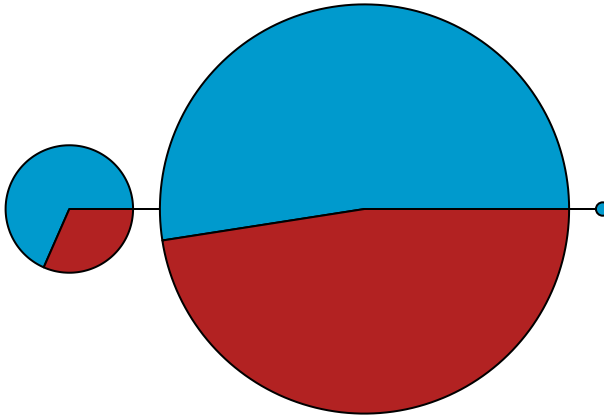

Figure S82. MBPA\_000001457 Metazoa

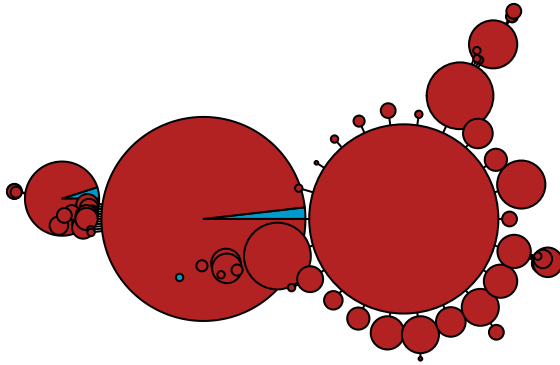

Figure S83. MBPA\_000001473 Metazoa

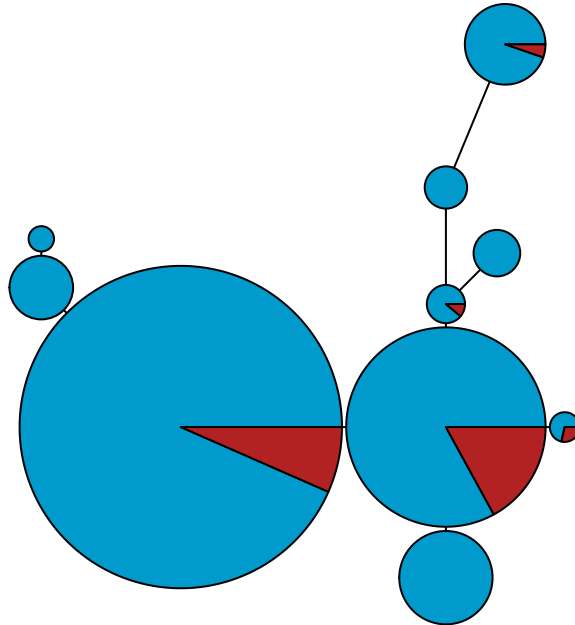



Figure S85. MBPA\_000001531 Metazoa

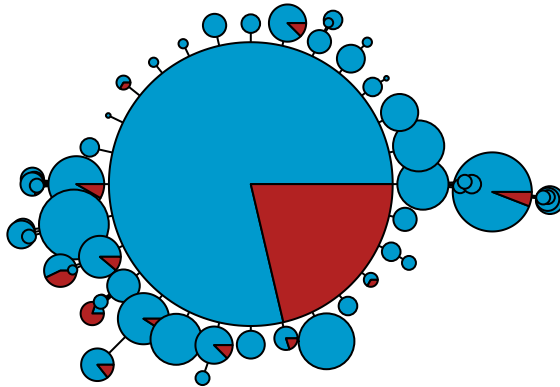

Figure S86. MBPA\_000001532 Metazoa

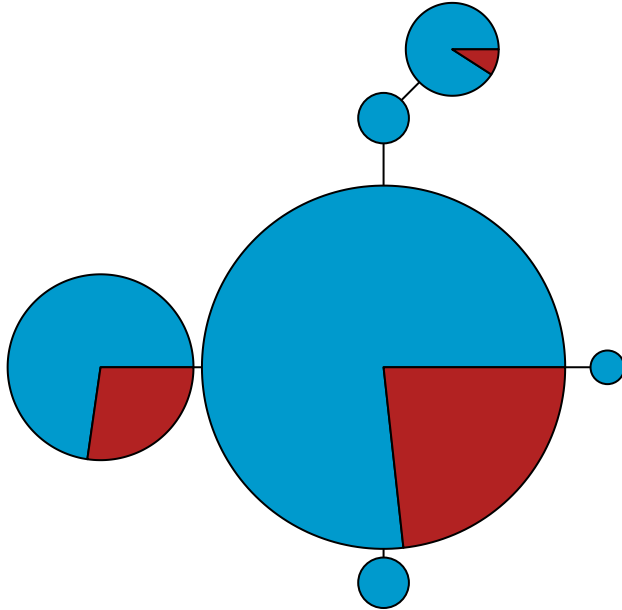

Figure S87. MBPA\_000001534 Metazoa

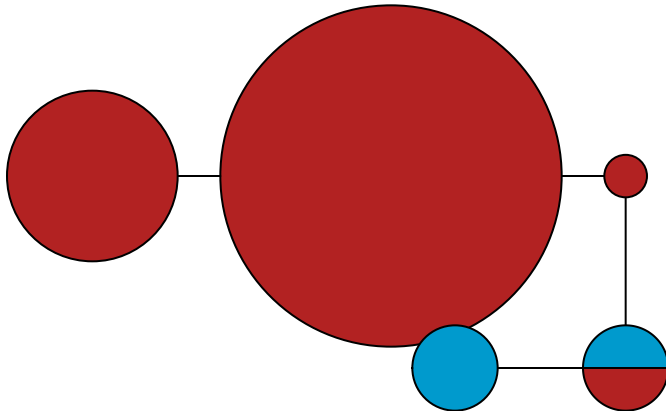



Figure S88. MBPA\_000001541 Stramenopiles

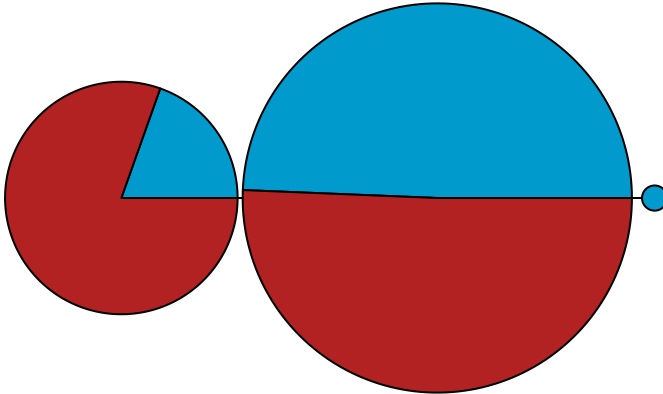

Figure S89. MBPA\_000001606 Metazoa

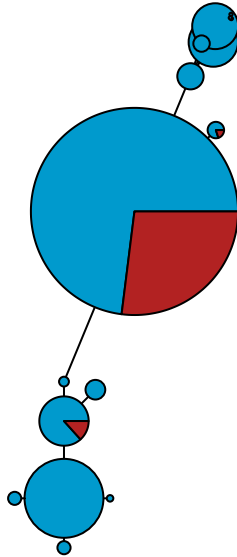

Figure S90. MBPA\_000001625

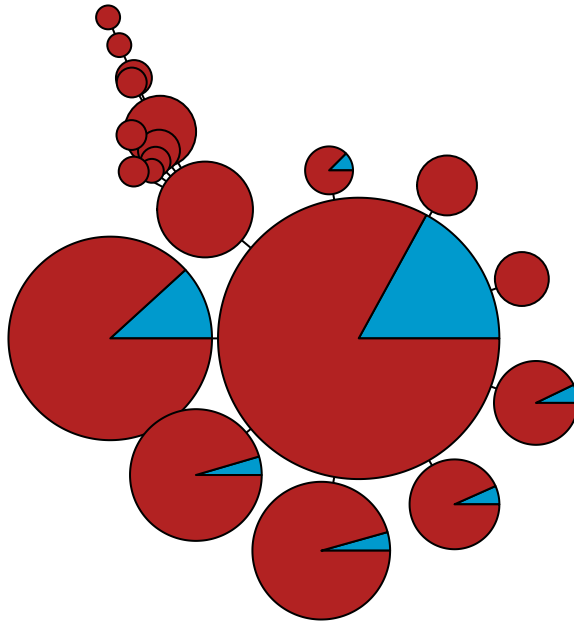

Figure S91. MBPA\_000001680 Rhodophyta

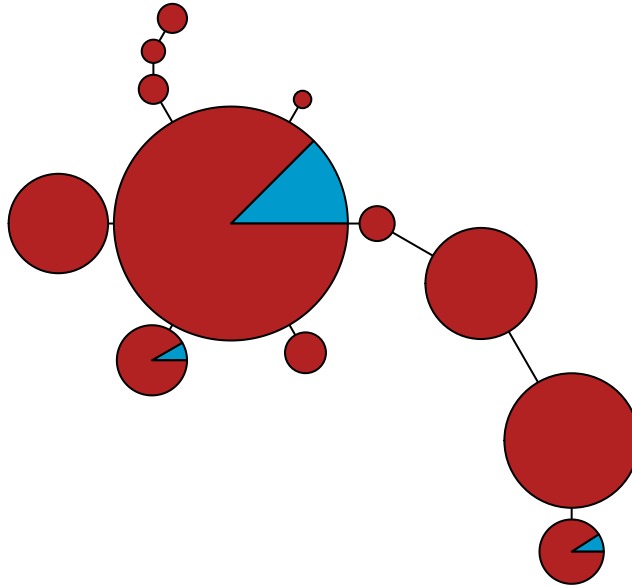

Figure S92. MBPA\_000001687 Metazoa

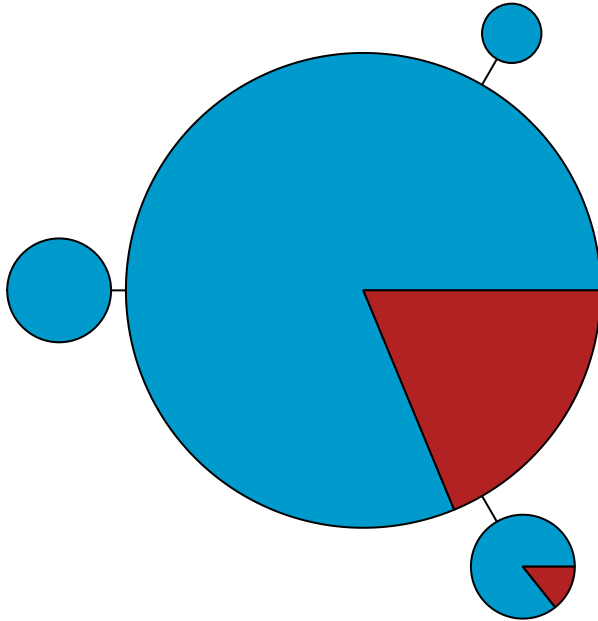

Figure S93. MBPA\_000001715 Rhodophyta

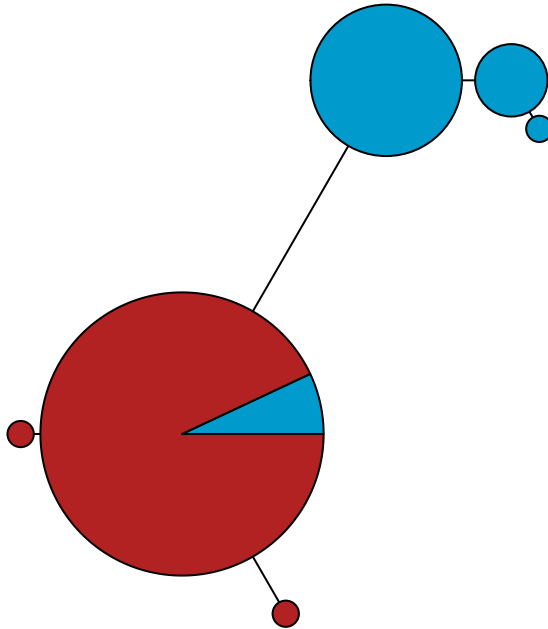

Figure S94. MBPA\_000001740 Metazoa

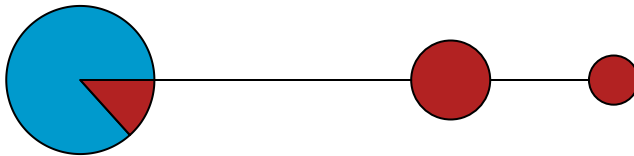

Figure S95. MBPA\_000001748 Metazoa

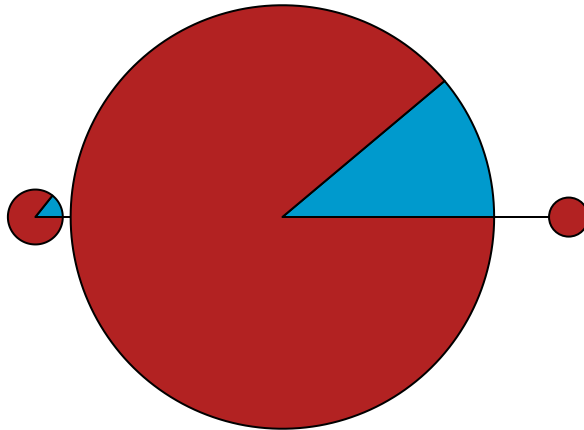



Figure S96. MBPA\_000001908 Metazoa

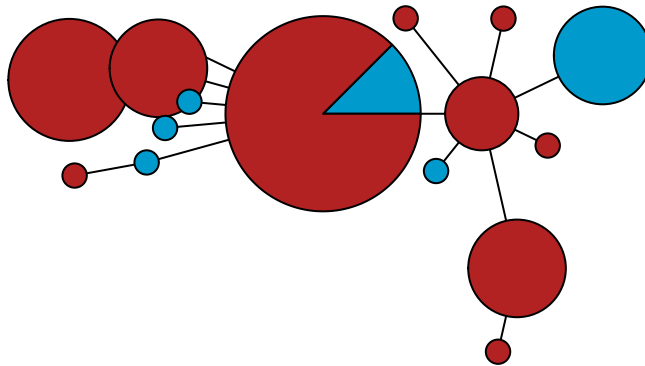

Figure S97. MBPA\_000001958 Stramenopiles

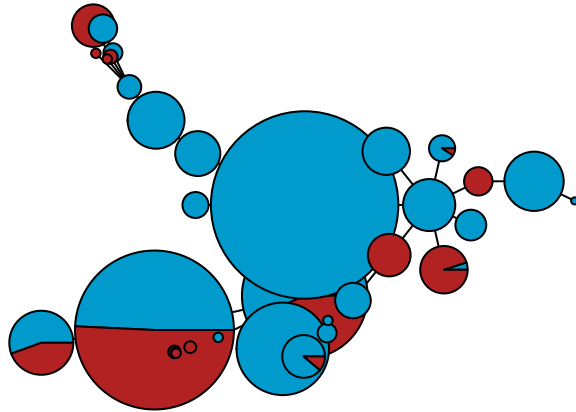

Figure S98. MBPA\_000002017 Rhodophyta

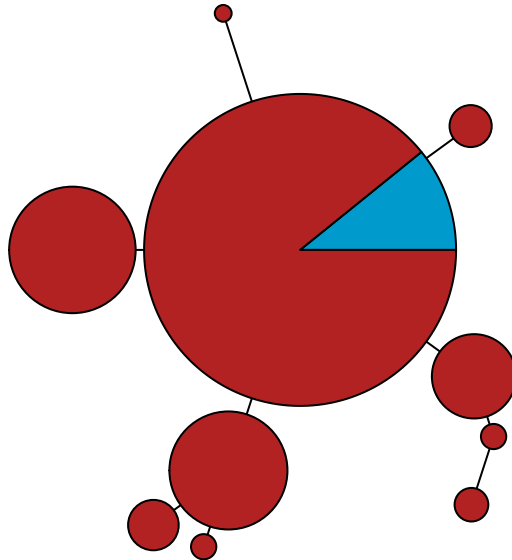

Figure S99. MBPA\_000002140 Rhodophyta

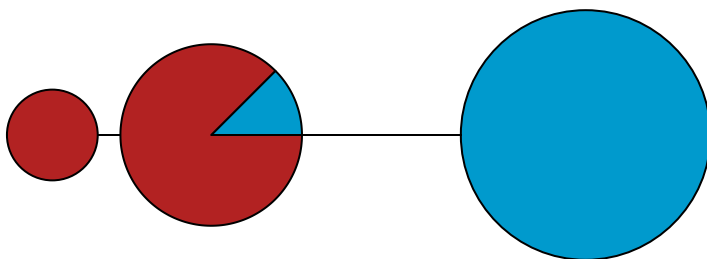

Figure S100. MBPA\_000002155 Metazoa

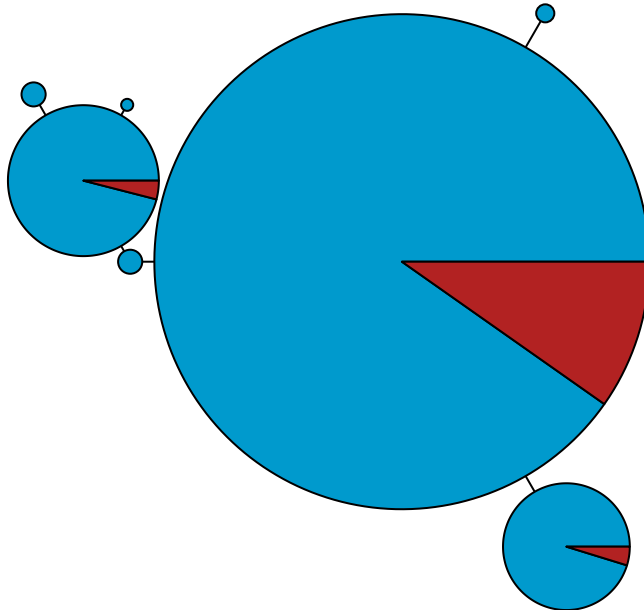

Figure S101. MBPA\_000002164 Metazoa

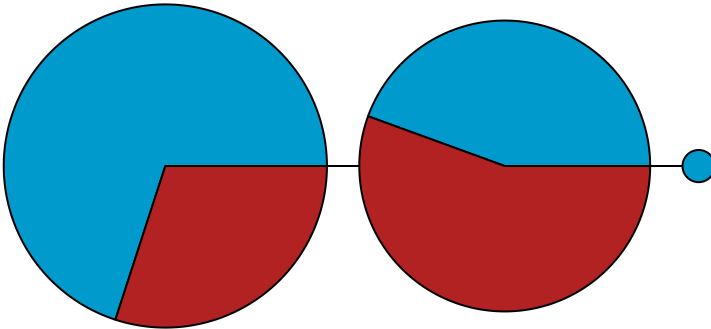

Figure S102. MBPA\_000002175 Metazoa

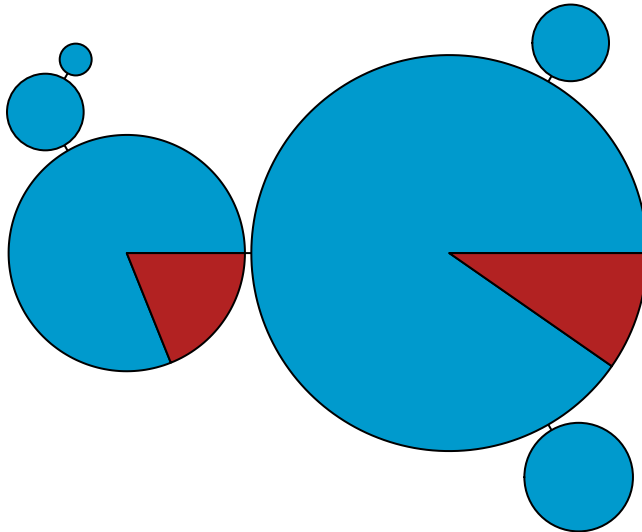

Figure S103. MBPA\_000002183 Stramenopiles

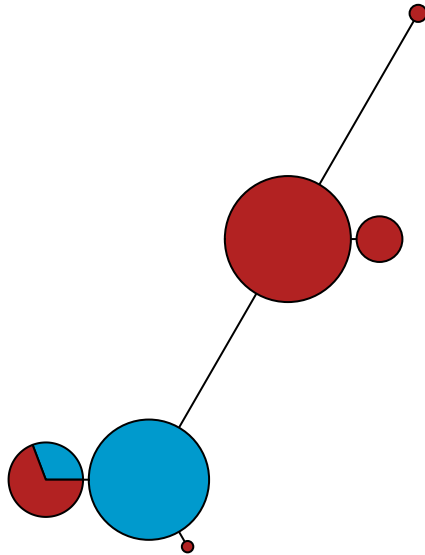



Figure S104. MBPA\_000002241 Rhodophyta

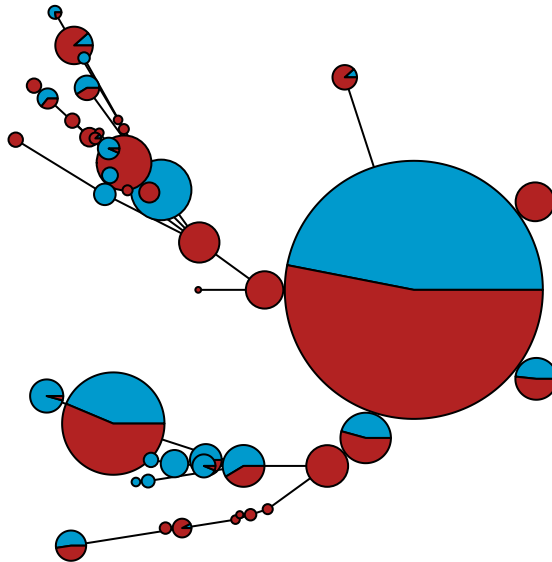

Figure S105. MBPA\_000002268 Metazoa

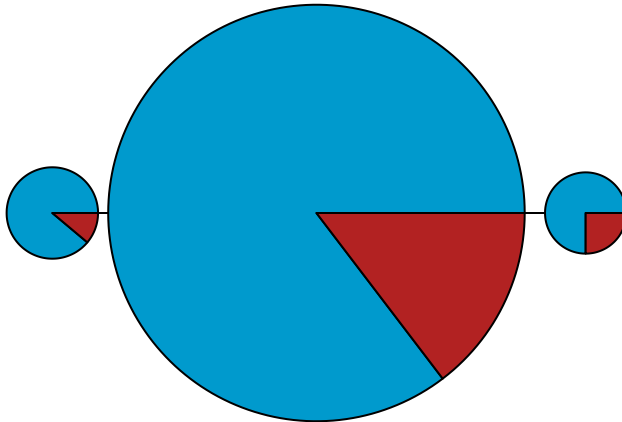

Figure S106. MBPA\_000002274 Metazoa

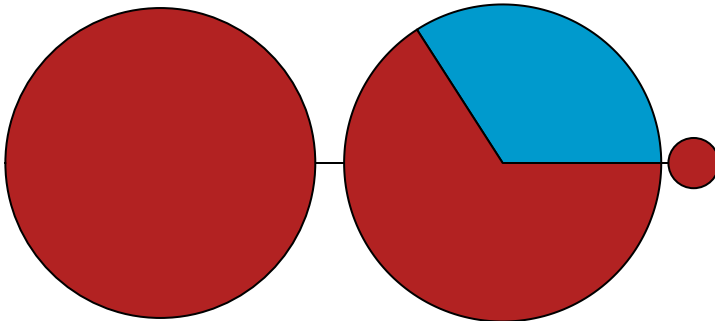

Figure S107. MBPA\_000002284 Stramenopiles

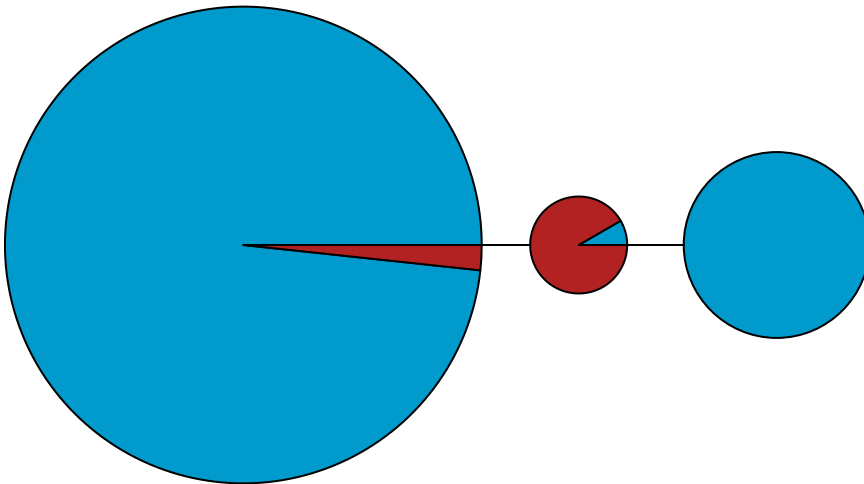

Figure S108. MBPA\_000002320 Rhodophyta

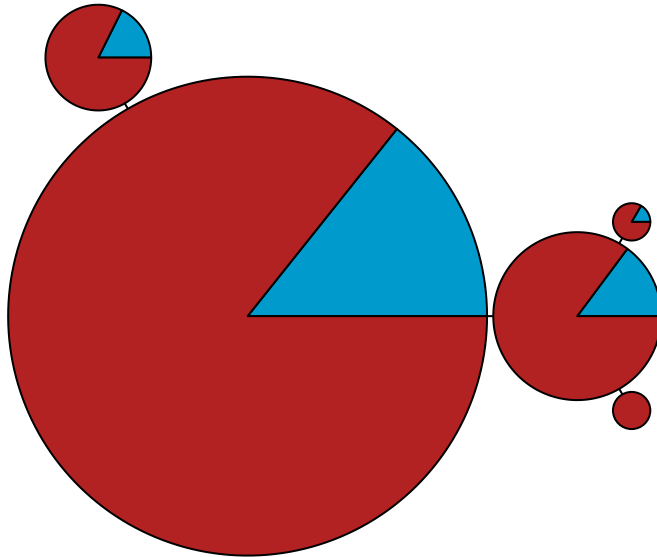

Figure S109. MBPA\_000002335 Metazoa

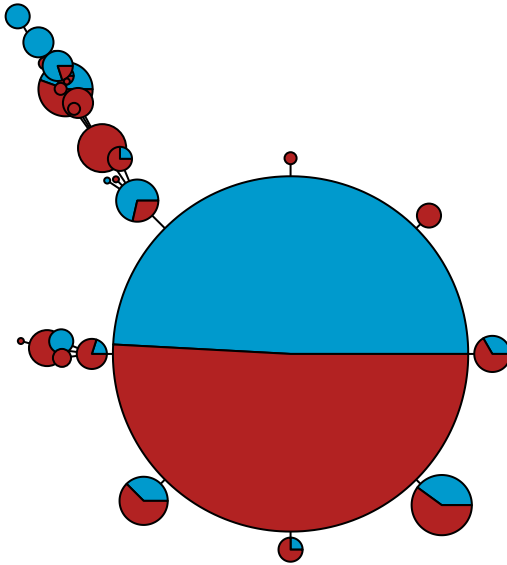

Figure S110. MBPA\_000002368 Metazoa

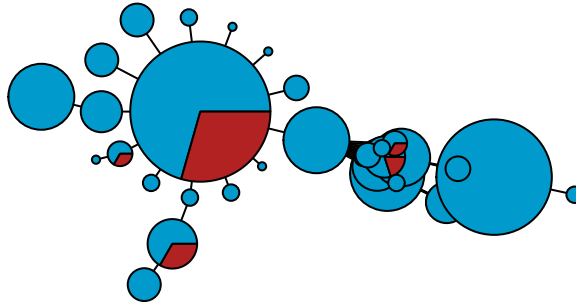

Figure S111. MBPA\_000002373 Rhodophyta

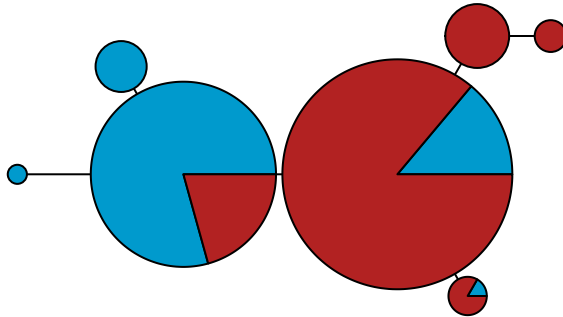



Figure S112. MBPA\_000002384 Metazoa

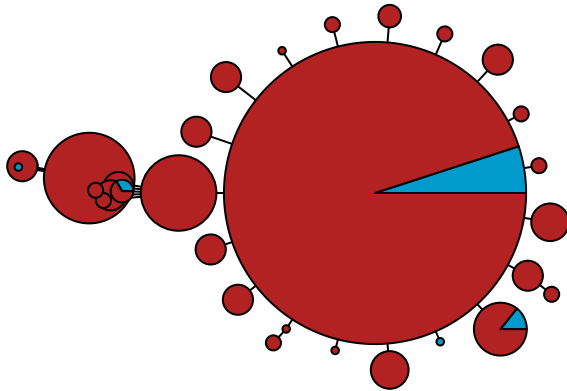

Figure S113. MBPA\_000002404 Rhodophyta

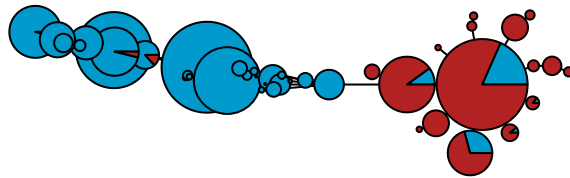

Figure S114. MBPA\_000002500 Metazoa

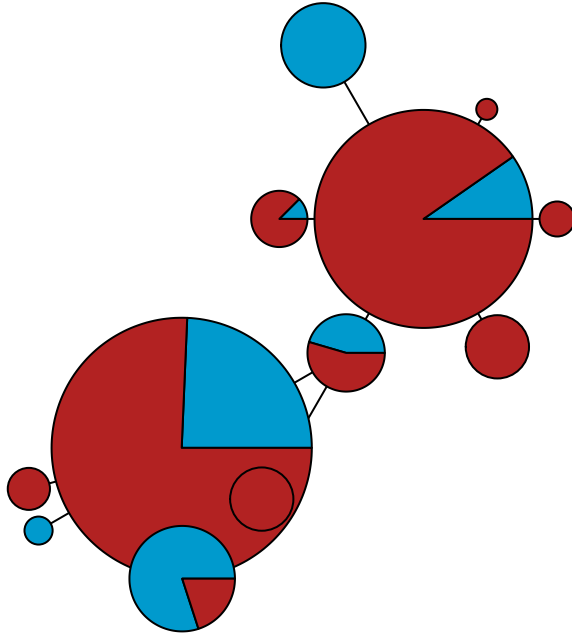

Figure S115. MBPA\_000002581 Metazoa

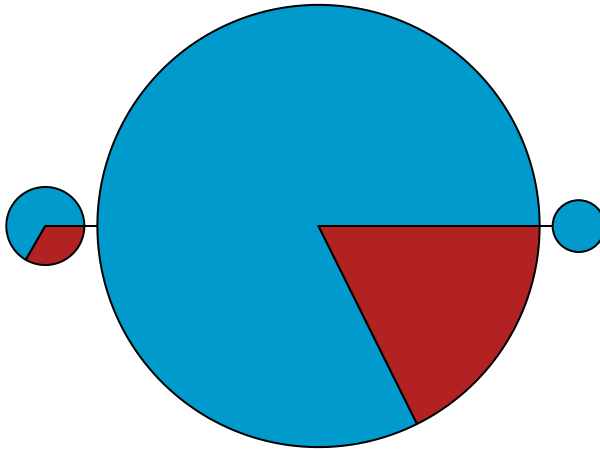

Figure S116. MBPA\_000002597 Rhodophyta

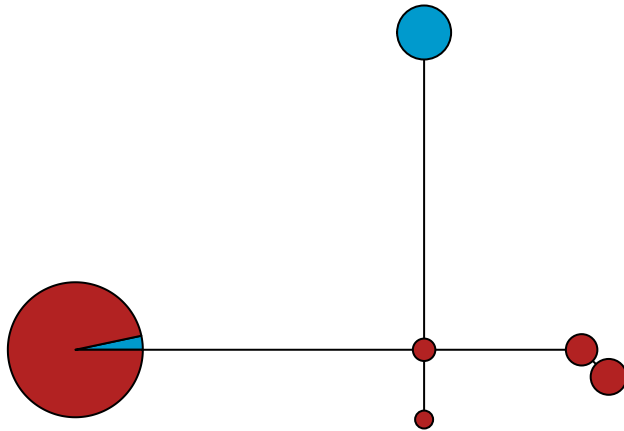

Figure S117. MBPA\_000002708

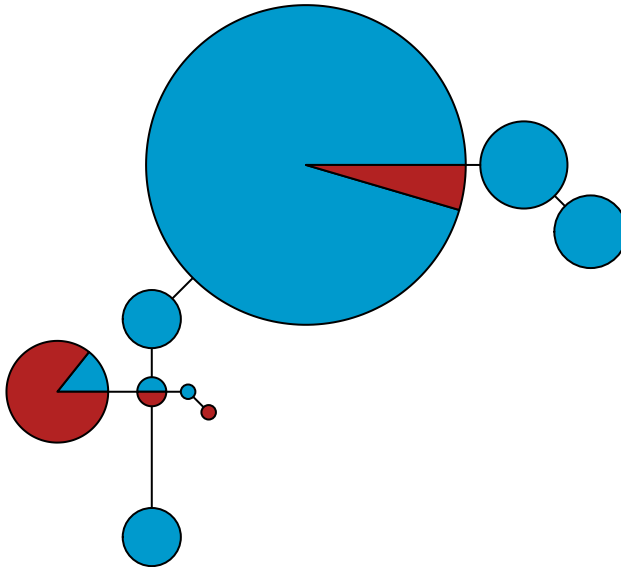

Figure S118. MBPA\_000002792 Rhodophyta

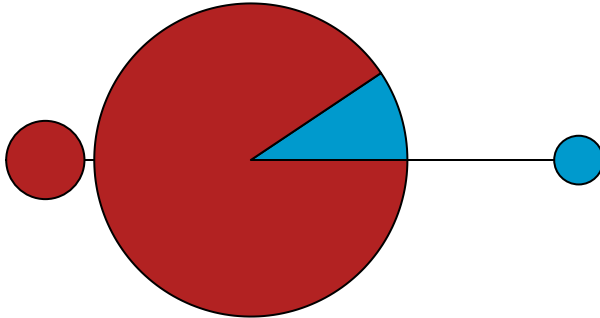

Figure S119. MBPA\_000002796 Metazoa

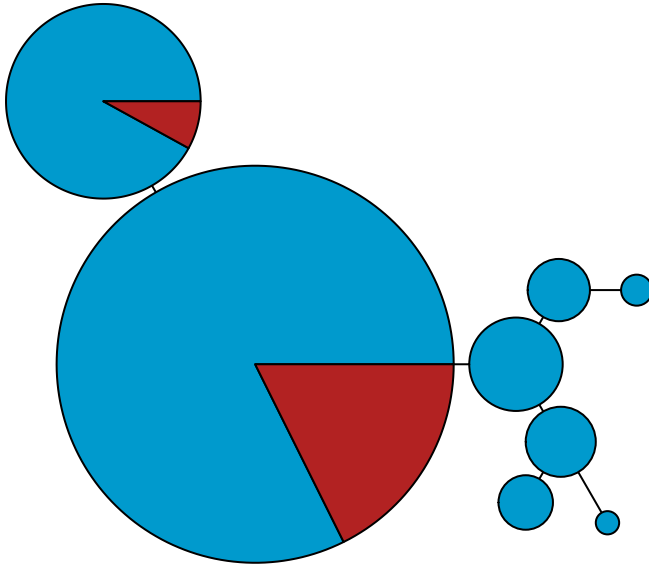



Figure S120. MBPA\_000002801 Stramenopiles

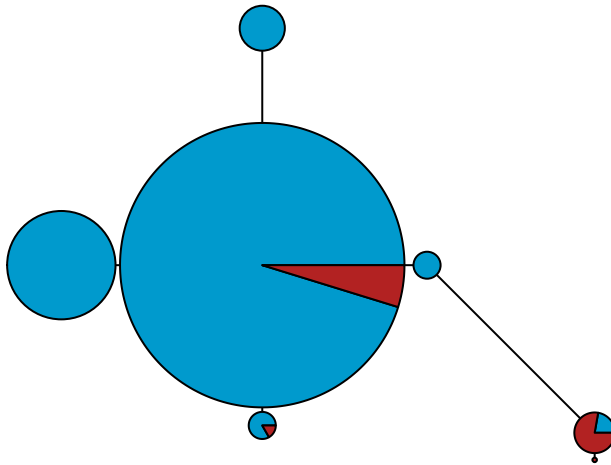

Figure S121. MBPA\_000002808 Metazoa

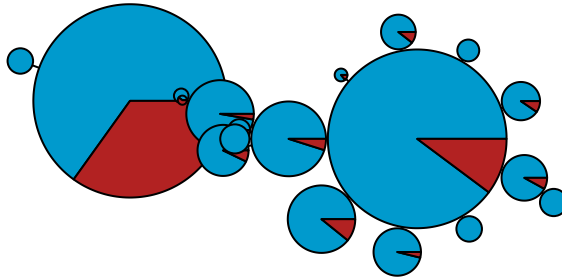

Figure S122. MBPA\_000002905 Metazoa

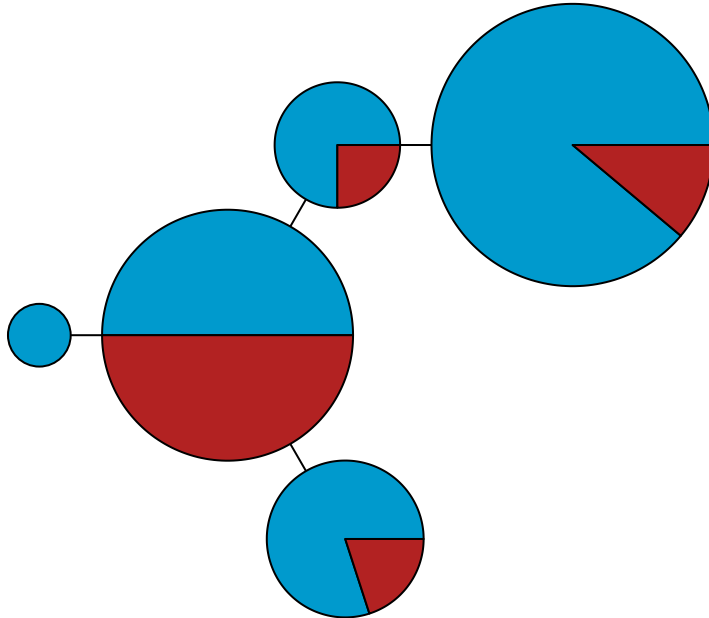

Figure S123. MBPA\_000002906 Metazoa

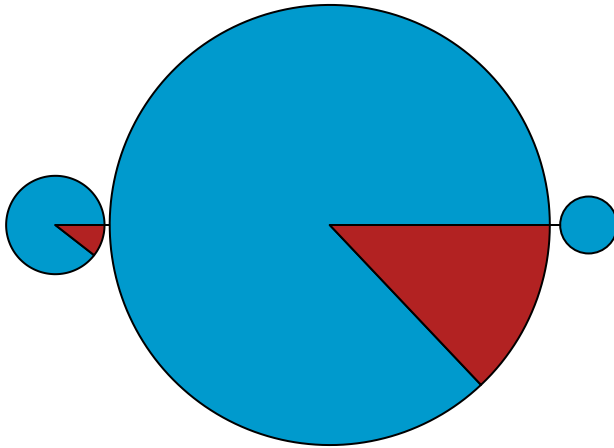

Figure S124. MBPA\_000002932 Metazoa

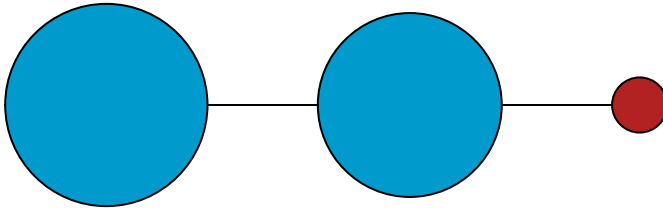

Figure S125. MBPA\_000002984 Rhodophyta

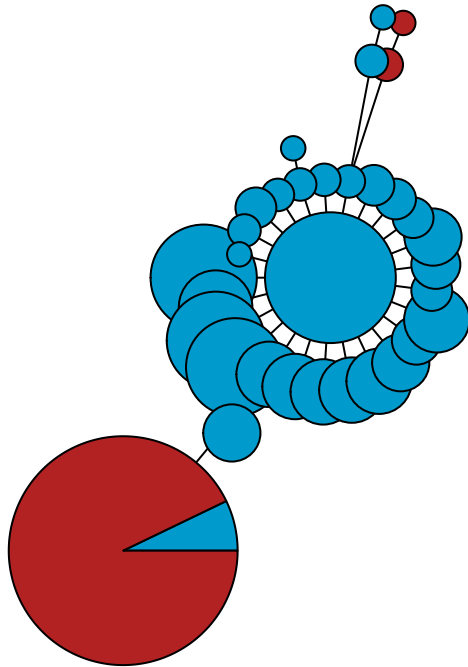

Figure S126. MBPA\_000003116 Metazoa

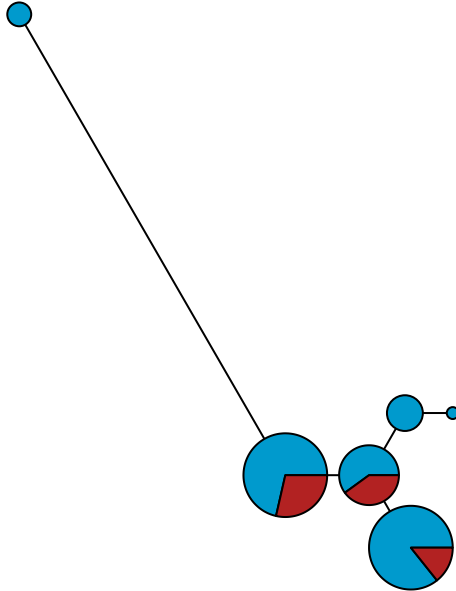

Figure S127. MBPA\_000003133 Metazoa

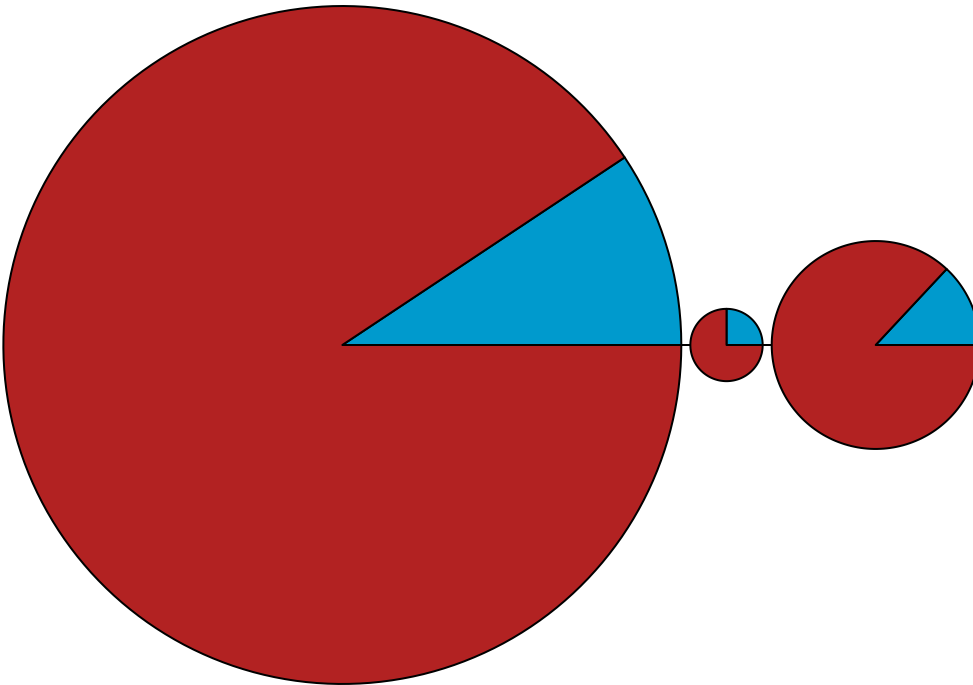



Figure S128. MBPA\_000003178 Metazoa

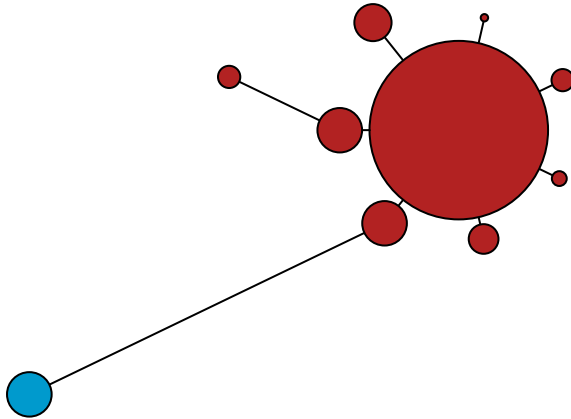

Figure S129. MBPA\_000003207 Metazoa

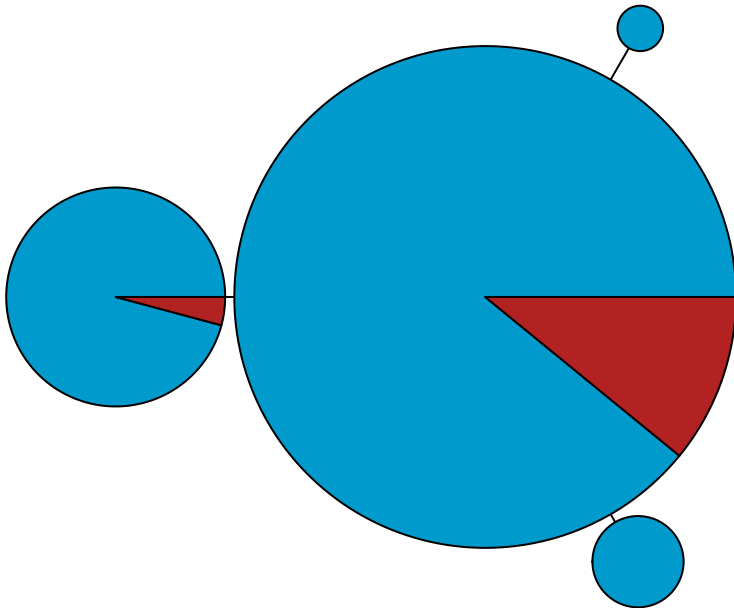

Figure S130. MBPA\_000003261 Metazoa

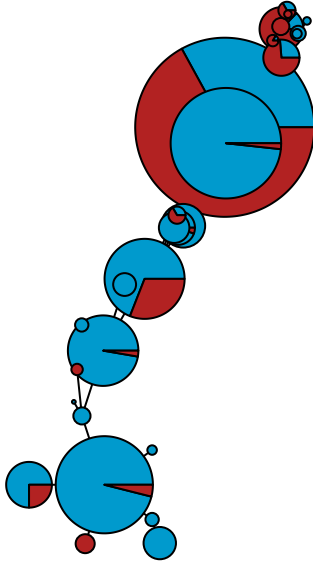

Figure S131. MBPA\_000003289 Stramenopiles

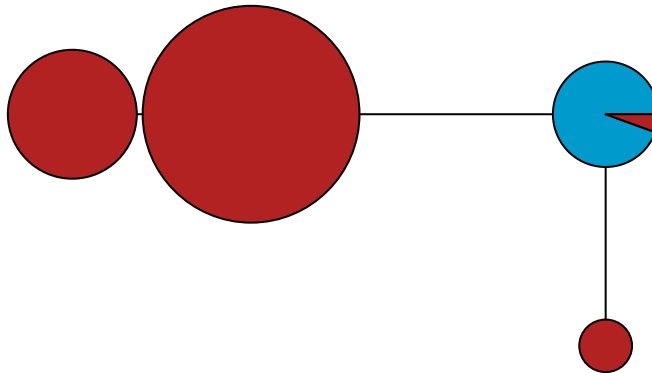

Figure S132. MBPA\_000003295 Stramenopiles

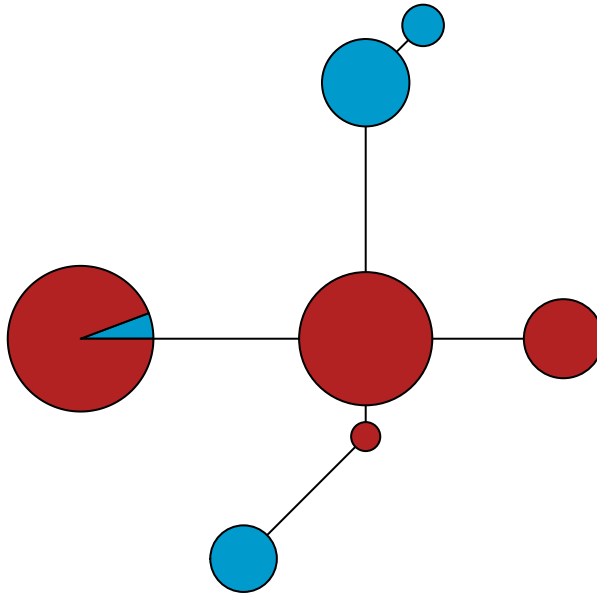

Figure S133. MBPA\_000003304 Metazoa

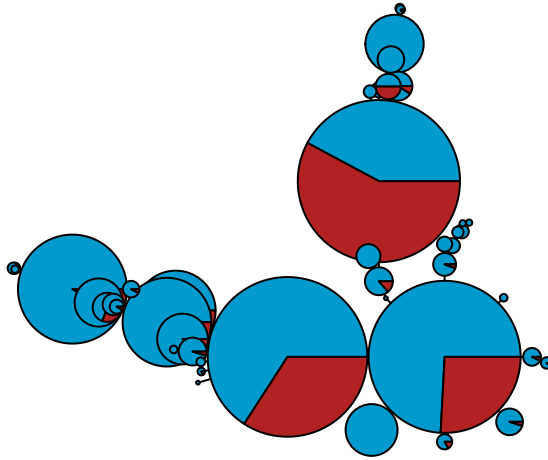

Figure S134. MBPA\_000003418 Metazoa

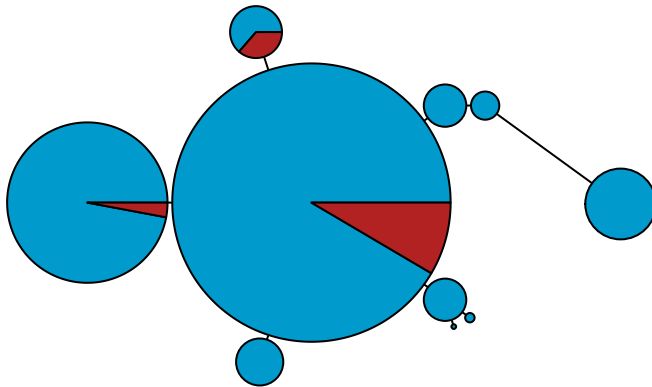

Figure S135. MBPA\_000003528 Metazoa

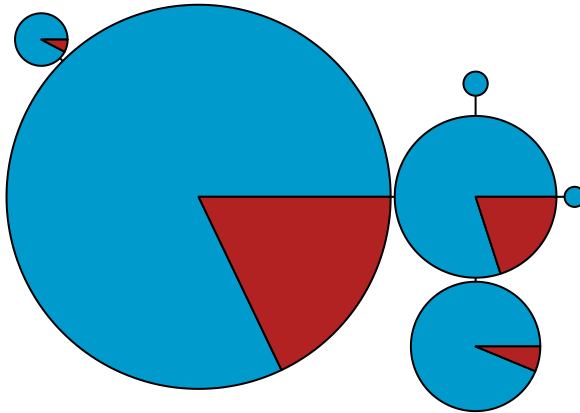





Figure S137. MBPA\_000003535 Metazoa

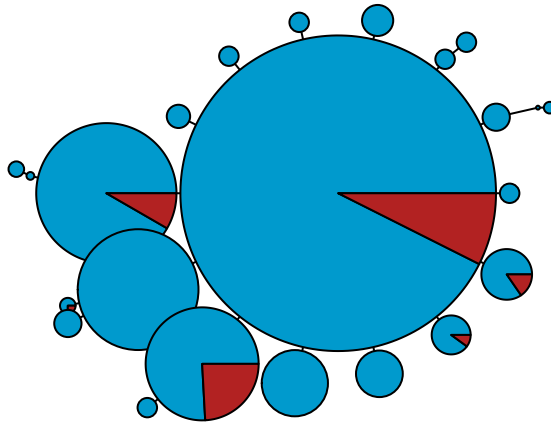

Figure S138. MBPA\_000003542 Rhodophyta

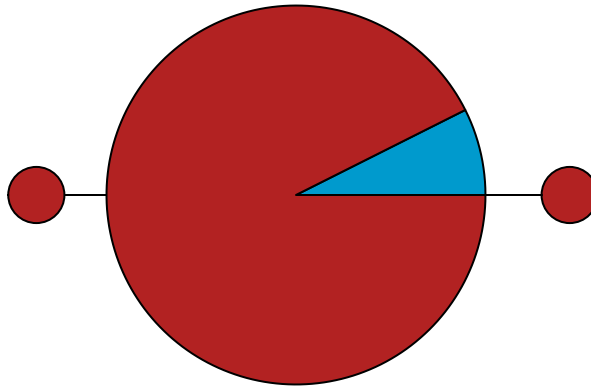

Figure S139. MBPA\_000003576 Metazoa

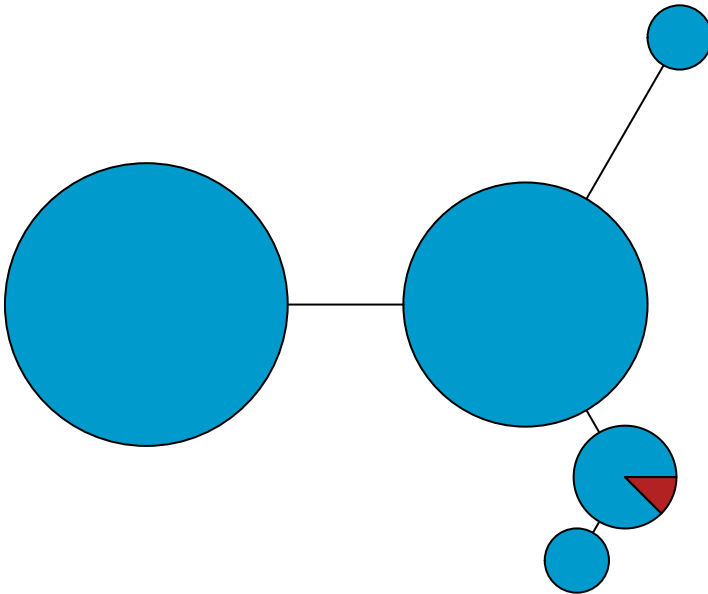

Figure S140. MBPA\_000003744 Metazoa

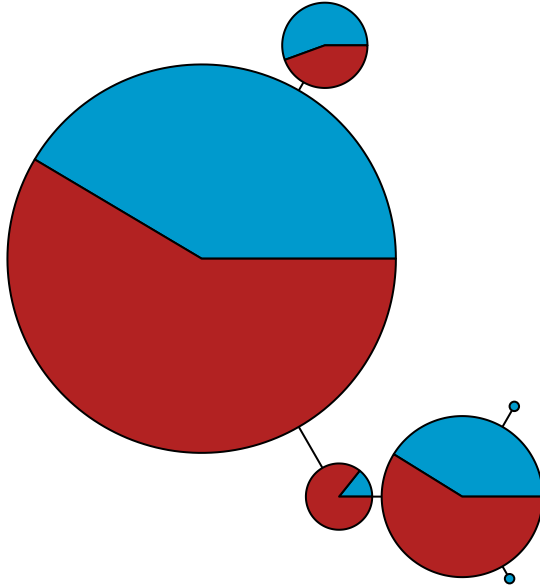

Figure S141. MBPA\_000003840 Metazoa

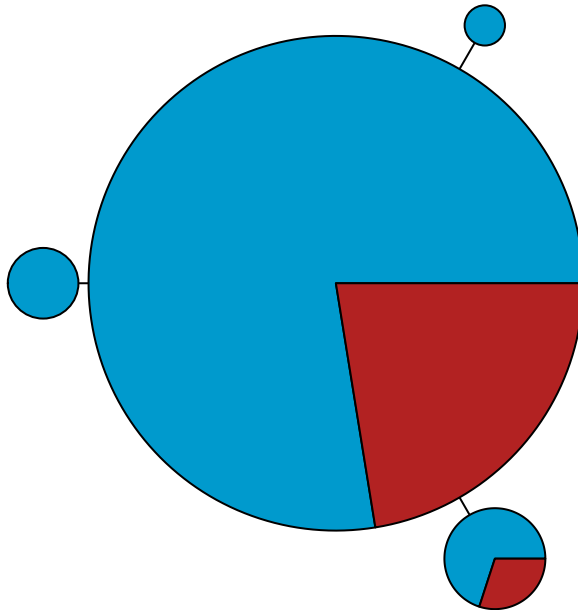

Figure S142. MBPA\_000003904 Metazoa

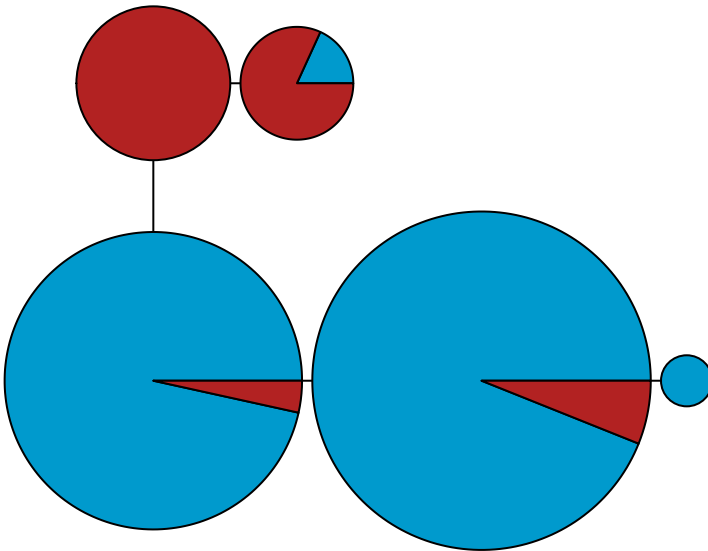

Figure S143. MBPA\_000003913 Metazoa

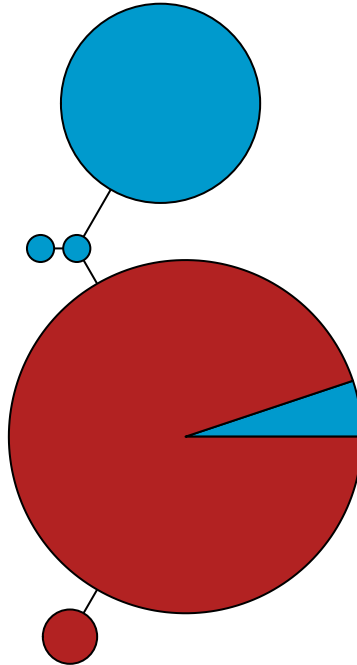





Figure S145. MBPA\_000004294 Metazoa

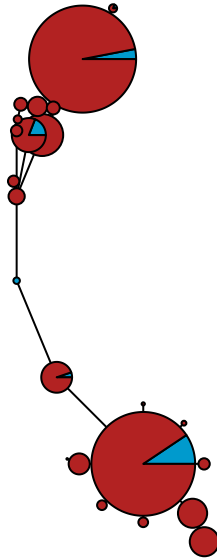

Figure S146. MBPA\_000004478 Metazoa

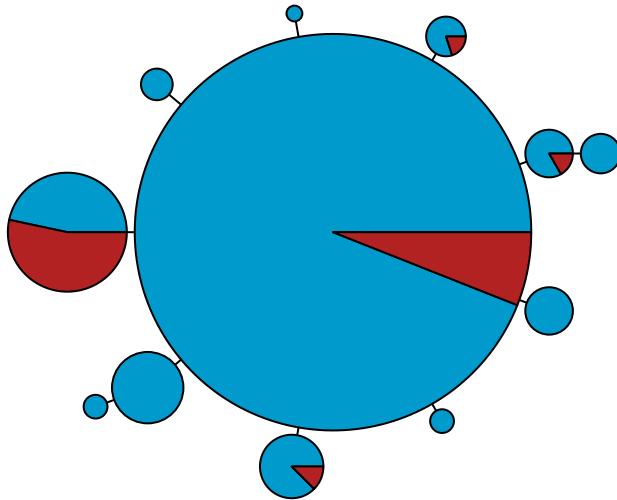

Figure S147. MBPA\_000004483 Metazoa

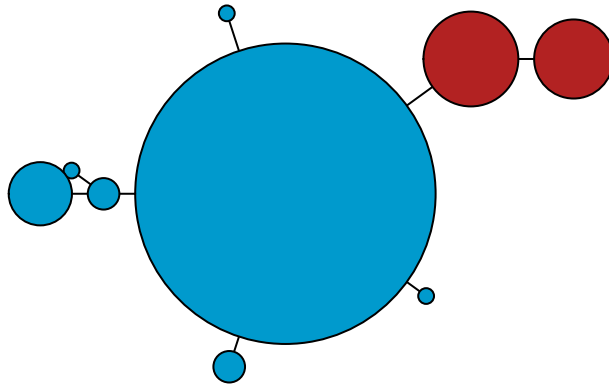

Figure S148. MBPA\_000004503

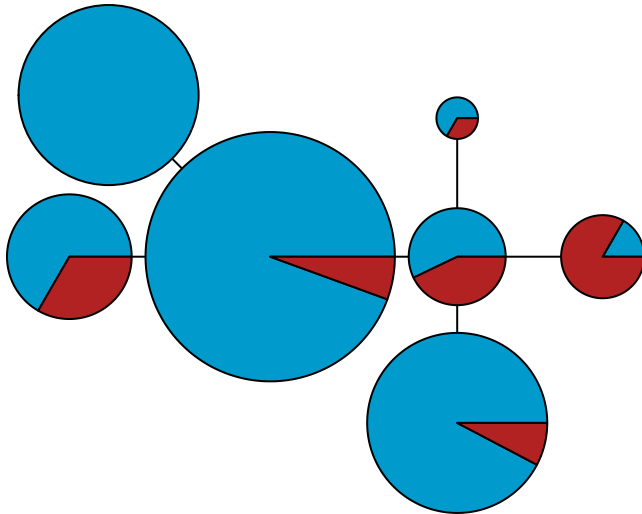

Figure S149. MBPA\_000004561 Stramenopiles

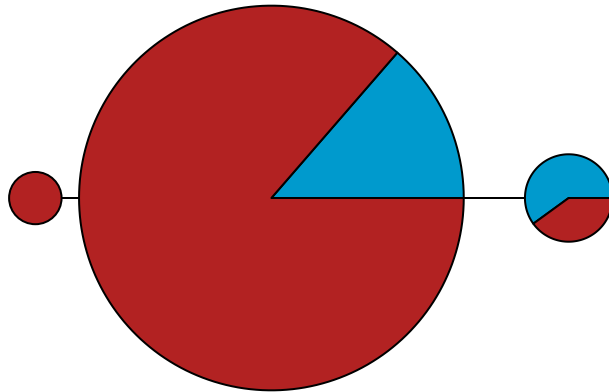

Figure S150. MBPA\_000004645 Metazoa

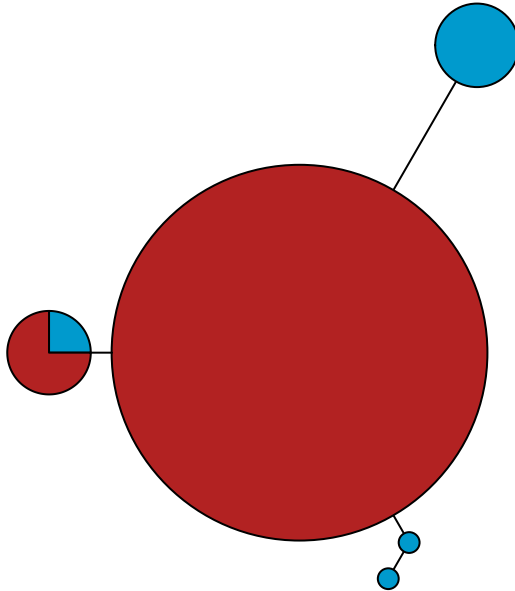

Figure S151. MBPA\_000004675 Rhodophyta

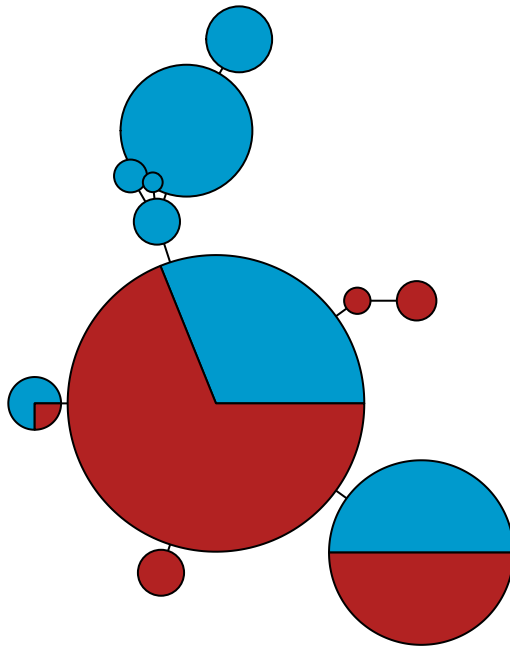



Figure S152. MBPA\_000004681

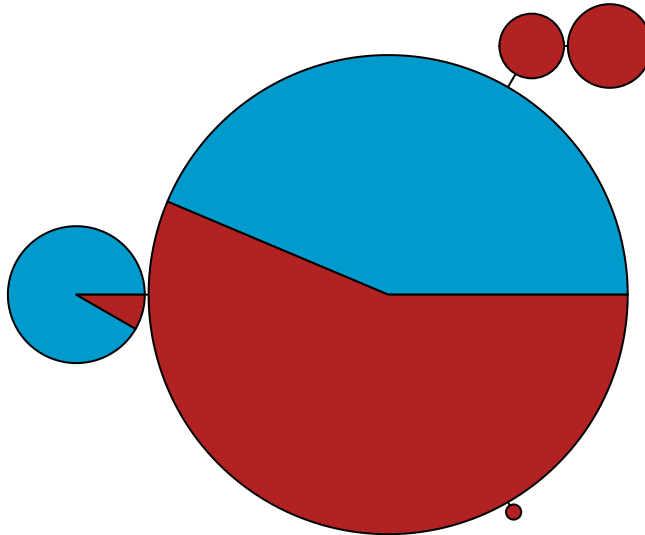

Figure S153. MBPA\_000004688 Stramenopiles

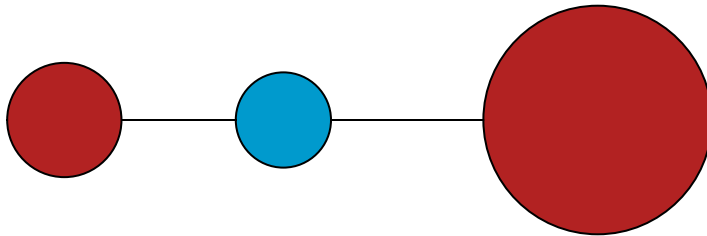

Figure S154. MBPA\_000004696

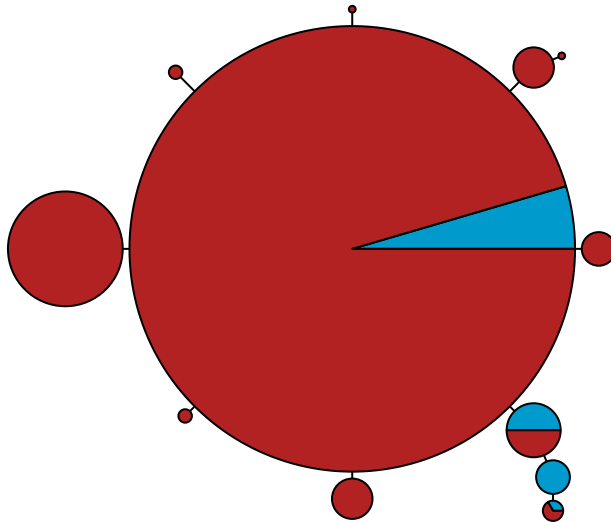

Figure S155. MBPA\_000004765 Metazoa

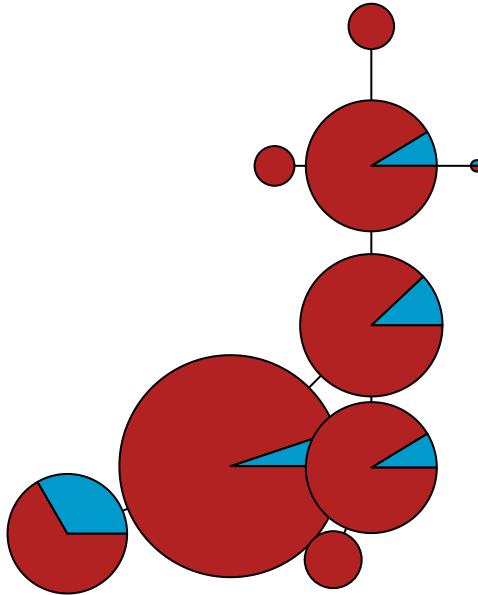

Figure S156. MBPA\_000004906 Metazoa

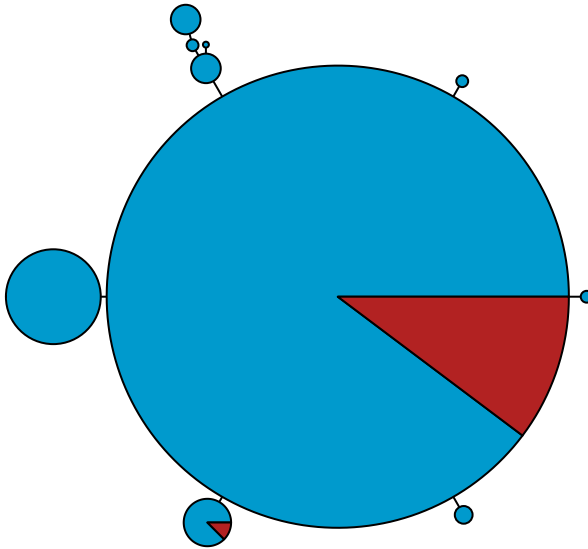

Figure S157. MBPA\_000005170 Metazoa

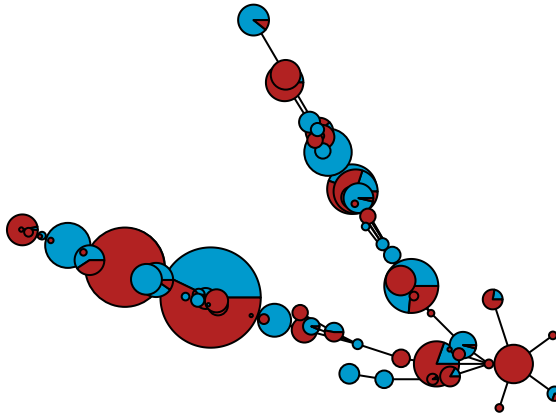

Figure S158. MBPA\_000005205 Rhodophyta

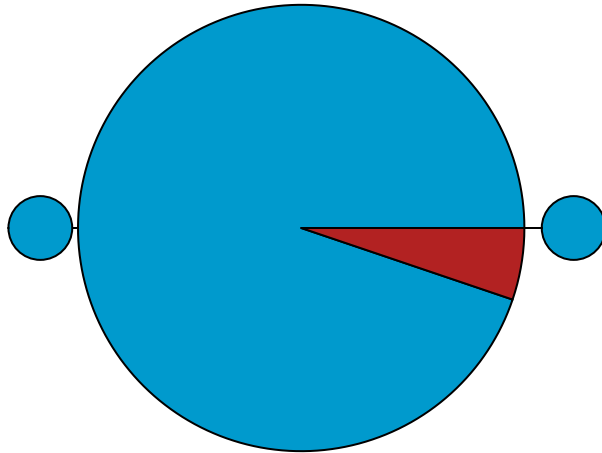

Figure S159. MBPA\_000005225 Metazoa

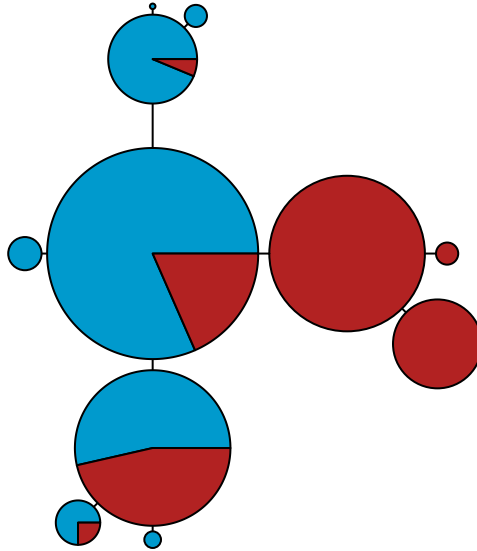



Figure S160. MBPA\_000005265 Metazoa

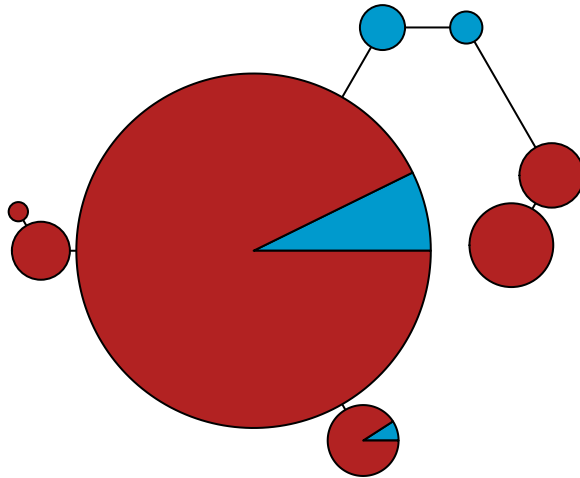

Figure S161. MBPA\_000005365 Metazoa

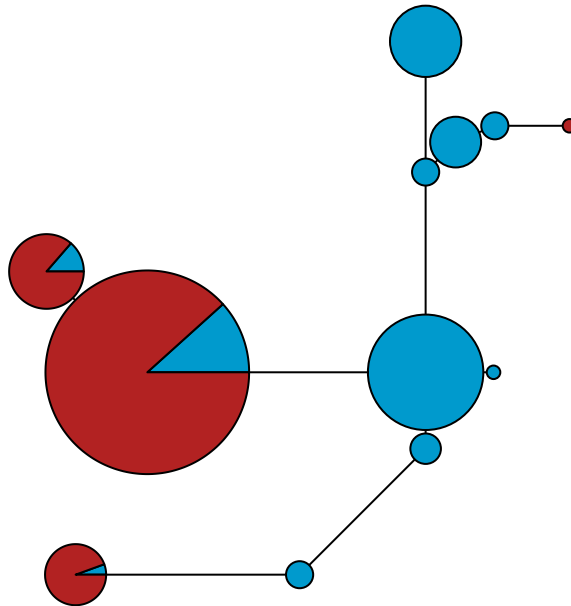

Figure S162. MBPA\_000005379 Metazoa

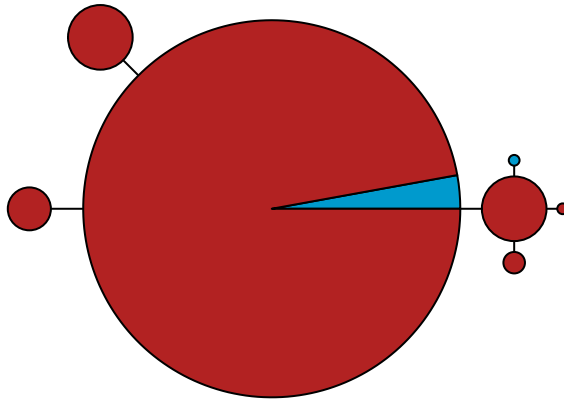

Figure S163. MBPA\_000005497 Metazoa

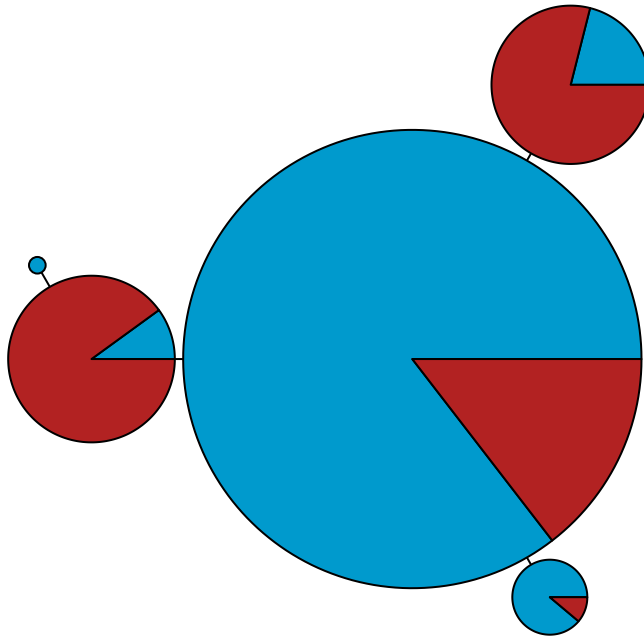

Figure S164. MBPA\_000005561 Metazoa

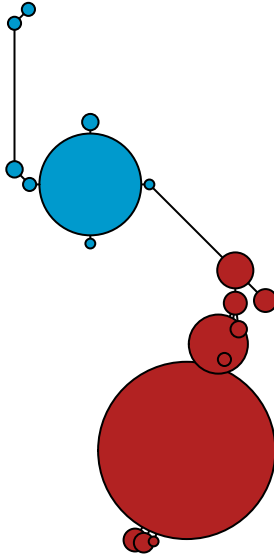

Figure S165. MBPA\_000005961 Metazoa

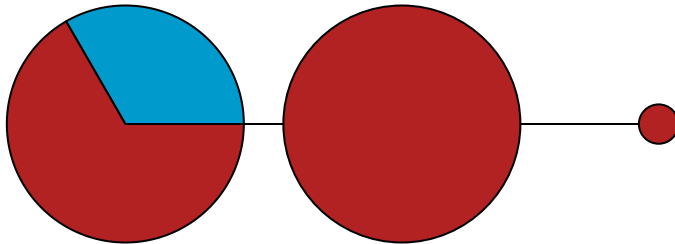

Figure S166. MBPA\_000006003 Rhodophyta

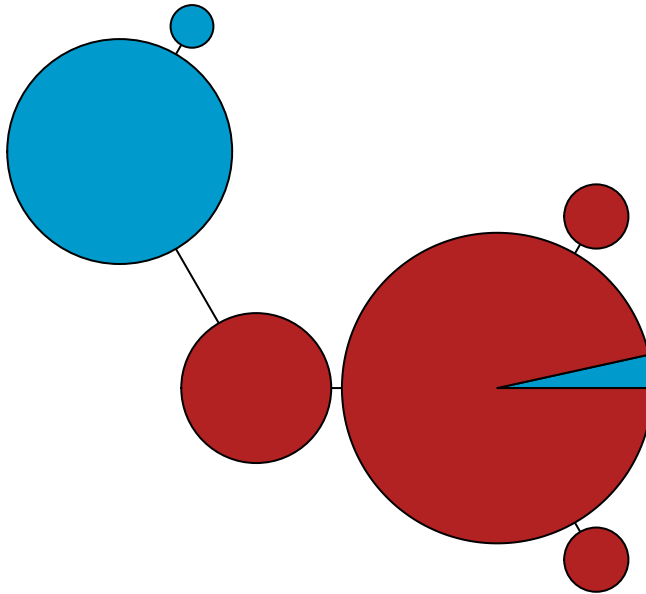

Figure S167. MBPA\_000006026 Metazoa

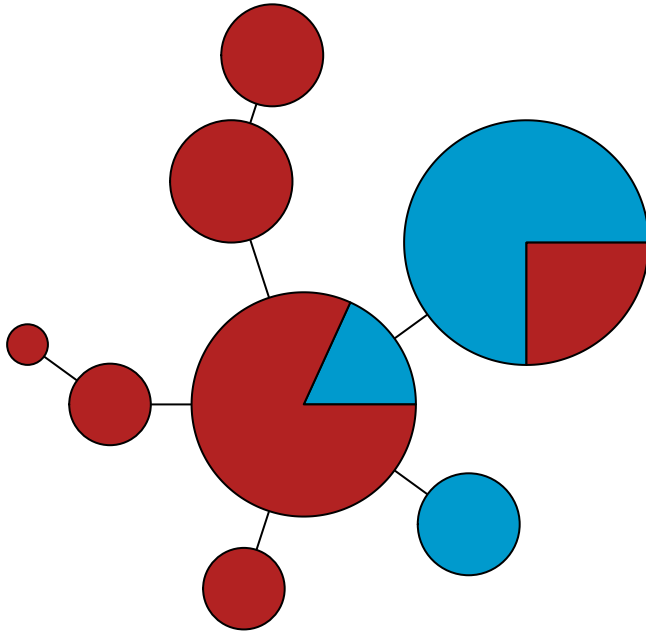



Figure S168. MBPA\_000006050 Rhodophyta

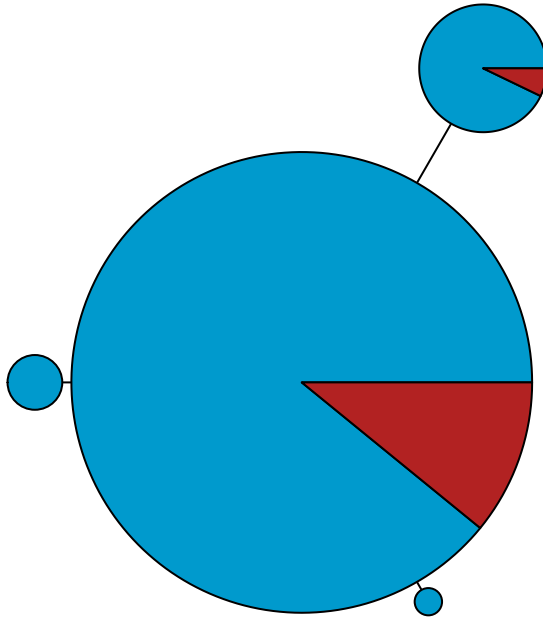

Figure S169. MBPA\_000006086 Rhodophyta

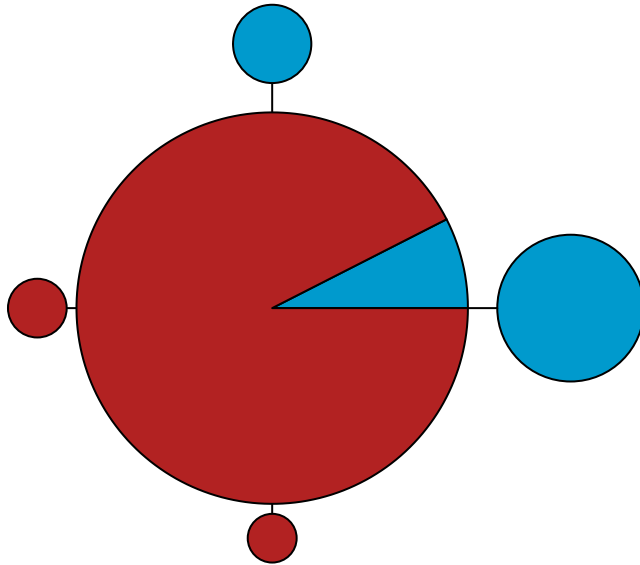

Figure S170. MBPA\_000006103 Metazoa

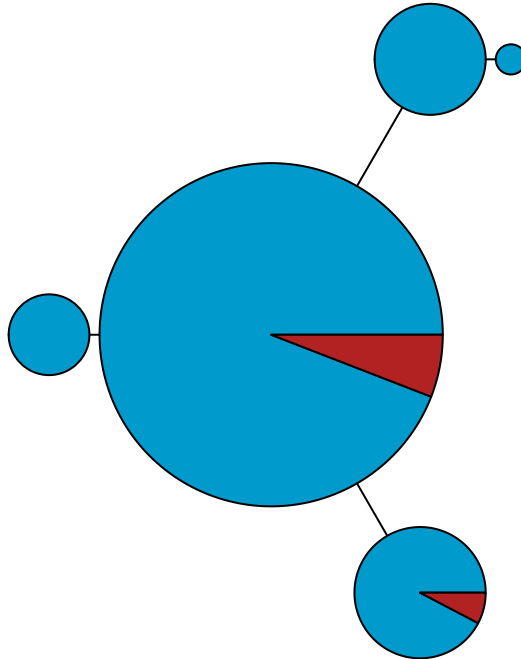

Figure S171. MBPA\_000006224

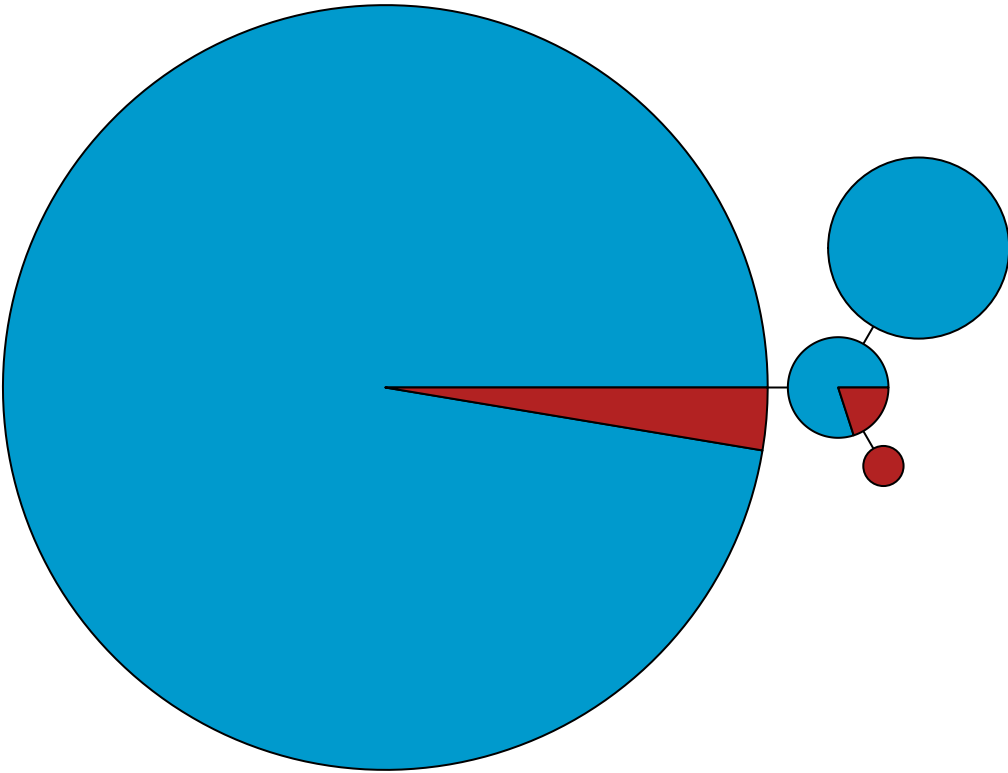

Figure S172. MBPA\_000006572 Rhodophyta

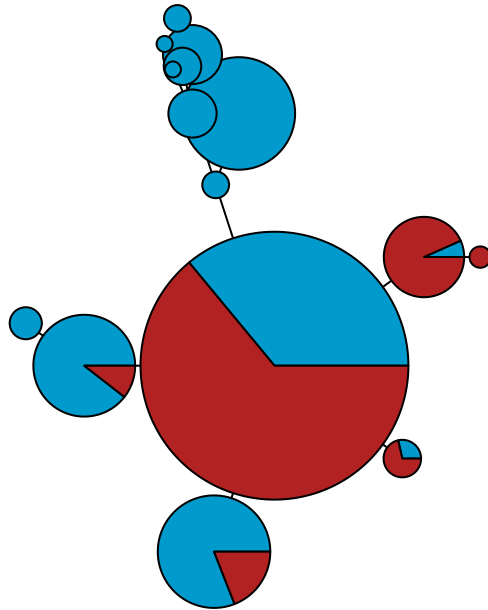

Figure S173. MBPA\_000006708 Rhodophyta

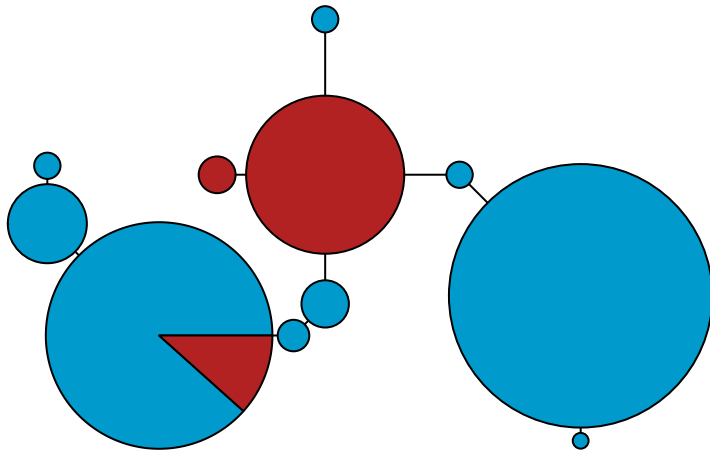

Figure S174. MBPA\_000006823 Metazoa

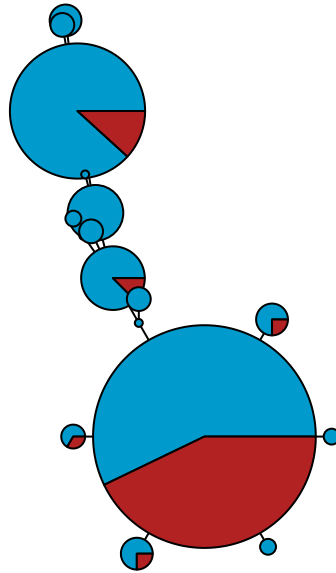

Figure S175. MBPA\_000006837

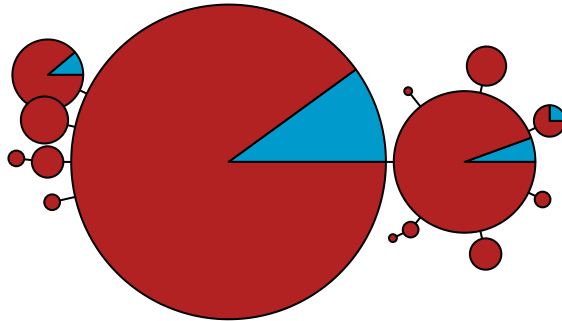



Figure S176. MBPA\_000007078 Metazoa

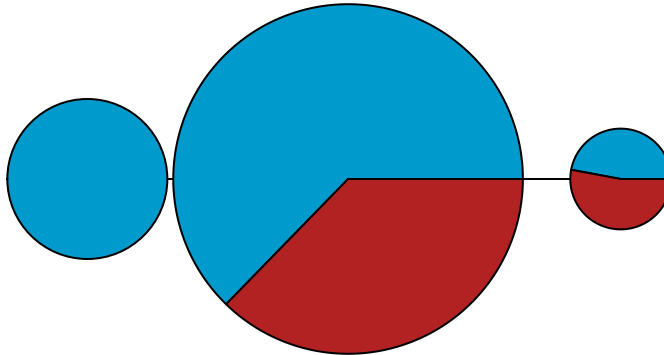

Figure S177. MBPA\_000007262

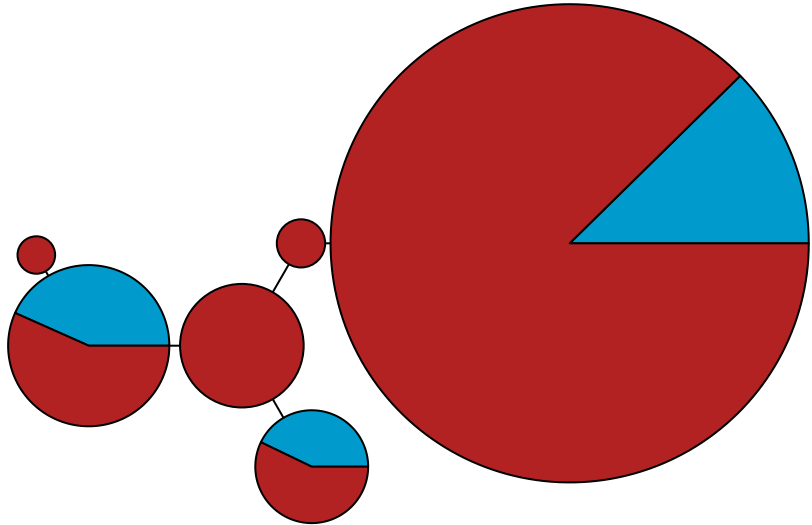



Figure S179. MBPA\_000007328

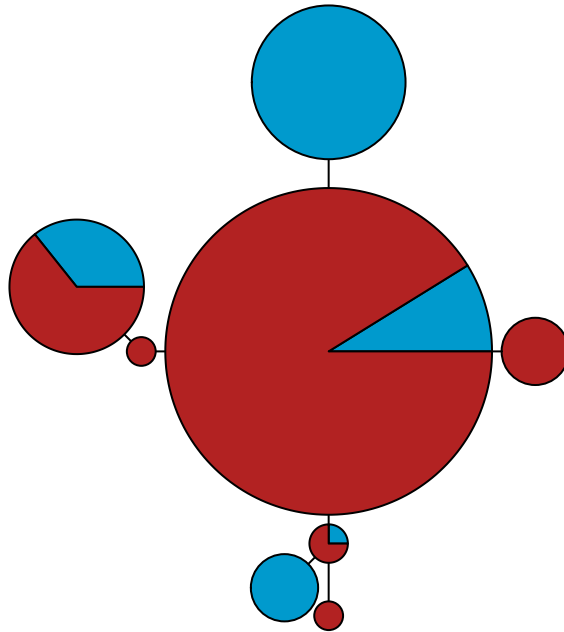

Figure S180. MBPA\_000007354

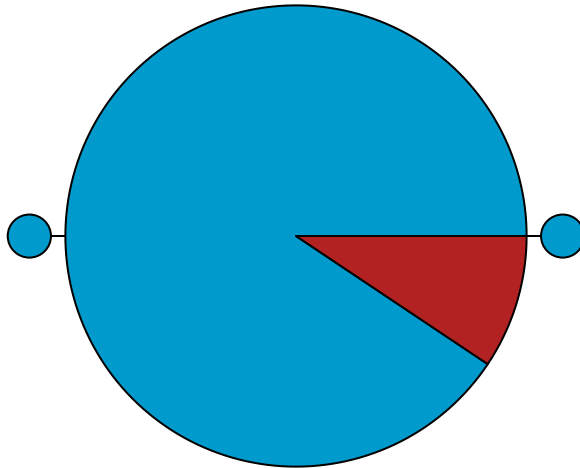

Figure S181. MBPA\_000007400 Rhodophyta

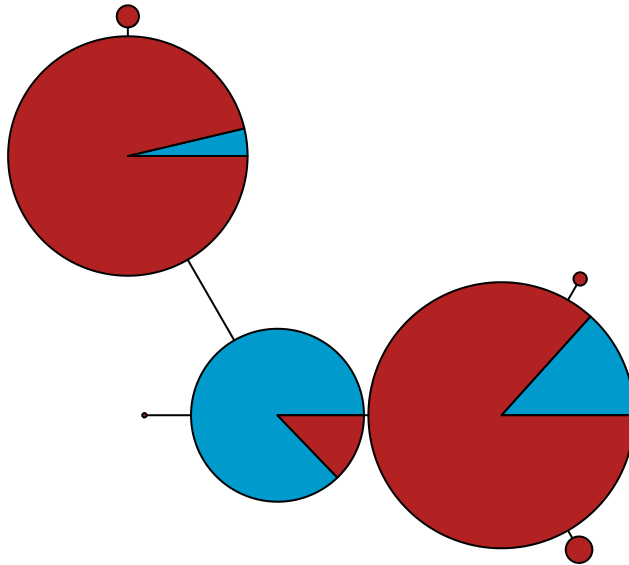

Figure S182. MBPA\_000007428 Lobosa

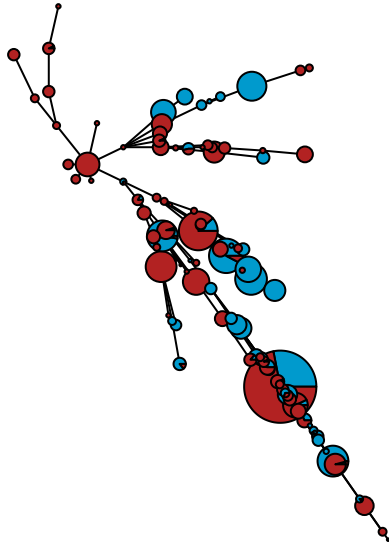

Figure S183. MBPA\_000007461 Rhodophyta

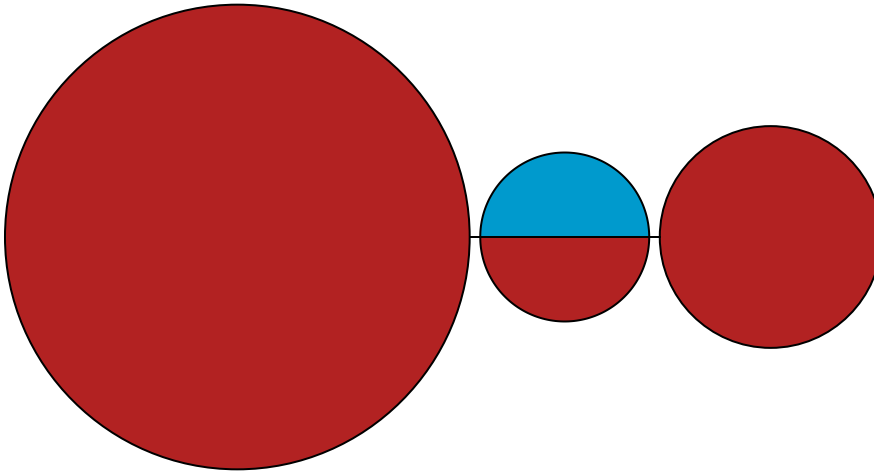



Figure S184. MBPA\_000007565 Stramenopiles

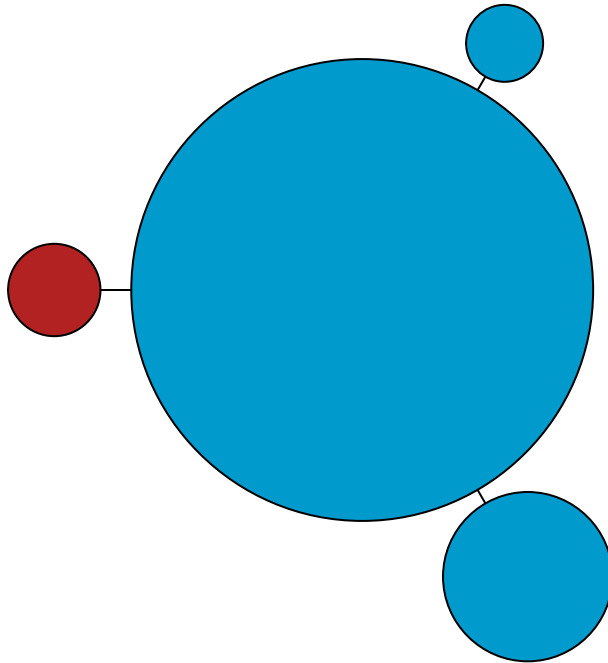

Figure S185. MBPA\_000007571 Metazoa

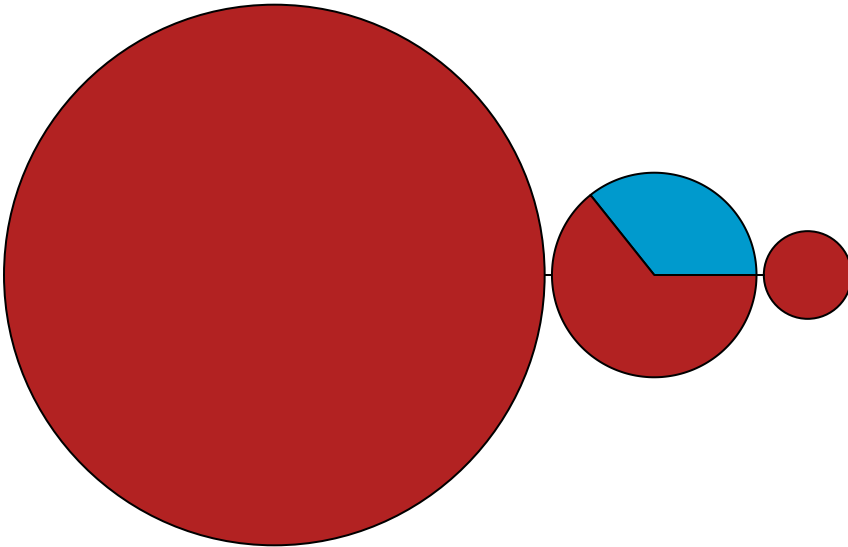

Figure S186. MBPA\_000007824 Metazoa

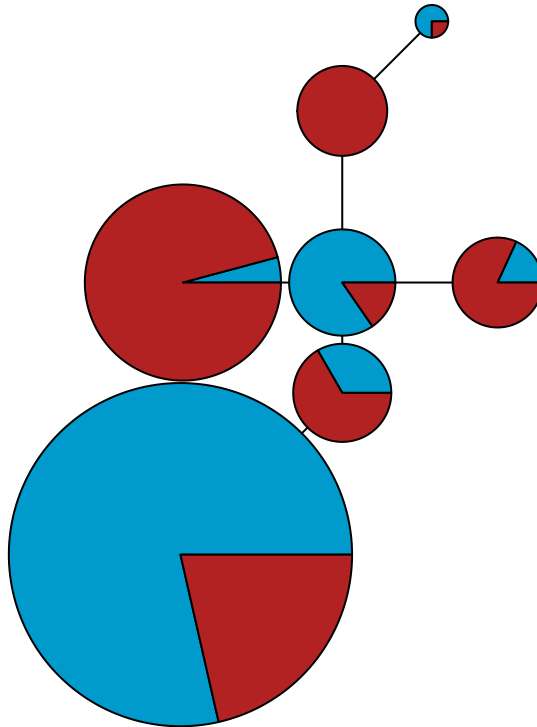

Figure S187. MBPA\_000007825 Stramenopiles

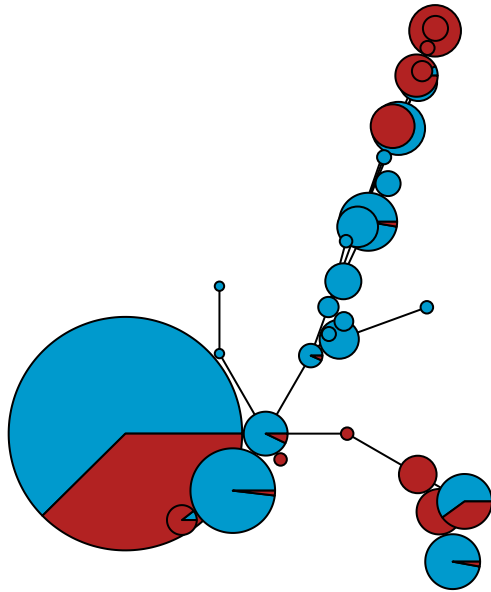

Figure S188. MBPA\_000007879 Rhodophyta

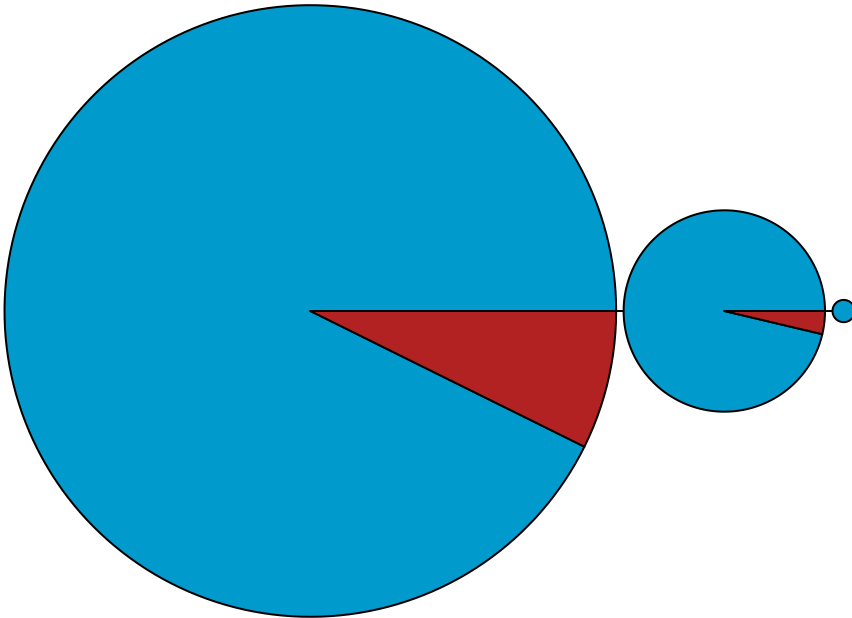

Figure S189. MBPA\_000007980 Stramenopiles

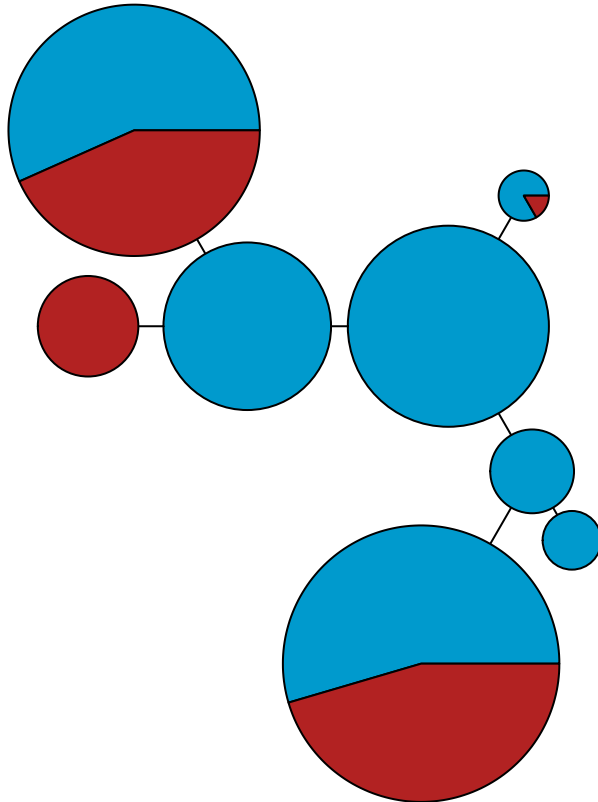

Figure S190. MBPA\_000007992 Metazoa

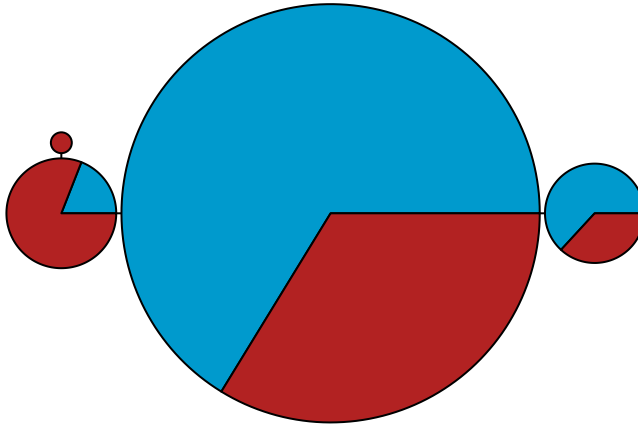

Figure S191. MBPA\_000008054 Metazoa

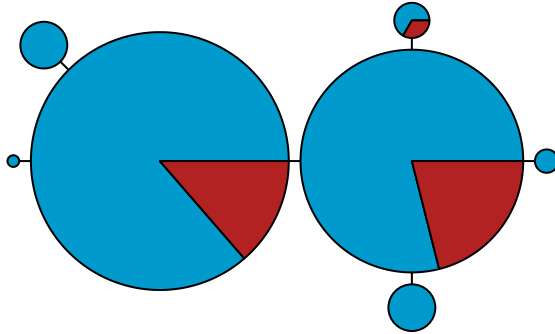



Figure S192. MBPA\_000008072

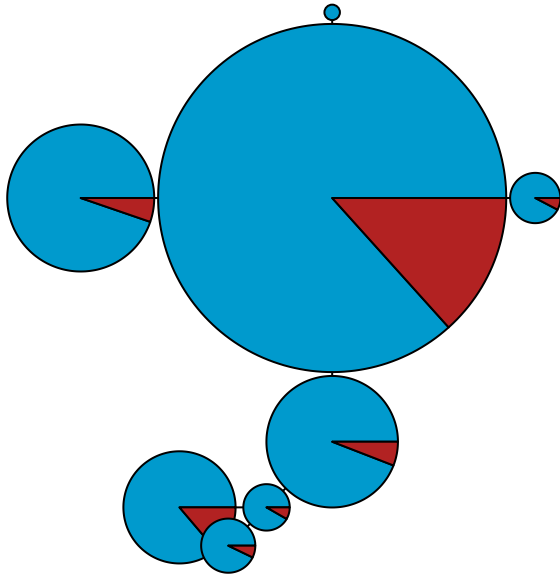

Figure S193. MBPA\_000008077

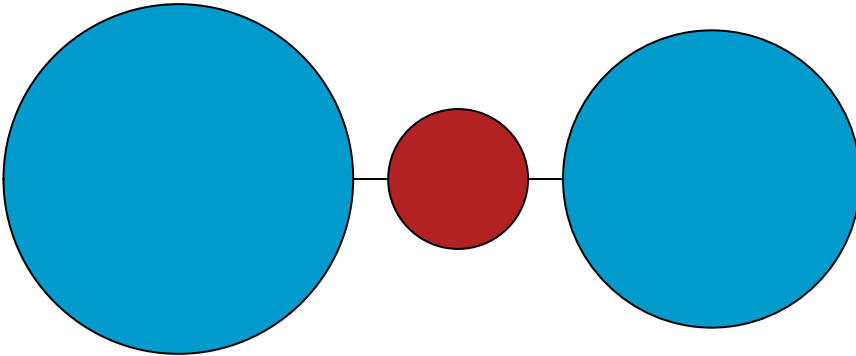

Figure S194. MBPA\_000008180 Metazoa

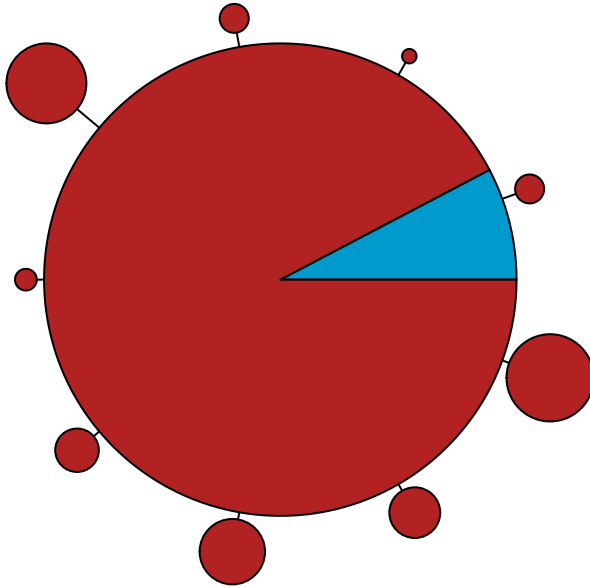

Figure S195. MBPA\_000008254 Viridiplantae

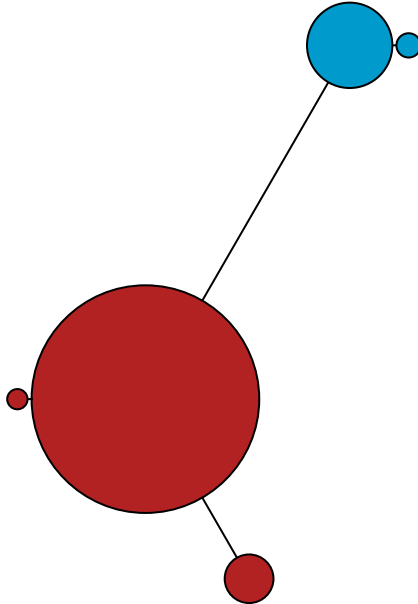

Figure S196. MBPA\_000008348 Rhodophyta

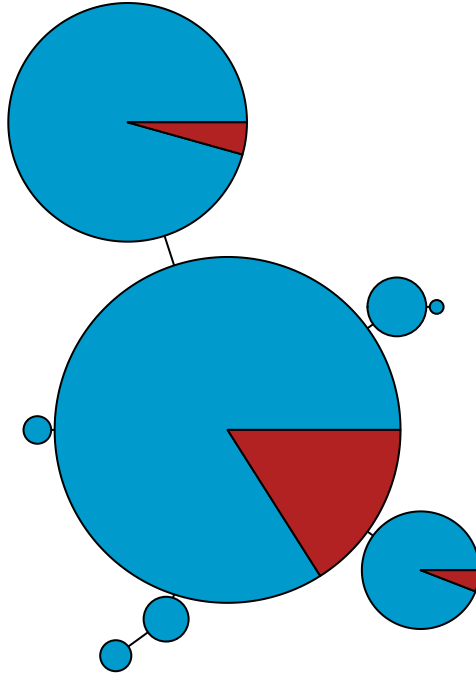

Figure S197. MBPA\_000008447 Rhodophyta

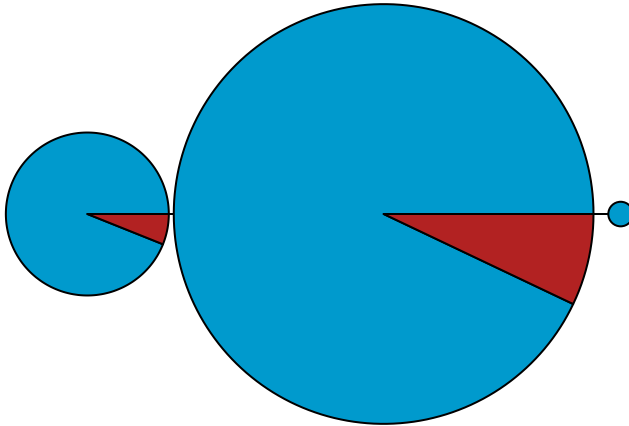

Figure S198. MBPA\_000008678 Rhodophyta

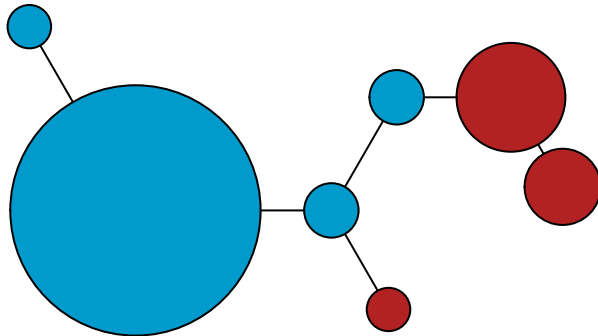

Figure S199. MBPA\_000008816 Rhodophyta

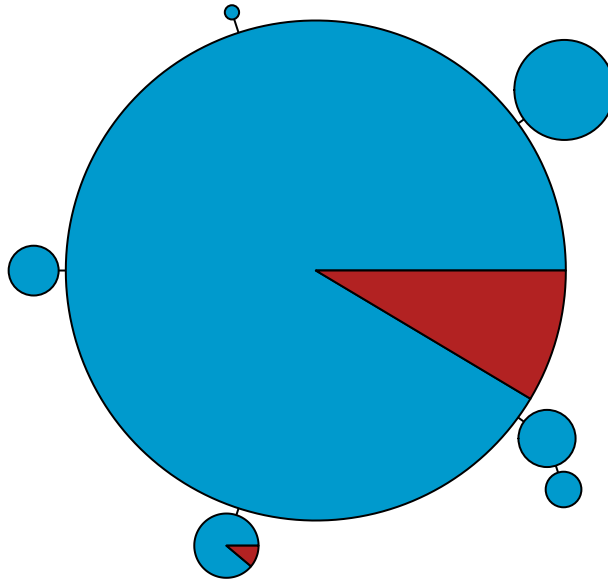



Figure S200. MBPA\_000009011 Metazoa

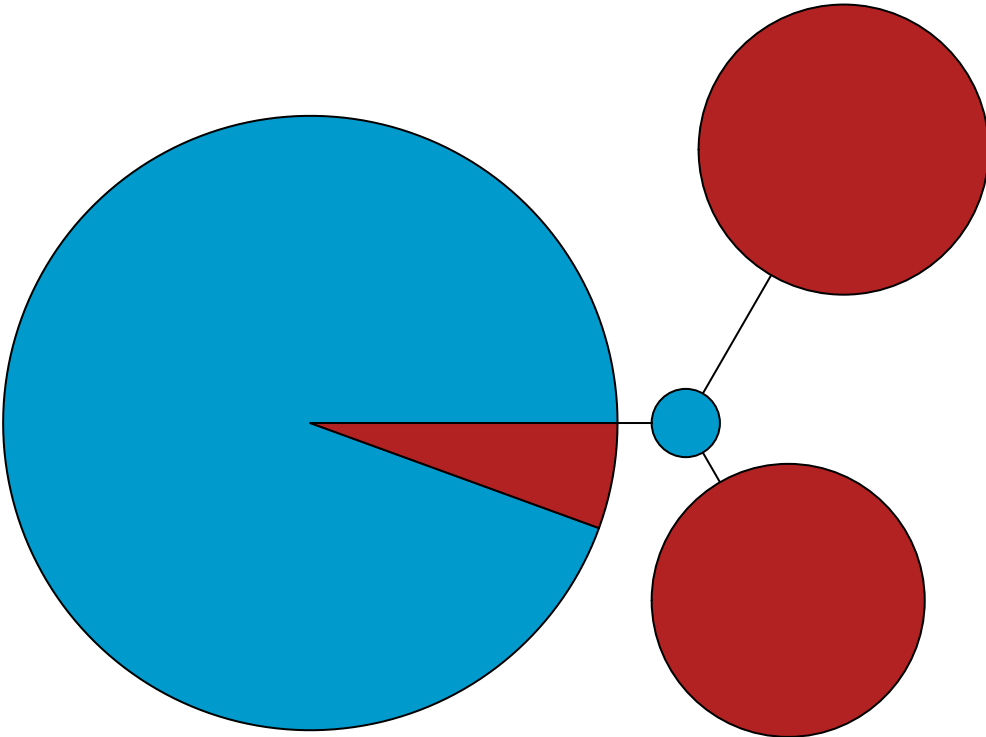

Figure S201. MBPA\_000009042 Metazoa

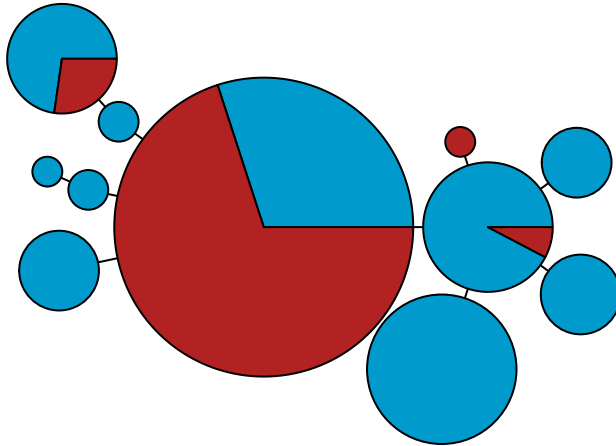

Figure S202. MBPA\_000009116 Metazoa

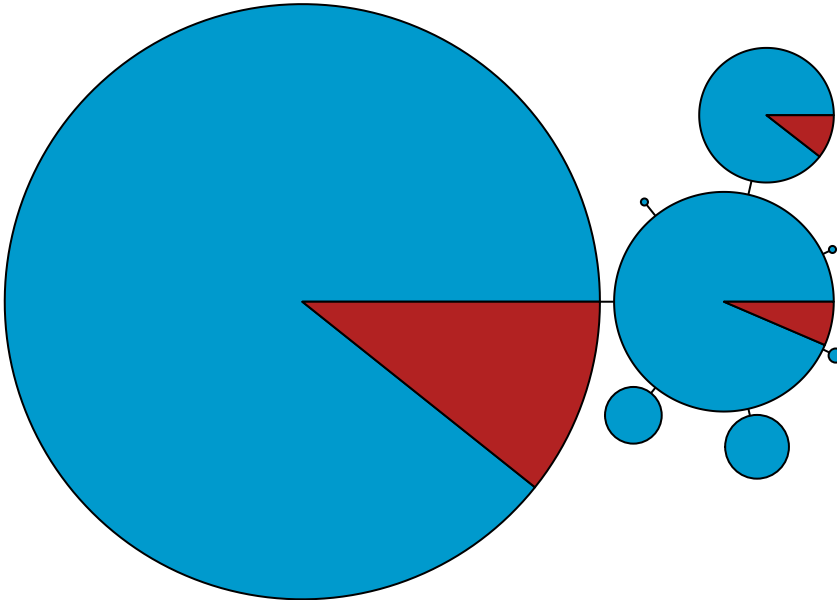

Figure S203. MBPA\_000009268

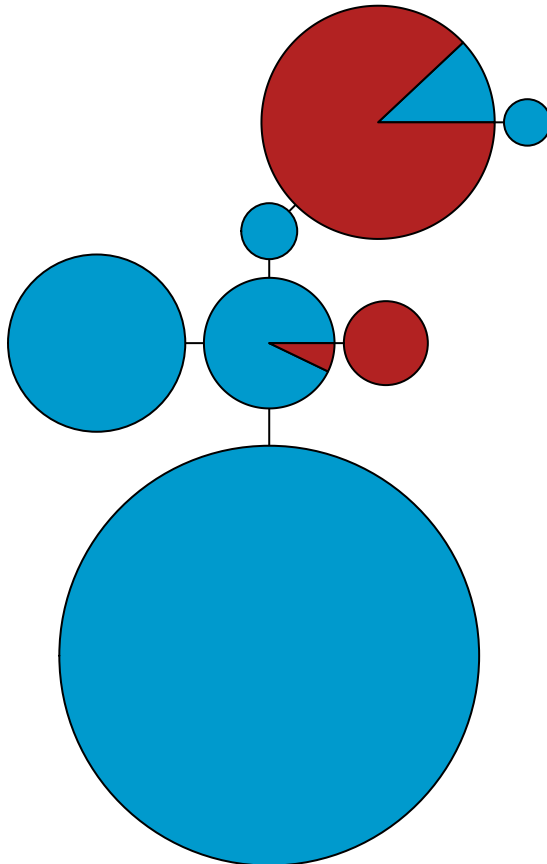

Figure S204. MBPA\_000009366 Metazoa

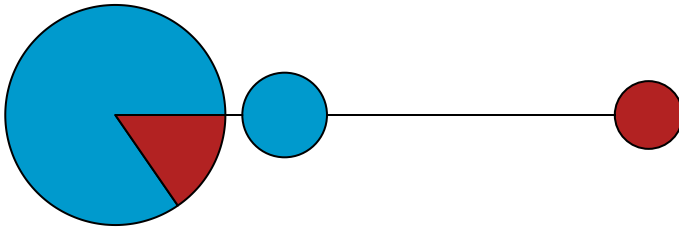

Figure S205. MBPA\_000009385 Metazoa

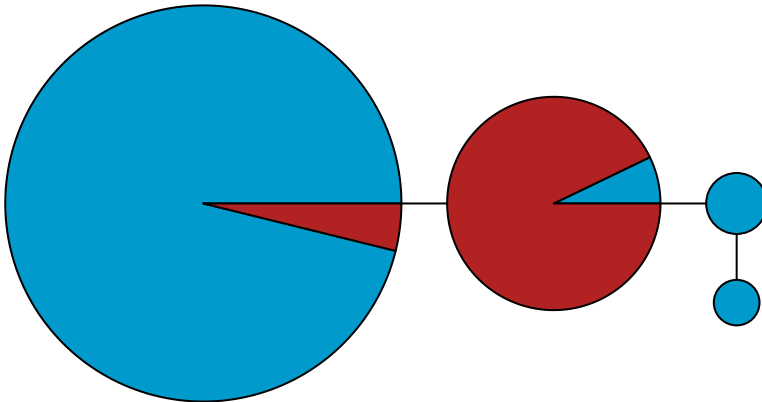

Figure S206. MBPA\_000009450 Metazoa

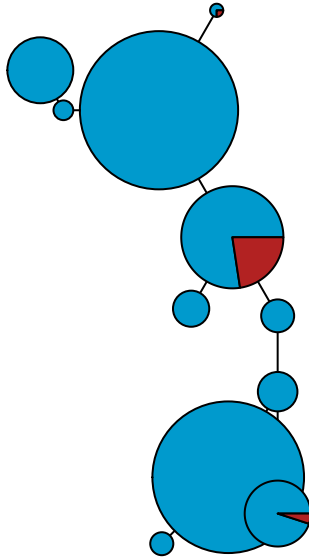

Figure S207. MBPA\_000009497 Metazoa

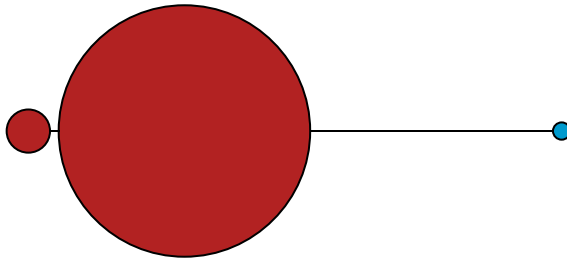



Figure S208. MBPA\_000009522 Metazoa

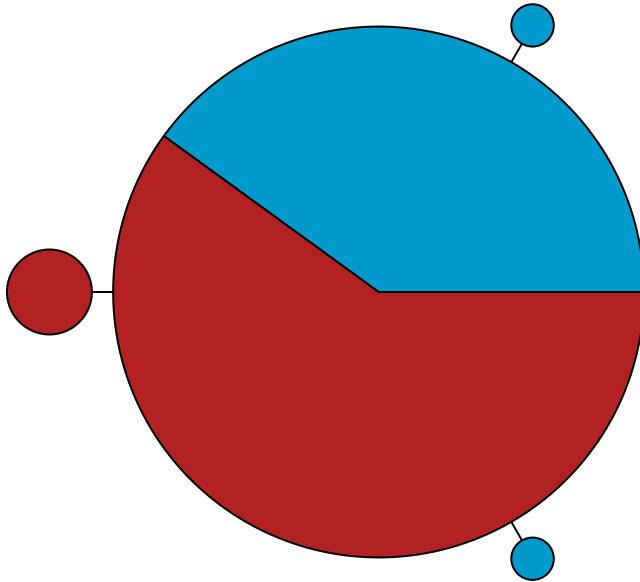

Figure S209. MBPA\_000009591 Metazoa

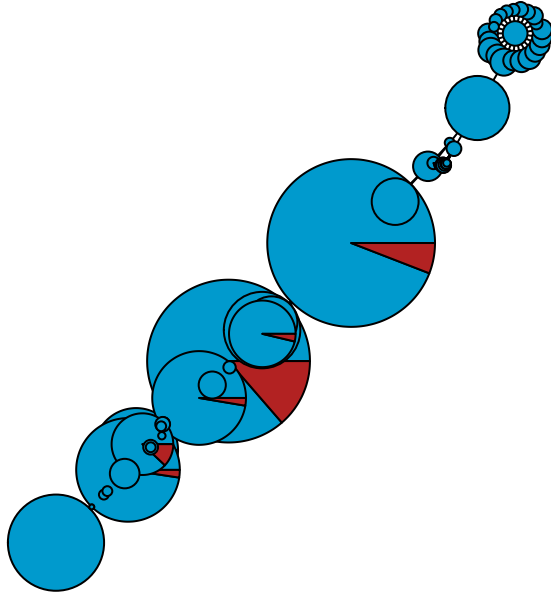

Figure S210. MBPA\_000009603 Stramenopiles

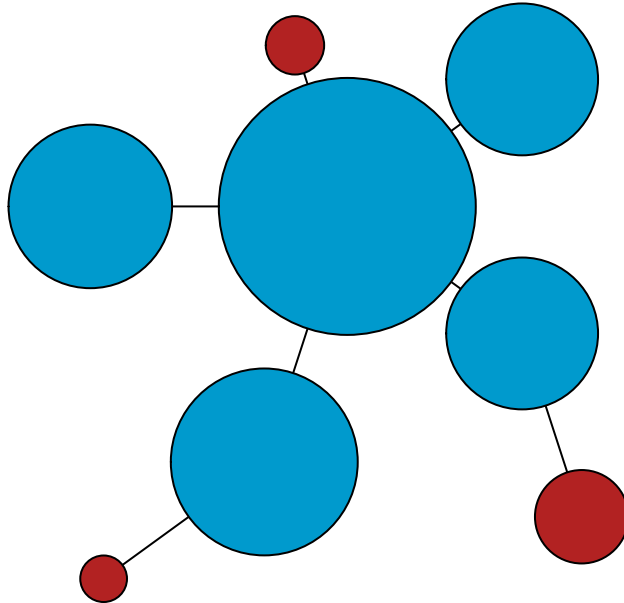

Figure S211. MBPA\_000009968 Metazoa

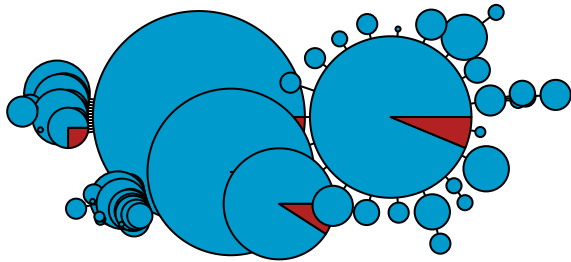

Figure S212. MBPA\_000010095 Metazoa

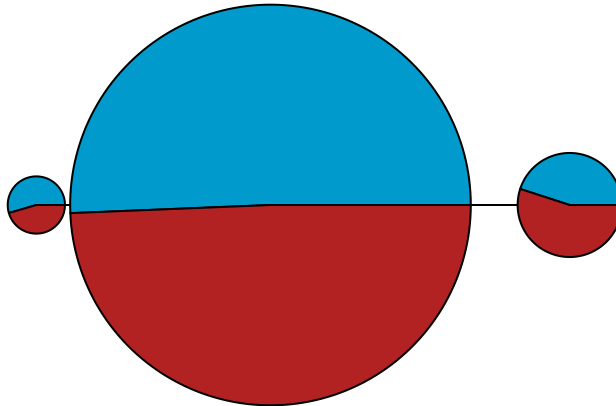

Figure S213. MBPA\_000010185 Metazoa

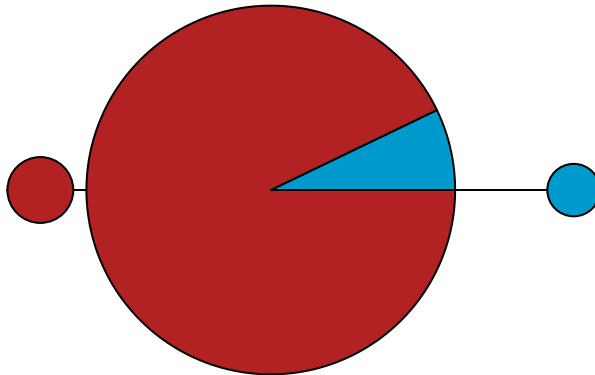

Figure S214. MBPA\_000010283 Metazoa

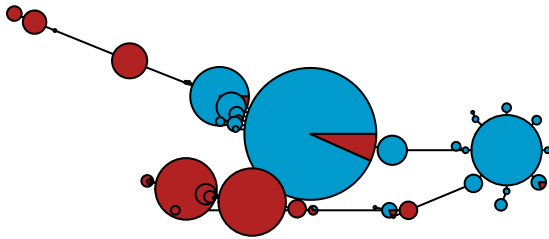

Figure S215. MBPA\_000010863 Metazoa

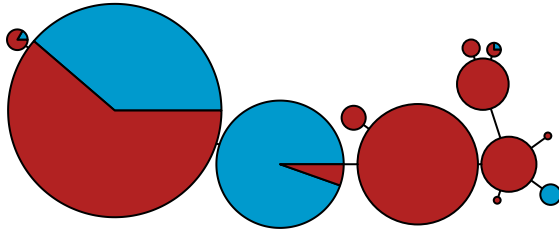





Figure S217. MBPA\_000011187 Rhodophyta

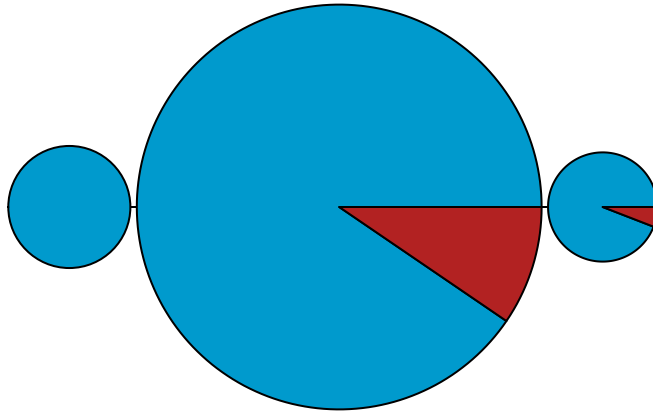

Figure S218. MBPA\_000011342 Stramenopiles

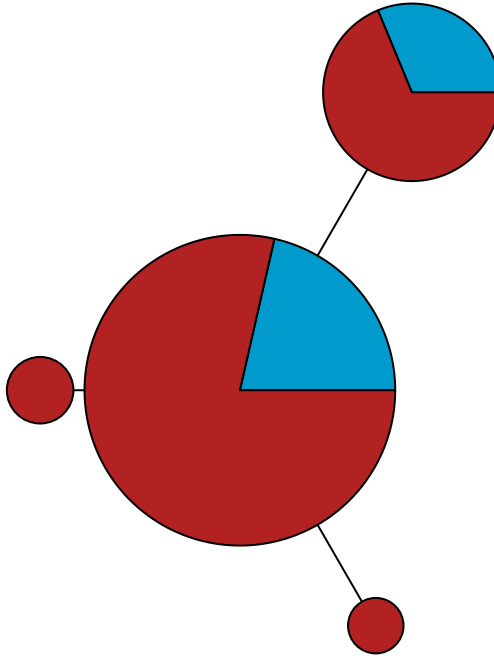

Figure S219. MBPA\_000011408 Rhodophyta

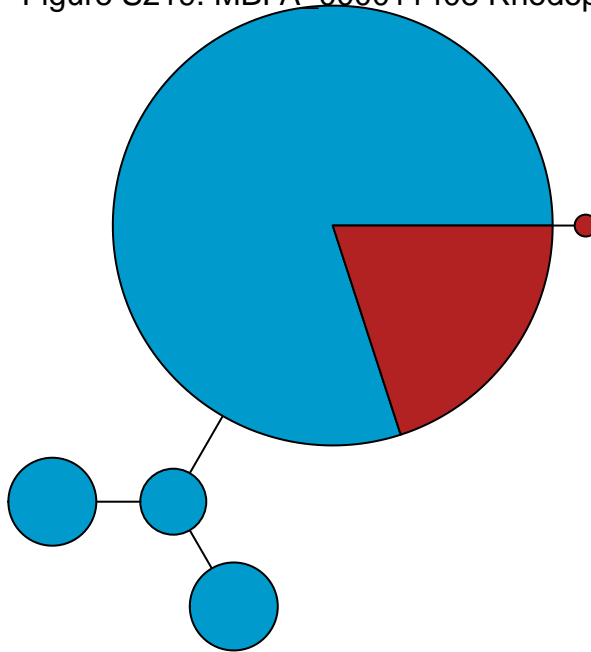

Figure S220. MBPA\_000011511 Stramenopiles

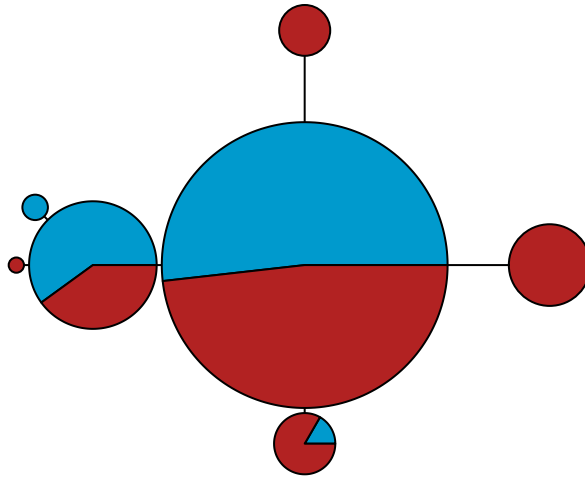

Figure S221. MBPA\_000011533 Metazoa

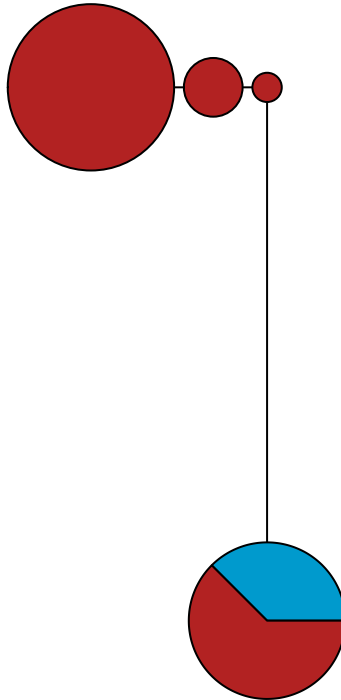

Figure S222. MBPA\_000011558 Metazoa

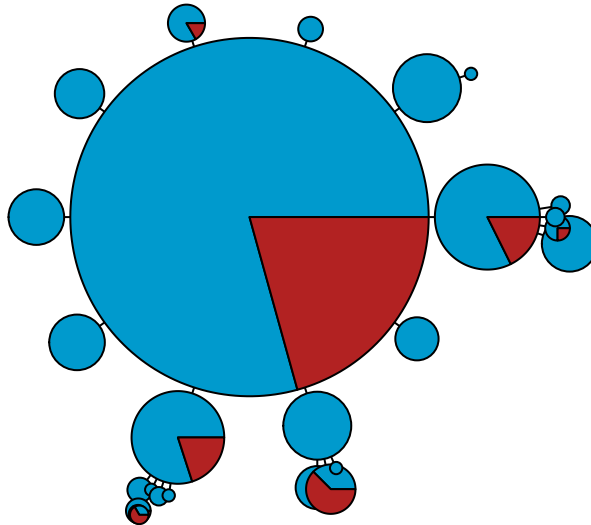

Figure S223. MBPA\_000011575 Metazoa

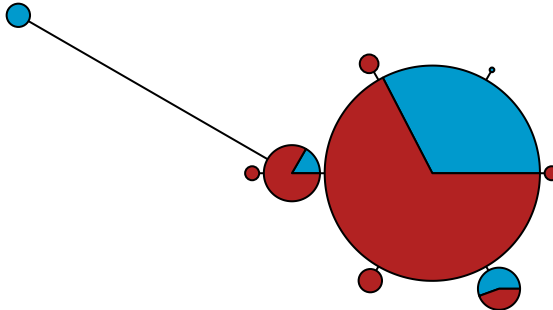



Figure S224. MBPA\_000011795

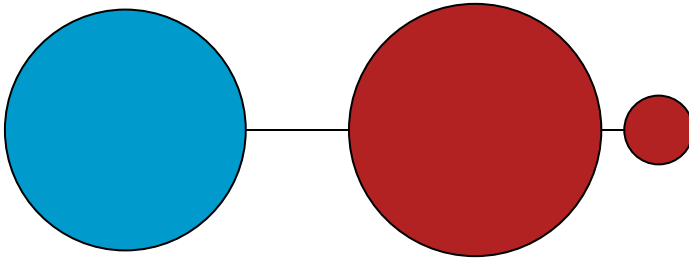

Figure S225. MBPA\_000011942 Metazoa

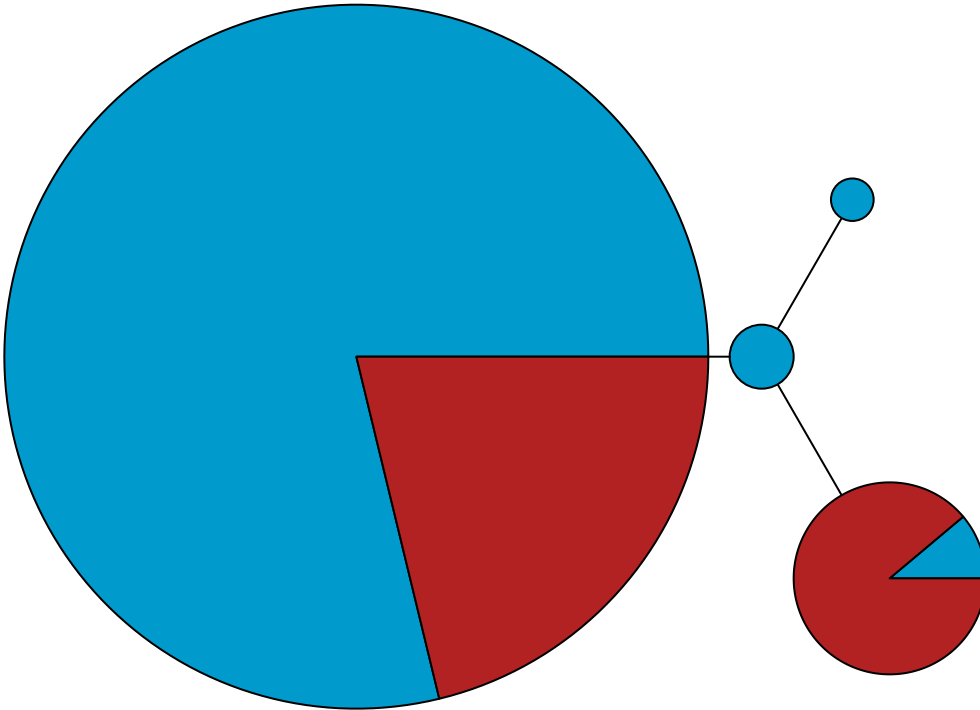

Figure S226. MBPA\_000012149 Rhodophyta

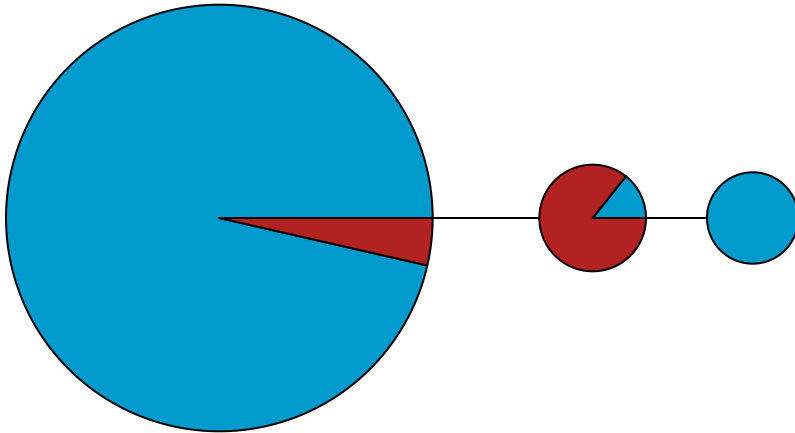

Figure S227. MBPA\_000012398 Rhodophyta

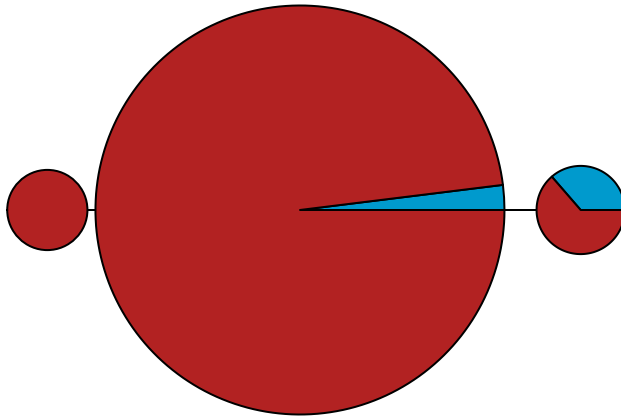

Figure S228. MBPA\_000013383 Rhodophyta

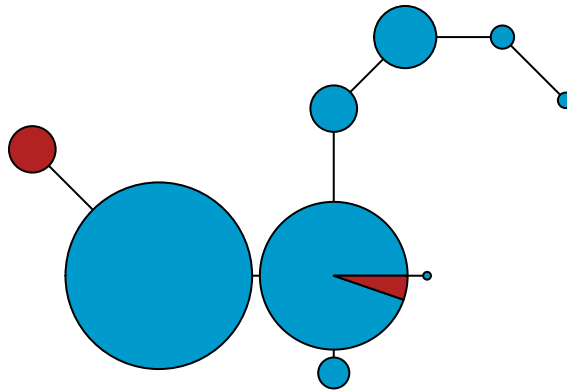

Figure S229. MBPA\_000013488 Metazoa

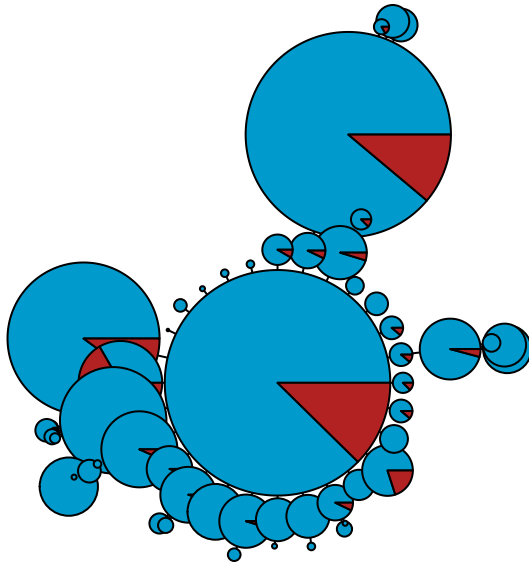

Figure S230. MBPA\_000013614 Stramenopiles

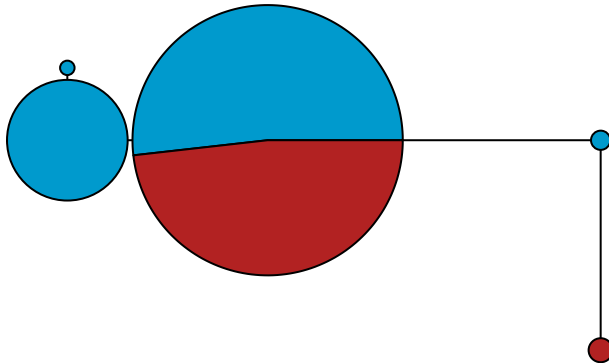

Figure S231. MBPA\_000013638 Rhodophyta

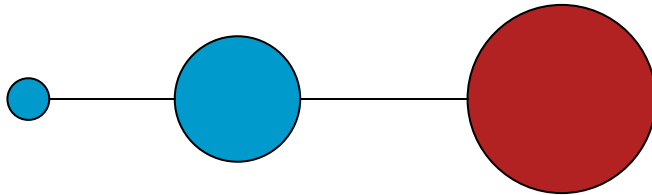



Figure S232. MBPA\_000013680 Metazoa

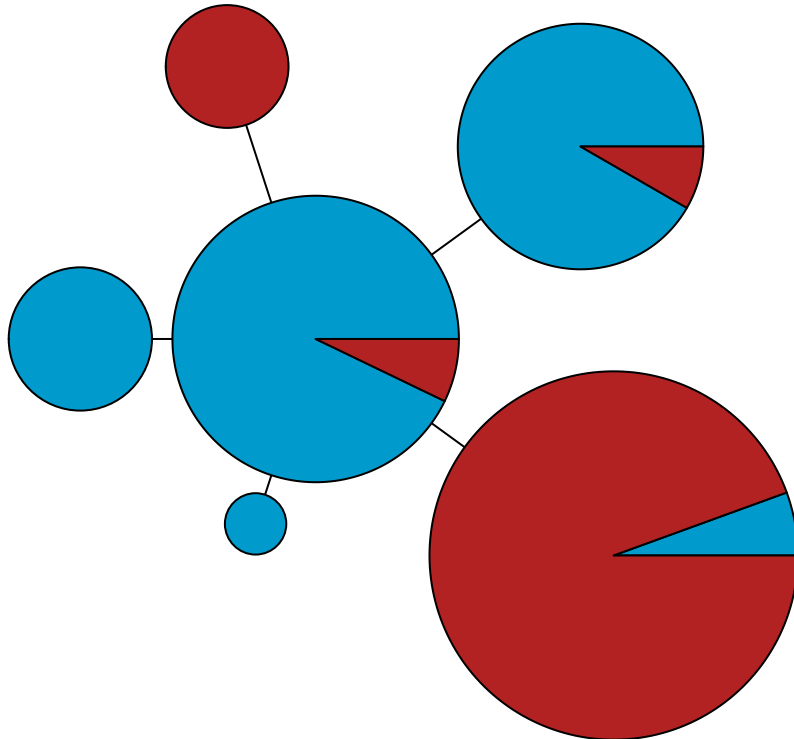

Figure S233. MBPA\_000014041 Rhodophyta

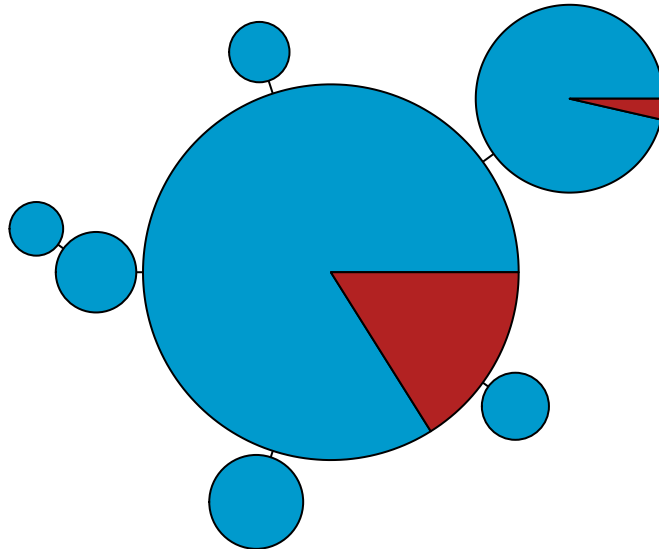

Figure S234. MBPA\_000014171 Metazoa

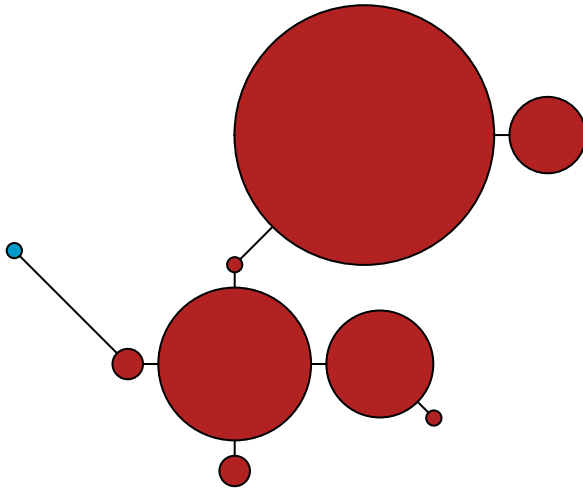

Figure S235. MBPA\_000014317 Rhodophyta

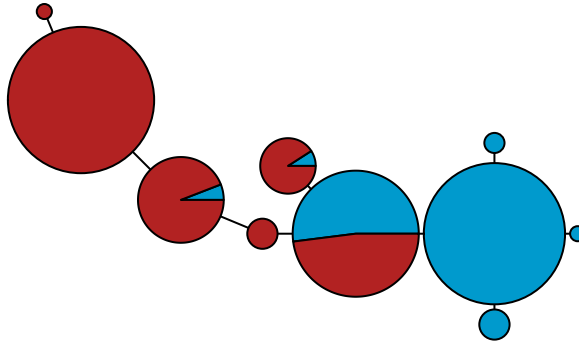

Figure S236. MBPA\_000014353 Metazoa

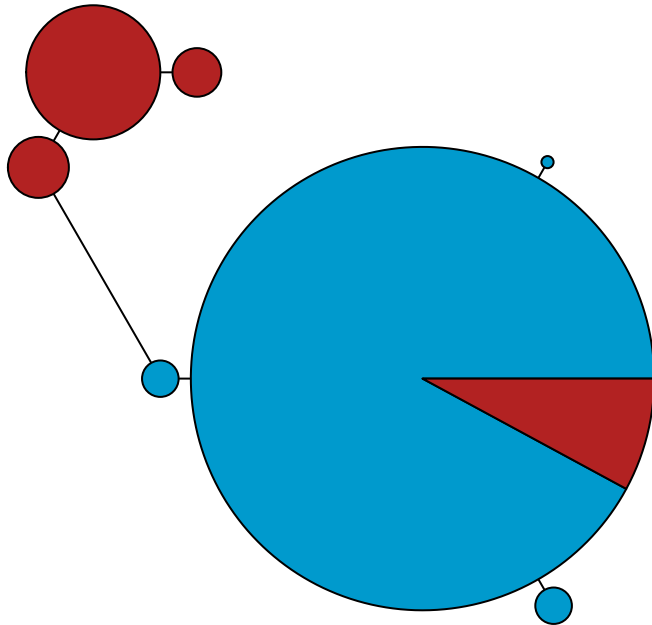

Figure S237. MBPA\_000014365 Metazoa

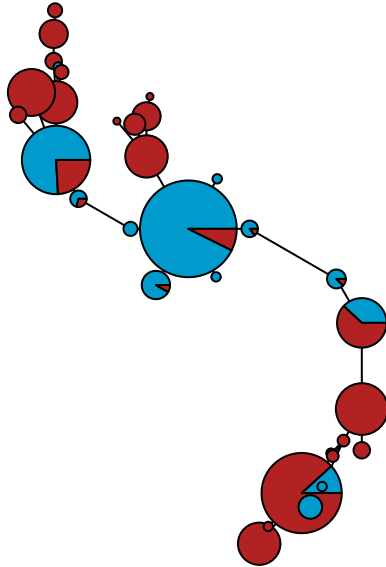

Figure S238. MBPA\_000014569

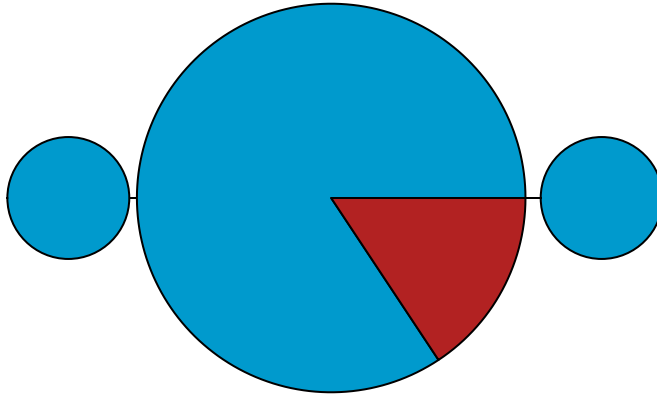

Figure S239. MBPA\_000014641

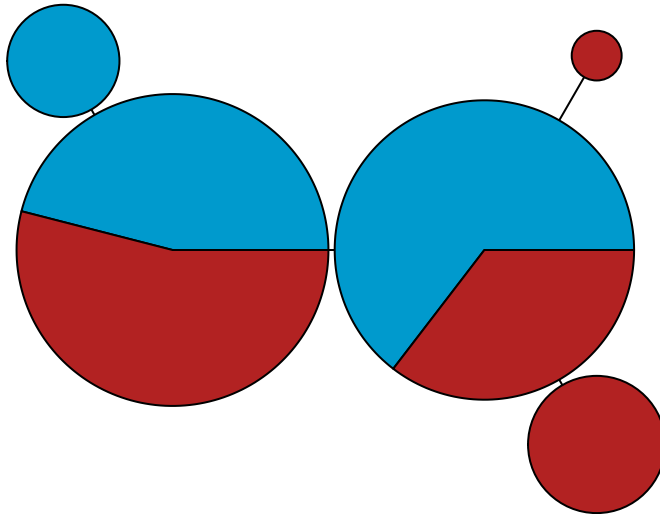



Figure S240. MBPA\_000015316

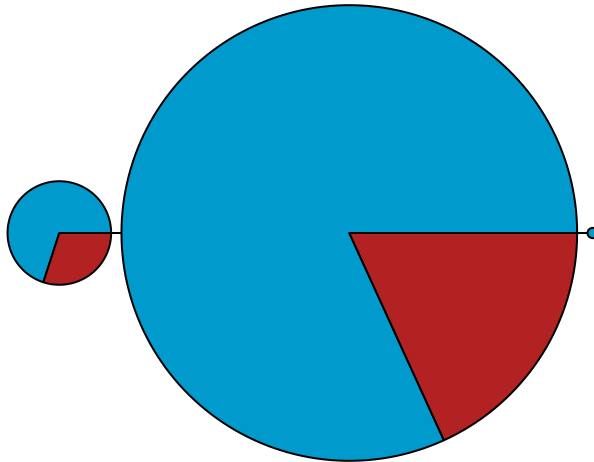

Figure S241. MBPA\_000015396 Metazoa

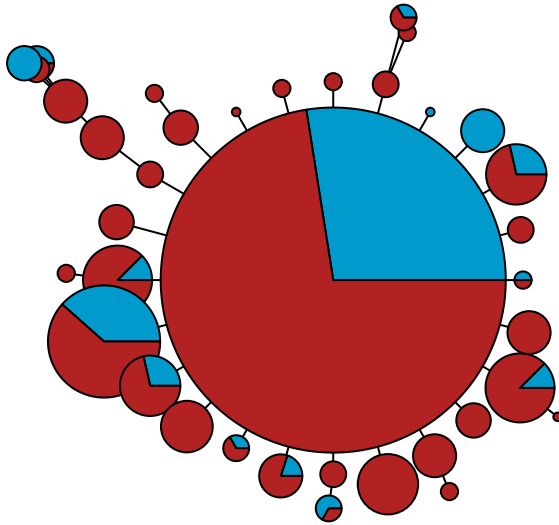

Figure S242. MBPA\_000015741 Metazoa

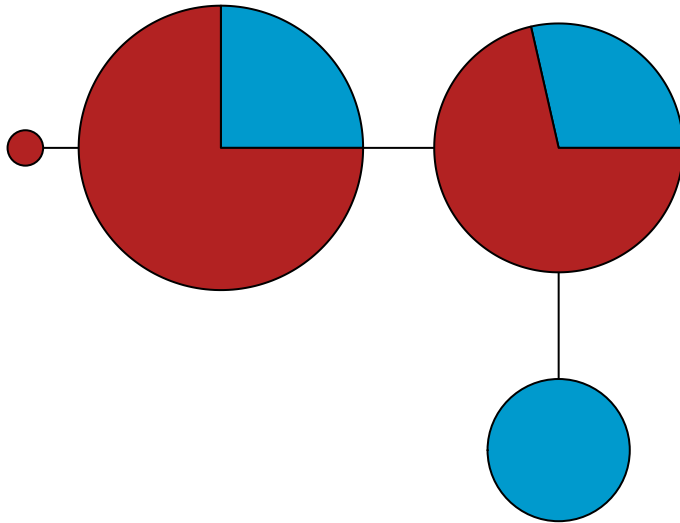

Figure S243. MBPA\_000015751 Metazoa

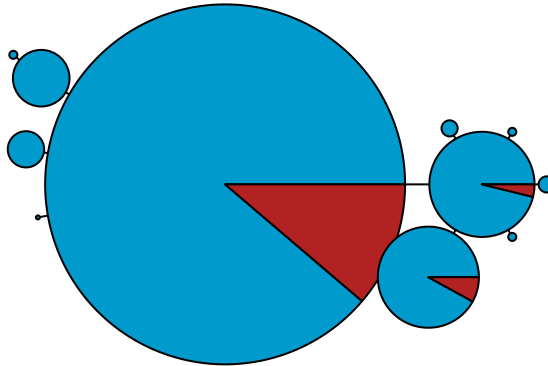

Figure S244. MBPA\_000015964 Rhodophyta

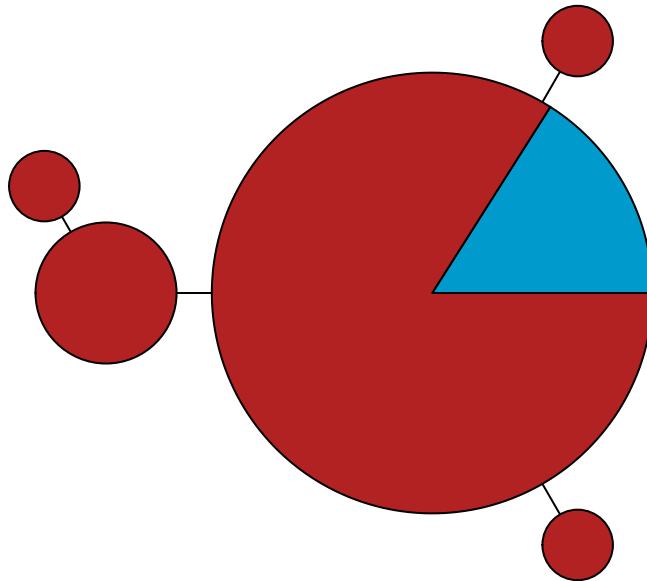

Figure S245. MBPA\_000016543 Rhodophyta

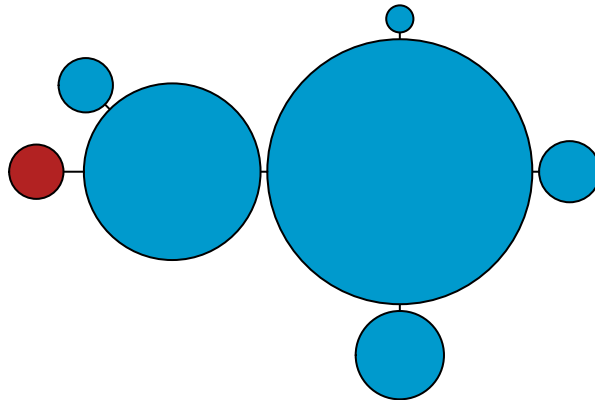

Figure S246. MBPA\_000017127 Metazoa

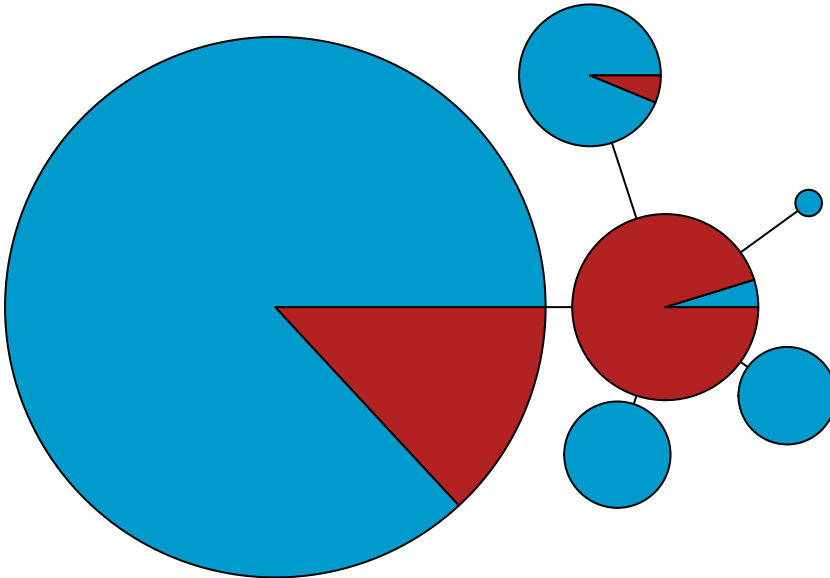

Figure S247. MBPA\_000017339 Rhodophyta

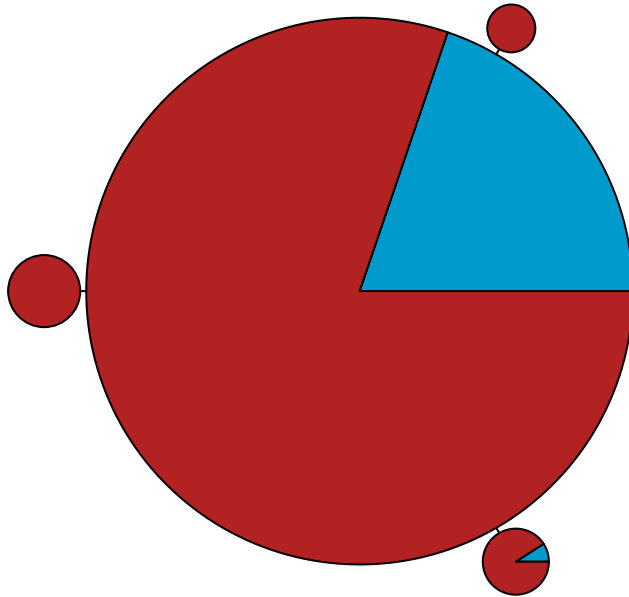



Figure S248. MBPA\_000017880

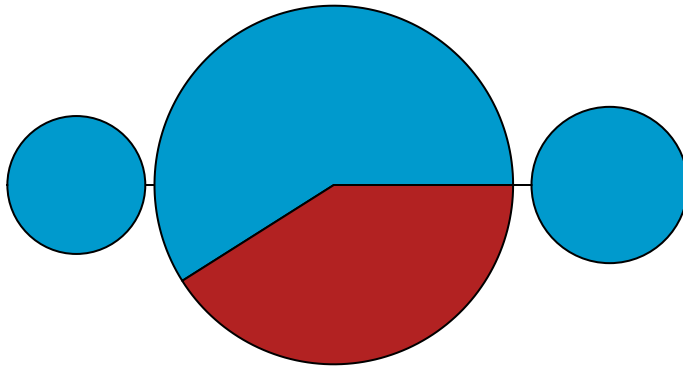

Figure S249. MBPA\_000018047 Metazoa

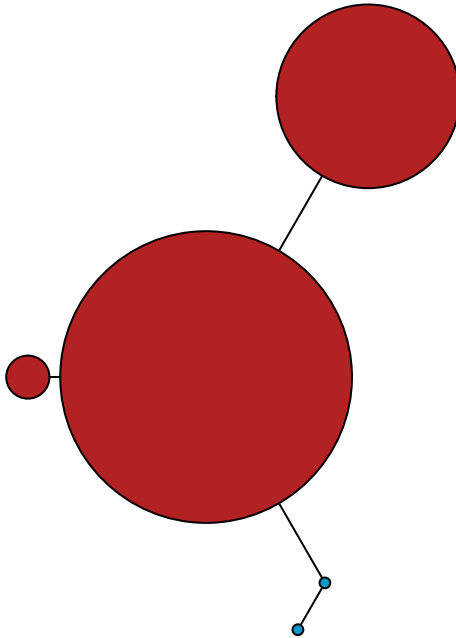

Figure S250. MBPA\_000018125 Metazoa

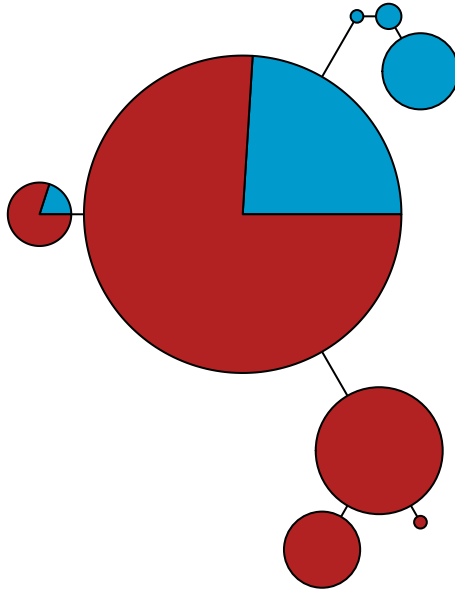



Figure S252. MBPA\_000019194 Metazoa

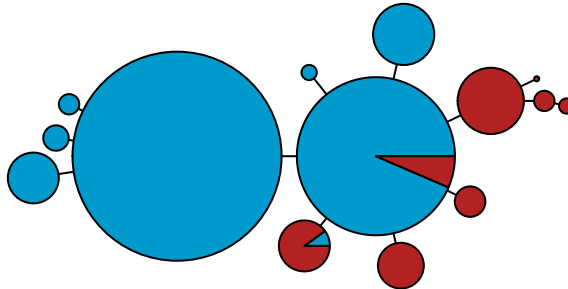

Figure S253. MBPA\_000019499 Stramenopiles

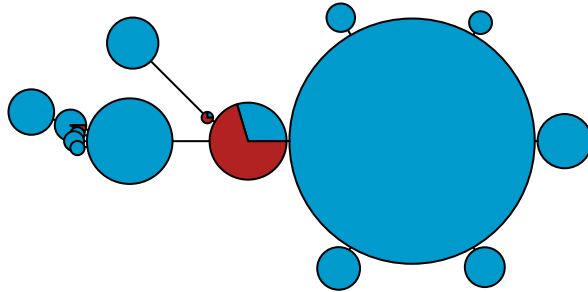

Figure S254. MBPA\_000019575 Stramenopiles

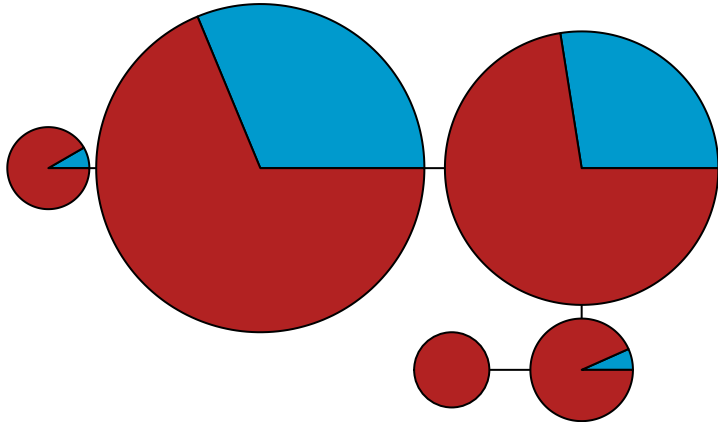

Figure S255. MBPA\_000019614 Metazoa

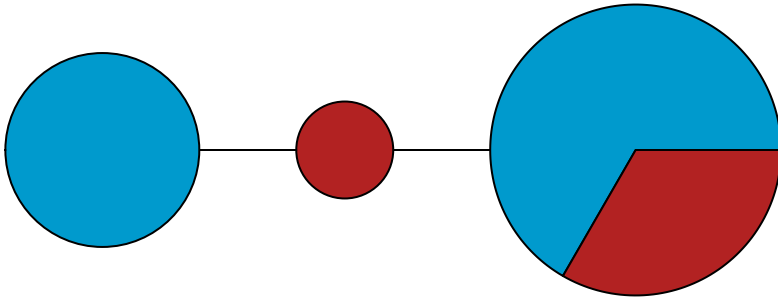



Figure S256. MBPA\_000019805 Metazoa

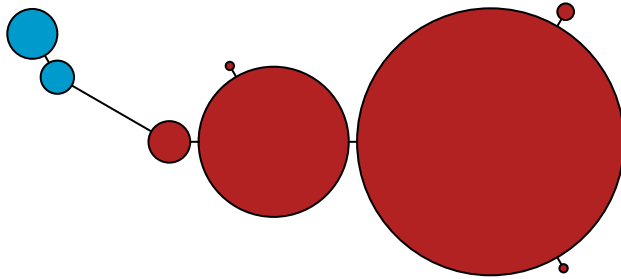

Figure S257. MBPA\_000019843 Rhodophyta

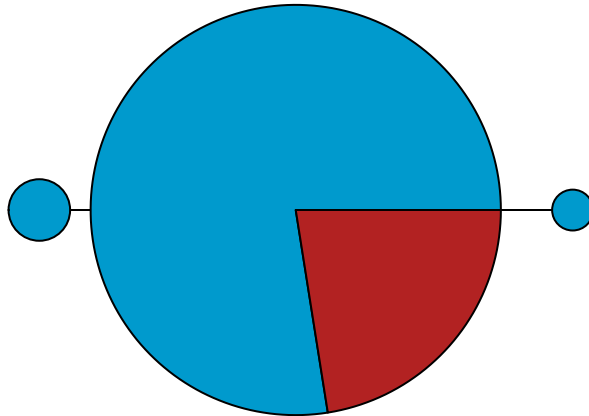

Figure S258. MBPA\_000019963 Metazoa

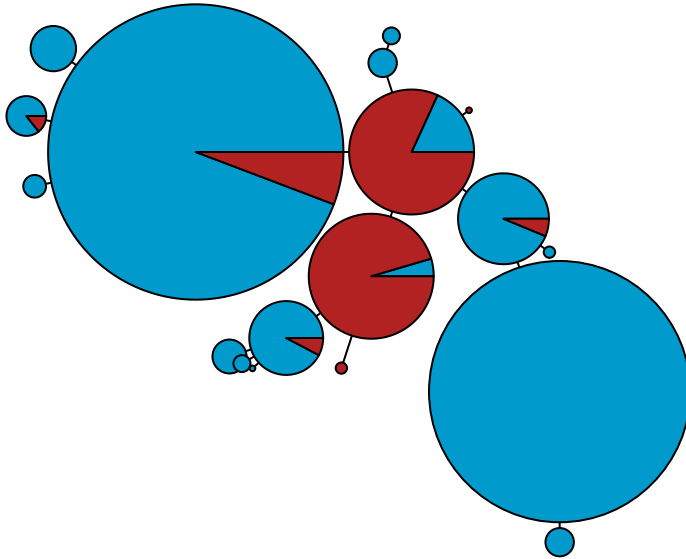

Figure S259. MBPA\_000020026 Stramenopiles

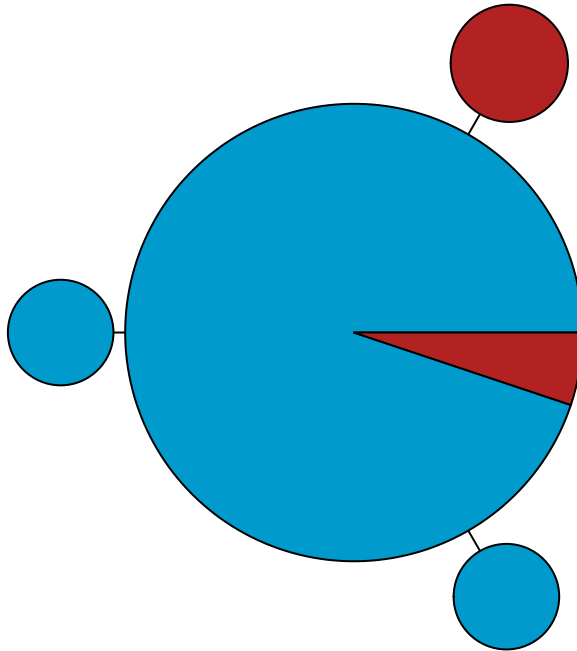

Figure S260. MBPA\_000020370

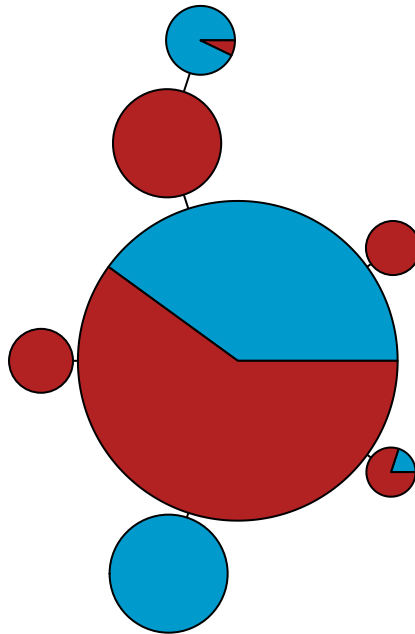

Figure S261. MBPA\_000020384 Stramenopiles

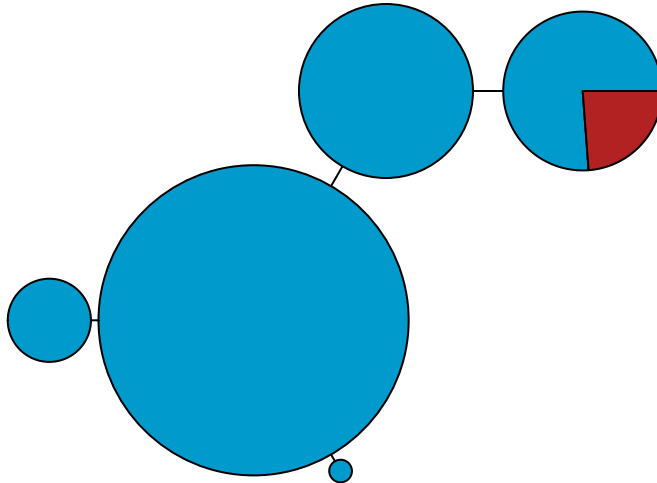

Figure S262. MBPA\_000020965 Stramenopiles

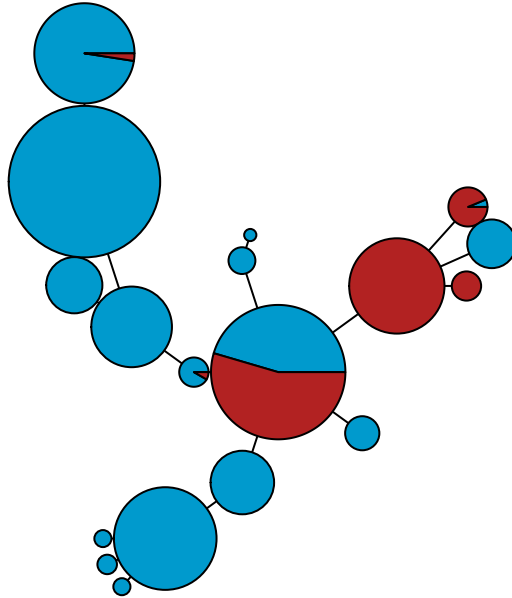

Figure S263. MBPA\_000021047 Metazoa

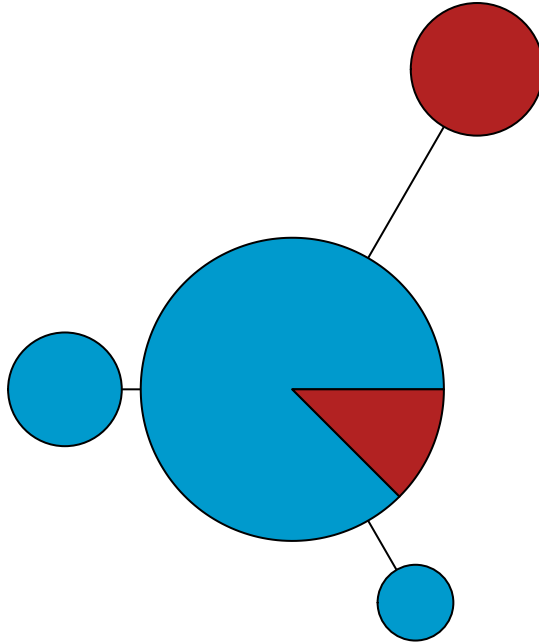



Figure S264. MBPA\_000021173 Metazoa

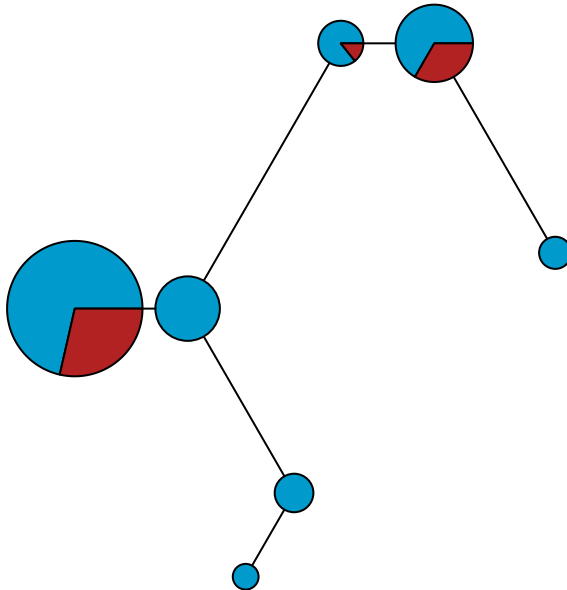

Figure S265. MBPA\_000021660 Metazoa

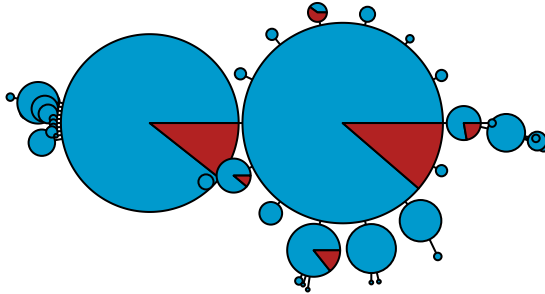

Figure S266. MBPA\_000022983 Rhodophyta

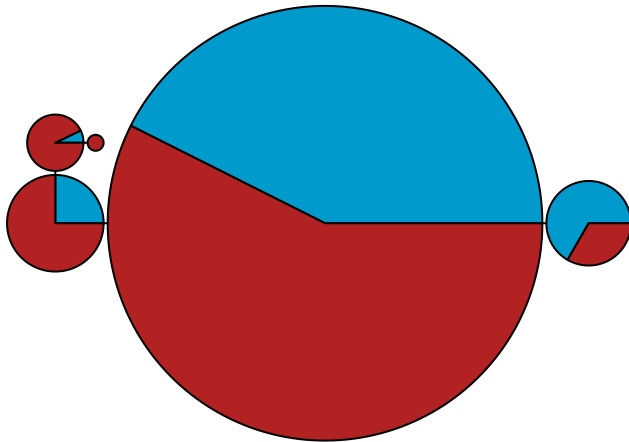

Figure S267. MBPA\_000023160 Metazoa

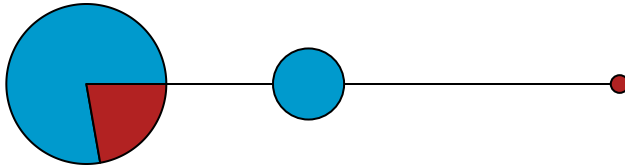

Figure S268. MBPA\_000023304 Stramenopiles

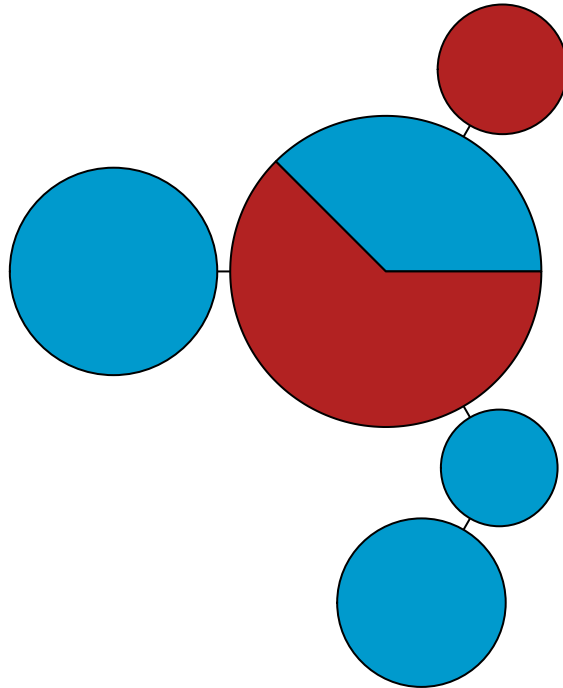

Figure S269. MBPA\_000023526 Metazoa

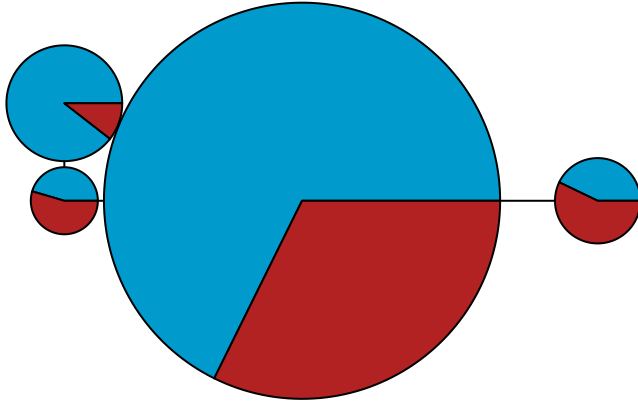

Figure S270. MBPA\_000023558 Metazoa

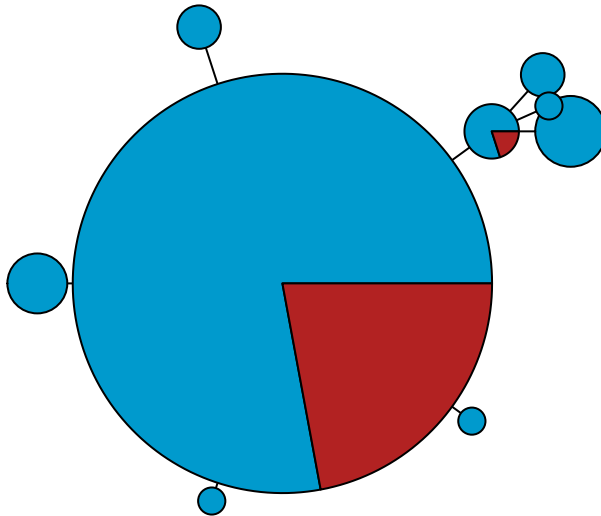

Figure S271. MBPA\_000023808 Rhodophyta

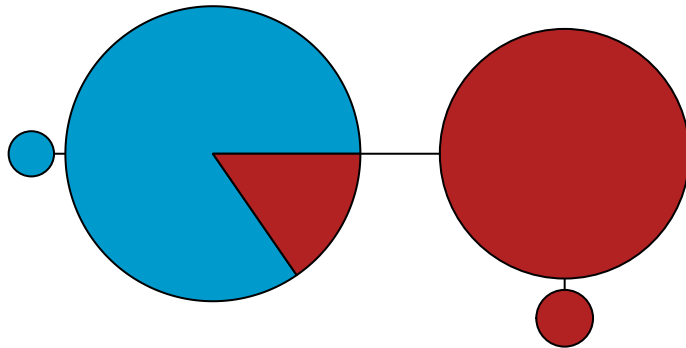



Figure S272. MBPA\_000024011 Metazoa

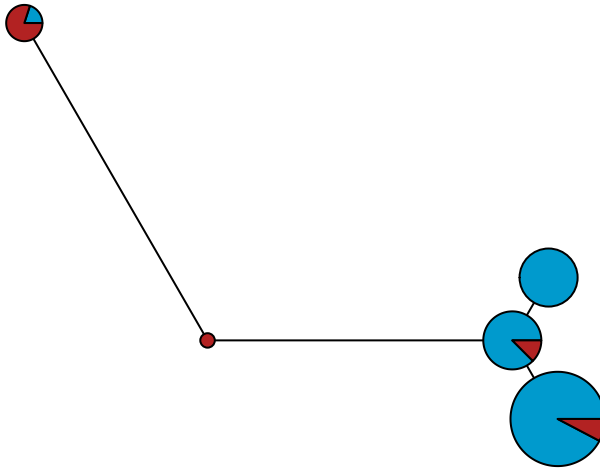

Figure S273. MBPA\_000024329 Lobosa

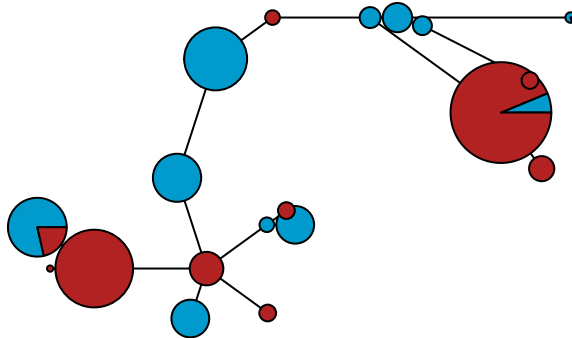

Figure S274. MBPA\_000024401 Metazoa

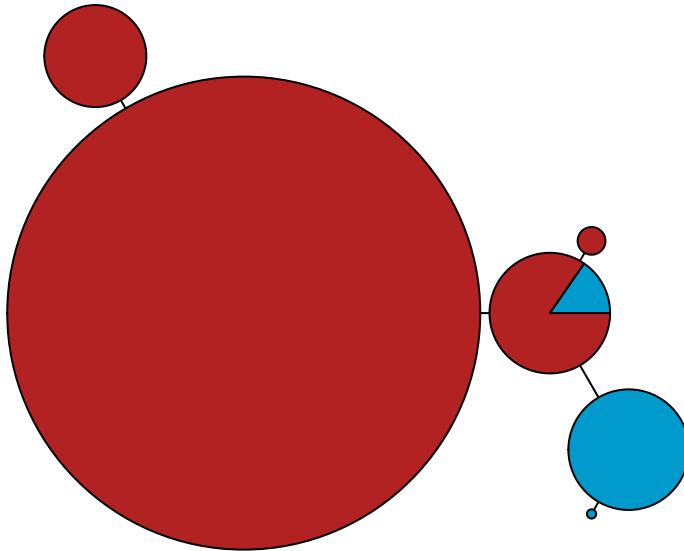

Figure S275. MBPA\_000024738 Stramenopiles

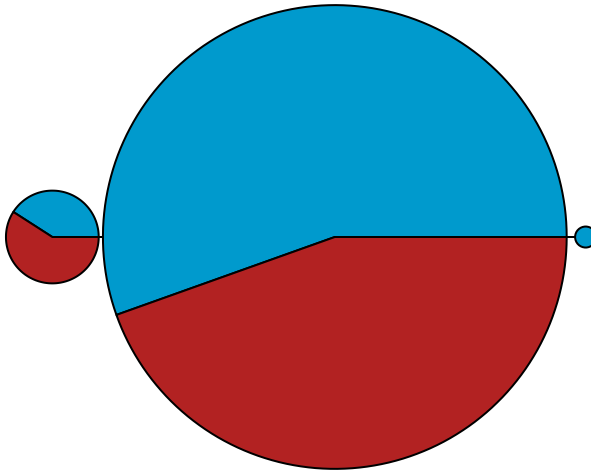

Figure S276. MBPA\_000025120 Metazoa

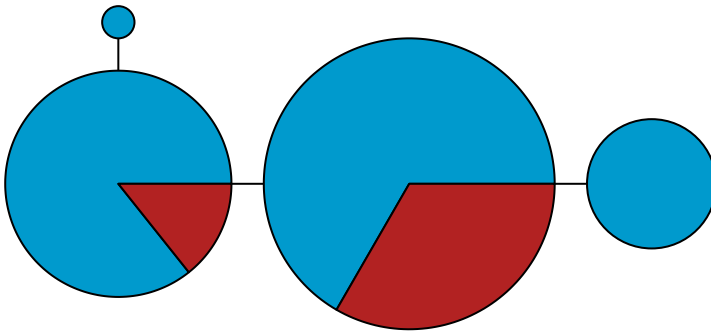

Figure S277. MBPA\_000025150 Metazoa

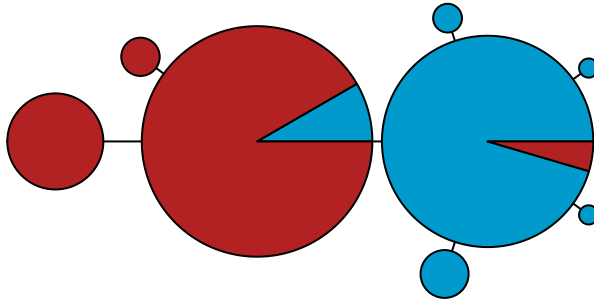

Figure S278. MBPA\_000025366 Metazoa

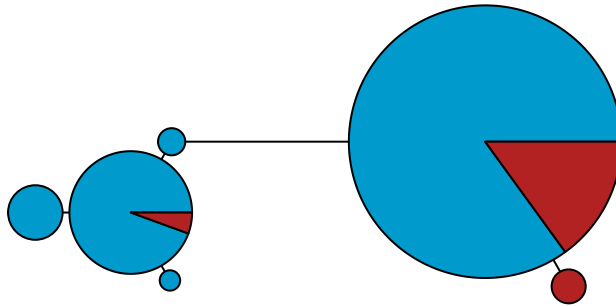

Figure S279. MBPA\_000026133

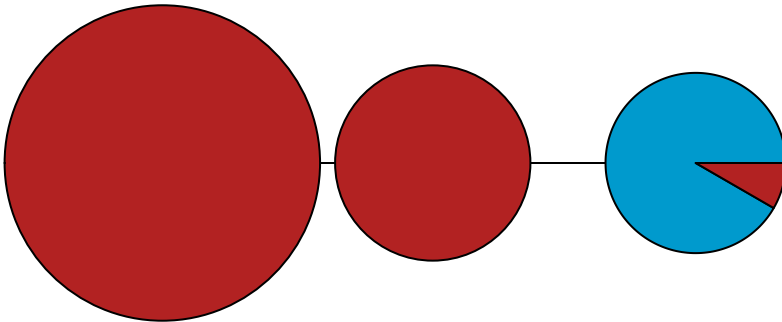



Figure S280. MBPA\_000026711

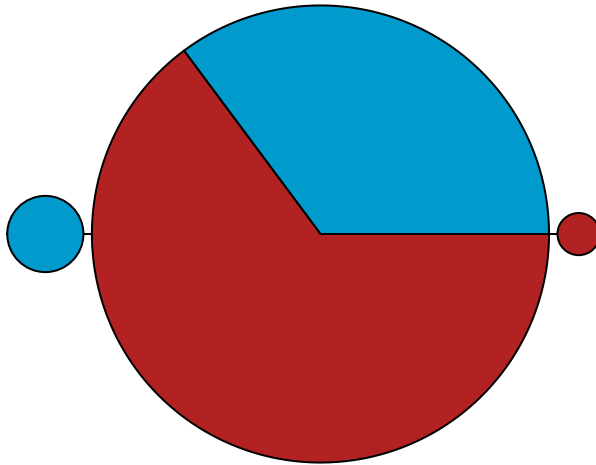



Figure S282. MBPA\_000027799 Stramenopiles

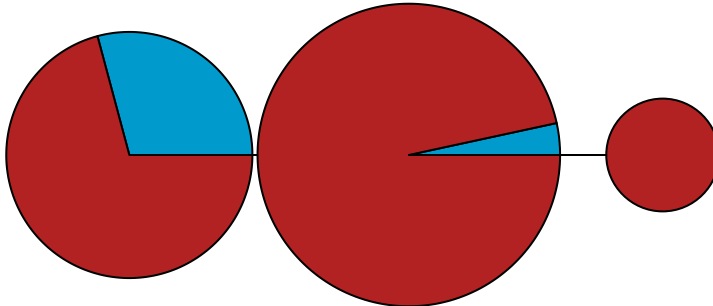

Figure S283. MBPA\_000028231 Stramenopiles

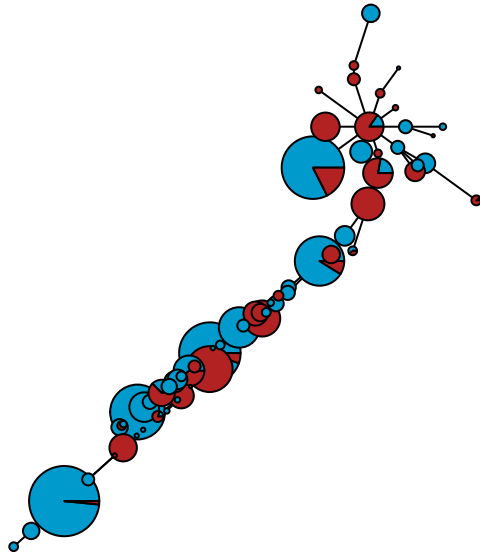

Figure S284. MBPA\_000028274 Metazoa

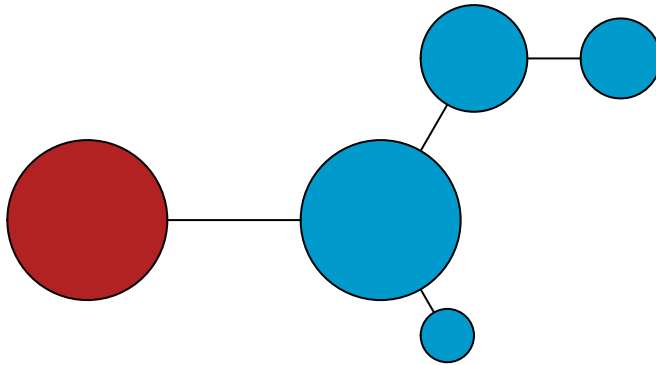

Figure S285. MBPA\_000028539 Metazoa

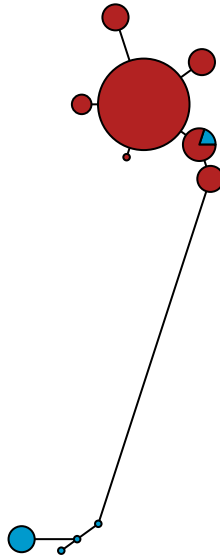

Figure S286. MBPA\_000029048 Metazoa

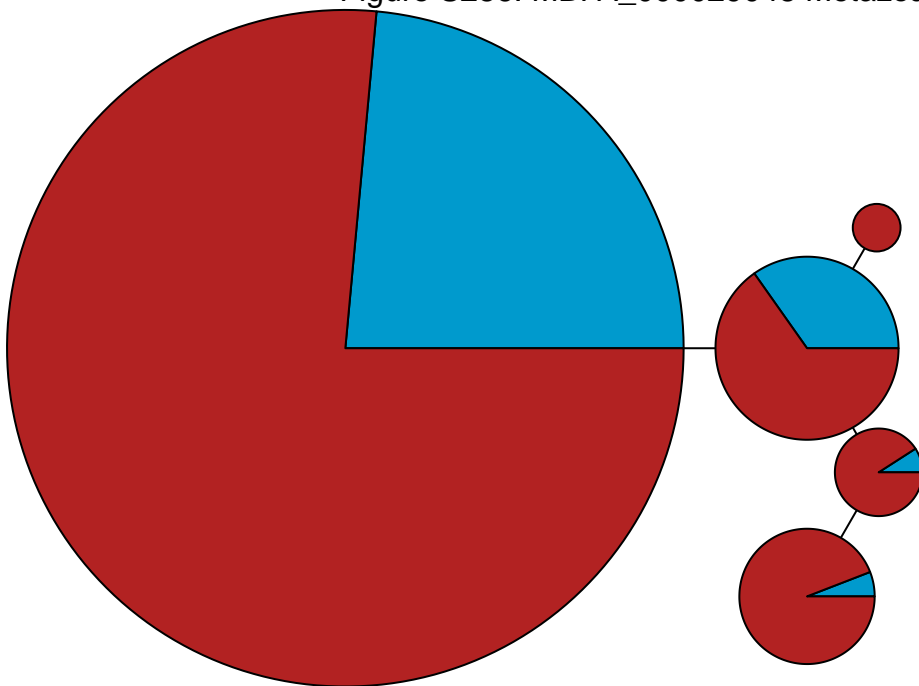

Figure S287. MBPA\_000029195 Stramenopiles

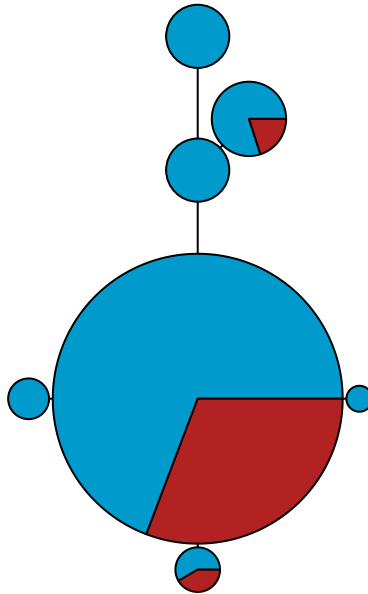



Figure S288. MBPA\_000029552 Metazoa

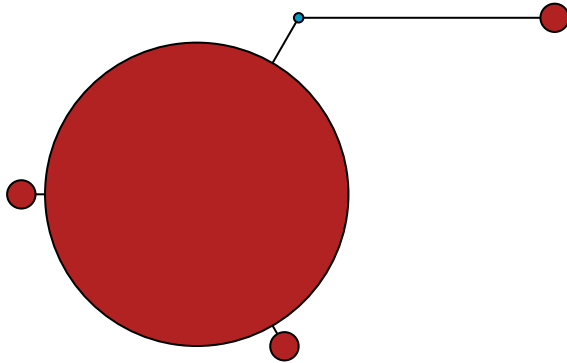

Figure S289. MBPA\_000031064

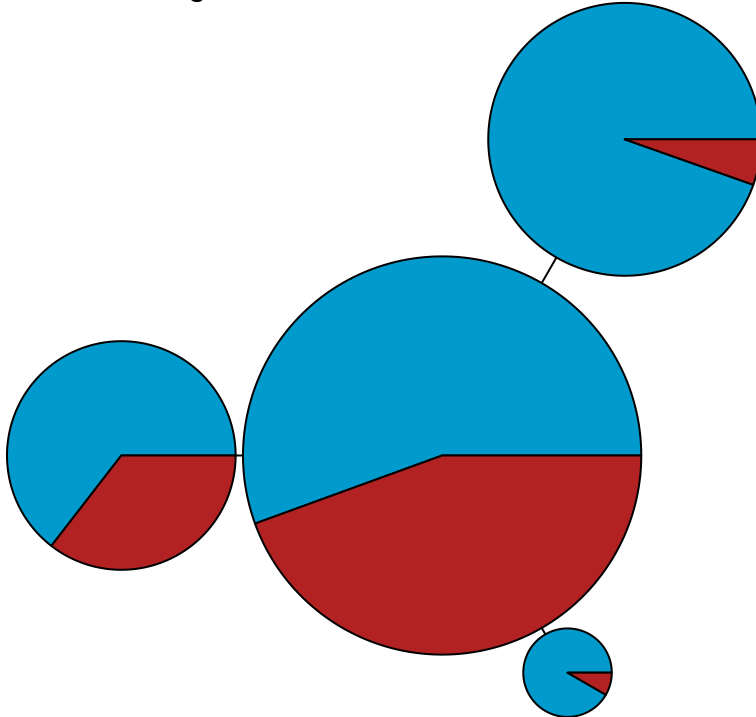

Figure S290. MBPA\_000031322 Stramenopiles

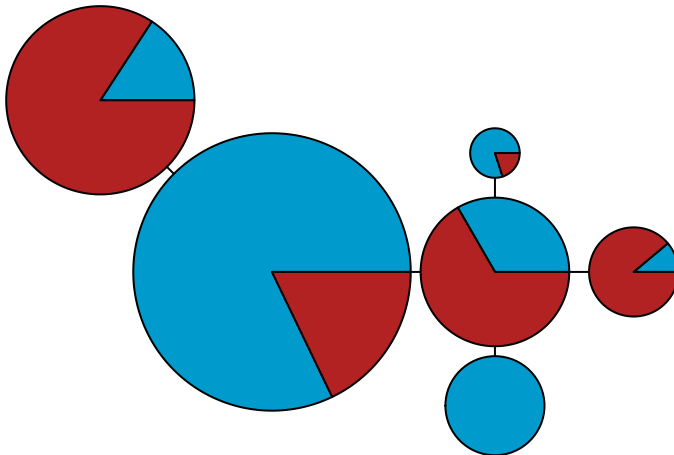

Figure S291. MBPA\_000031574 Stramenopiles

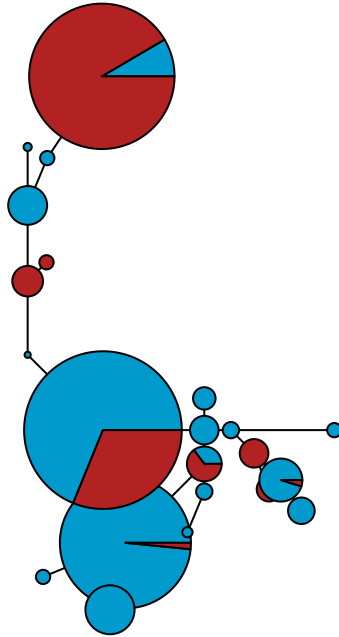

Figure S292. MBPA\_000032954 Stramenopiles

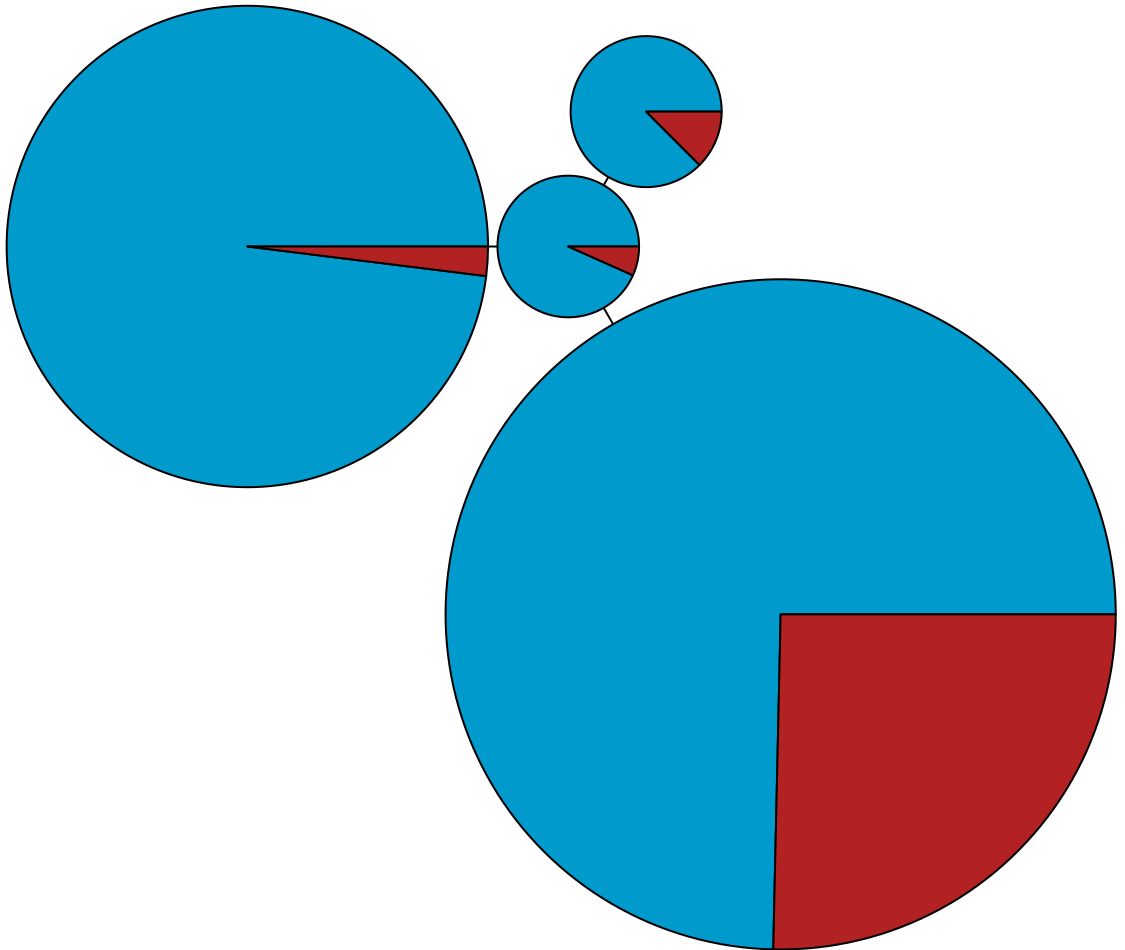

Figure S293. MBPA\_000033226 Metazoa

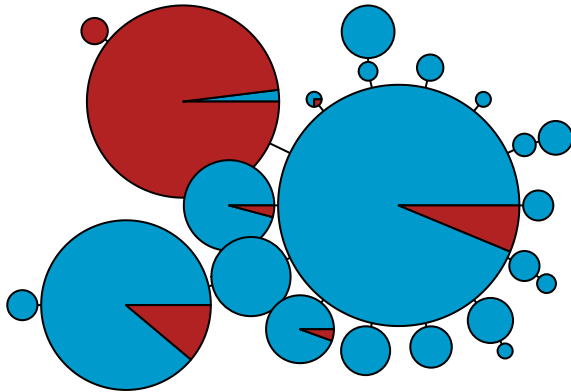

Figure S294. MBPA\_000033962 Apusozoa

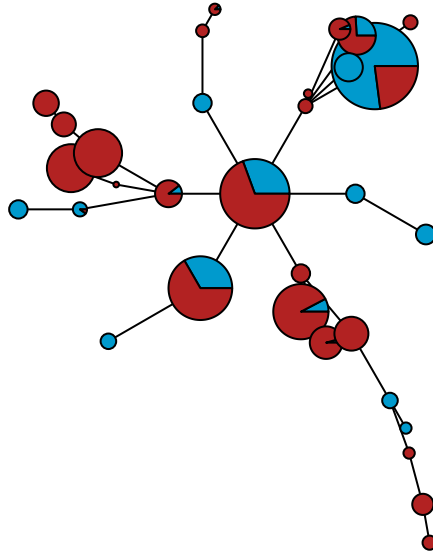

Figure S295. MBPA\_000035627 Metazoa

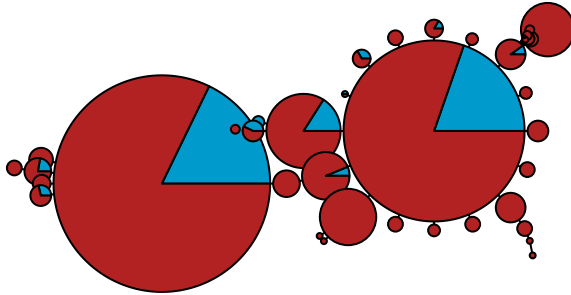



Figure S296. MBPA\_000036272 Metazoa

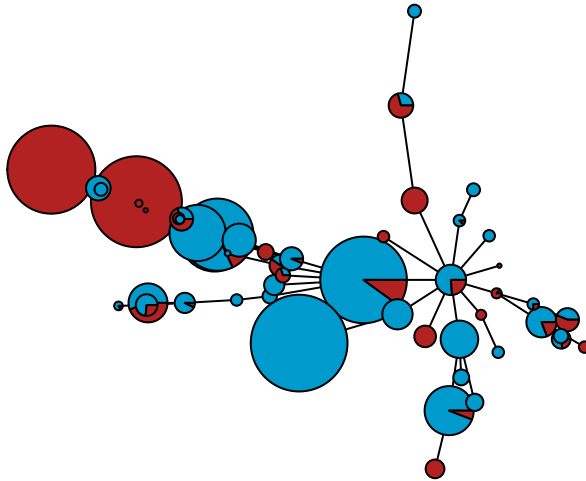



Figure S298. MBPA\_000036793

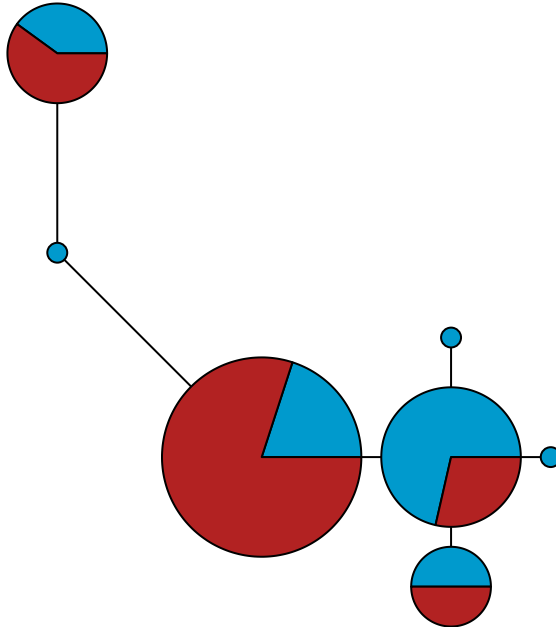

Figure S299. MBPA\_000037107 Rhodophyta

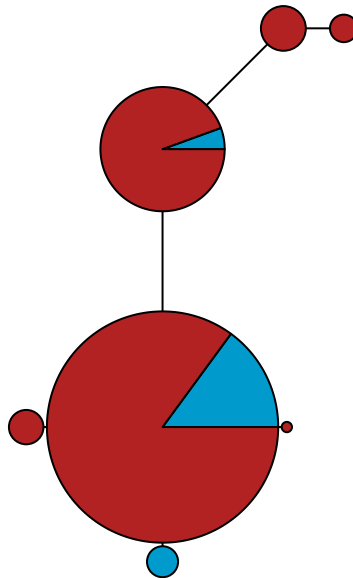

Figure S300. MBPA\_000037644 Metazoa

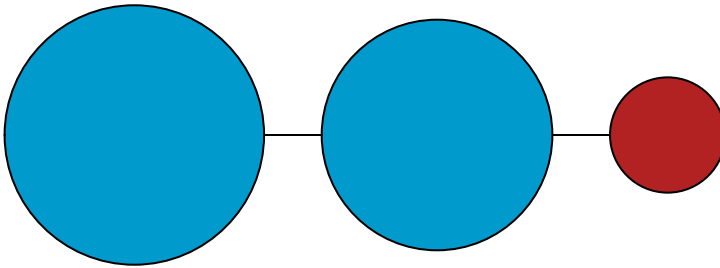

Figure S301. MBPA\_000037724 Metazoa

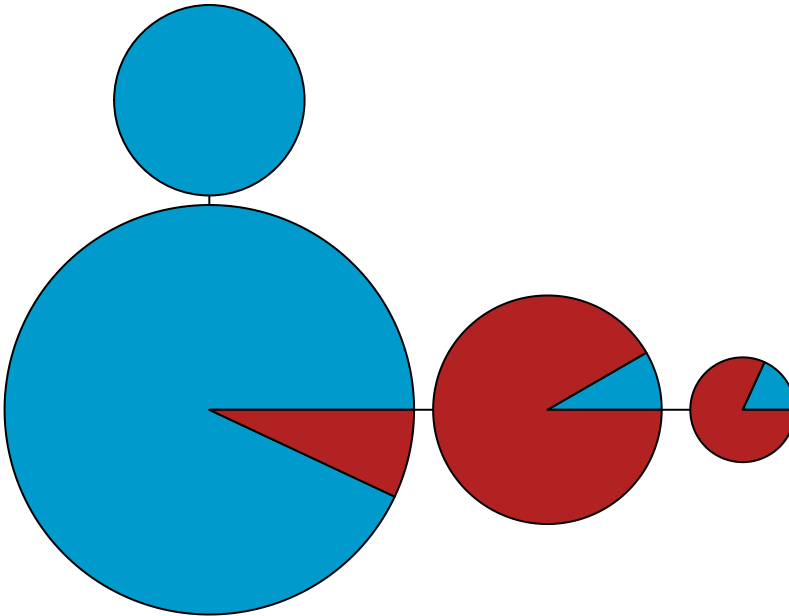

Figure S302. MBPA\_000037738 Rhodophyta

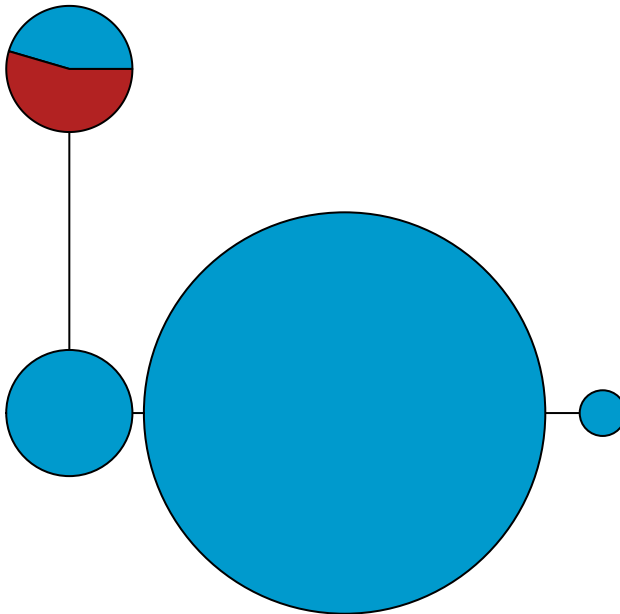

Figure S303. MBPA\_000040545 Metazoa

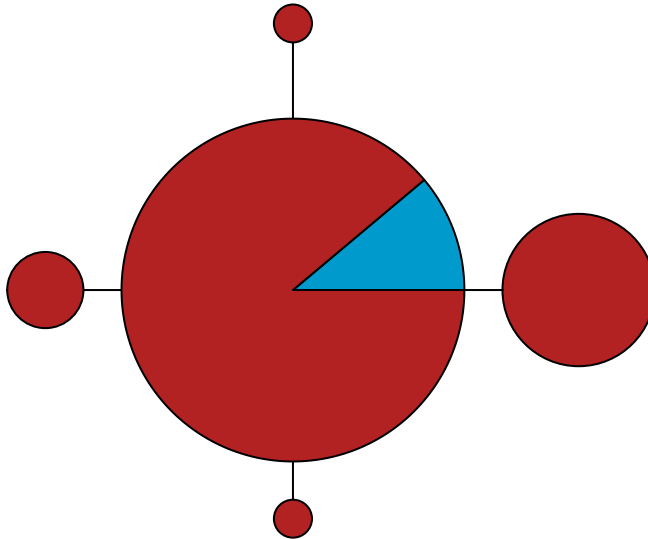



Figure S304. MBPA\_000042387

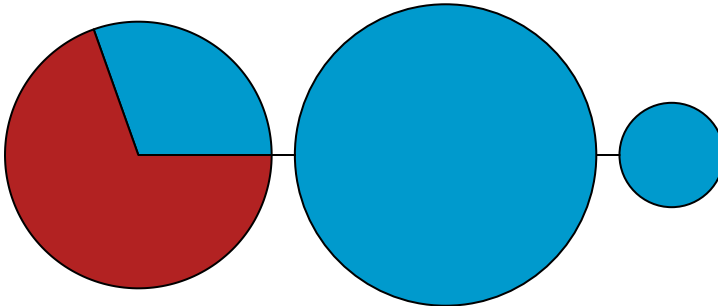

Figure S305. MBPA\_000042908

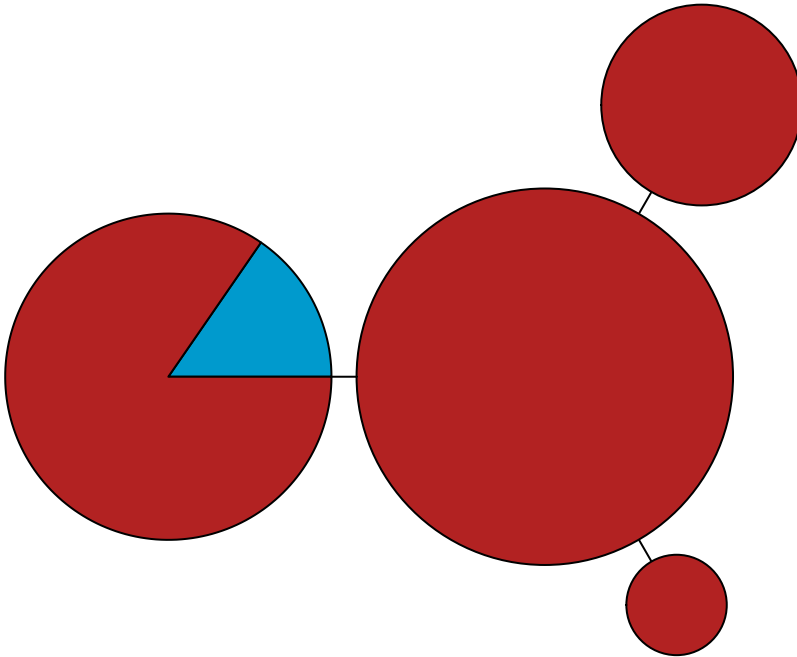

Figure S306. MBPA\_000043002 Metazoa

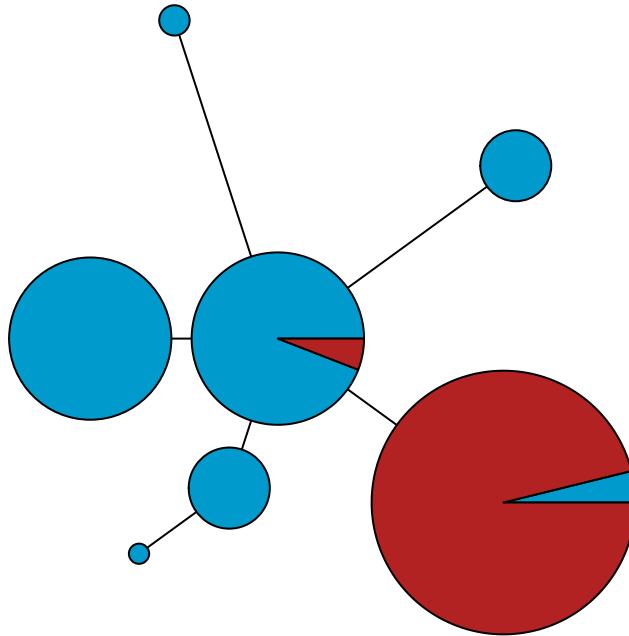

Figure S307. MBPA\_000043371

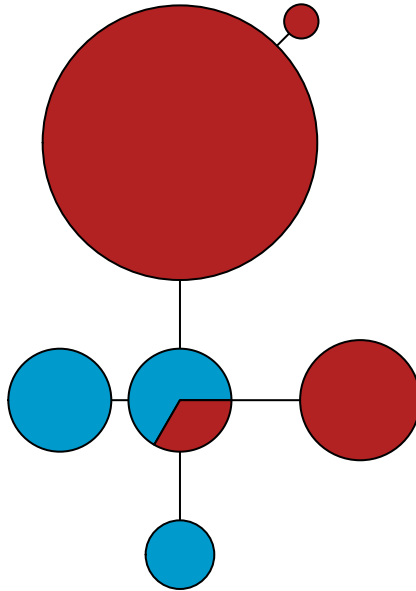

Figure S308. MBPA\_000044058 Metazoa

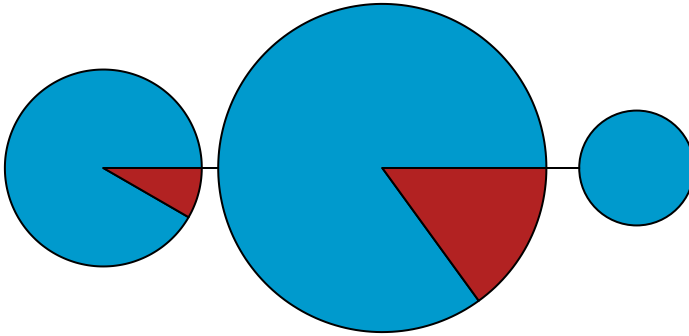

Figure S309. MBPA\_000044934 Stramenopiles

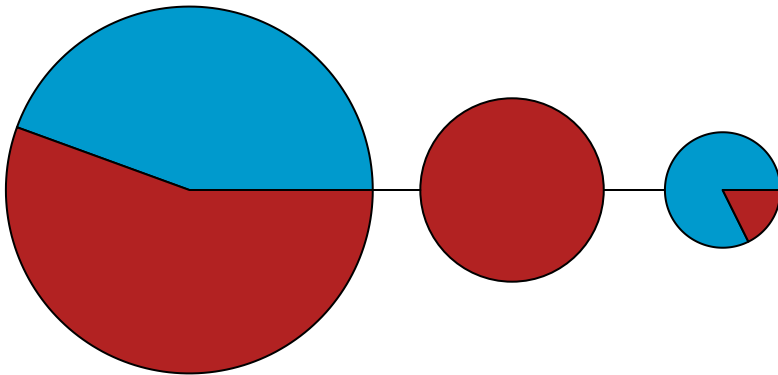

Figure S310. MBPA\_000045592

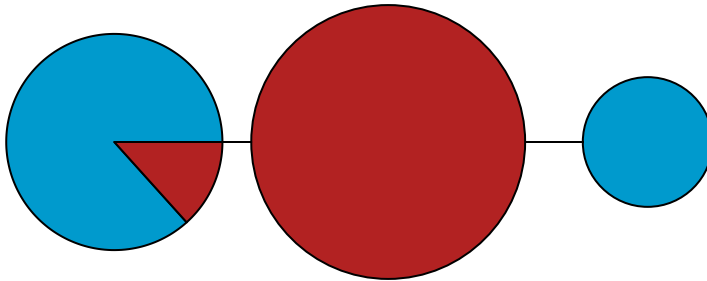

Figure S311. MBPA\_000045838 Metazoa

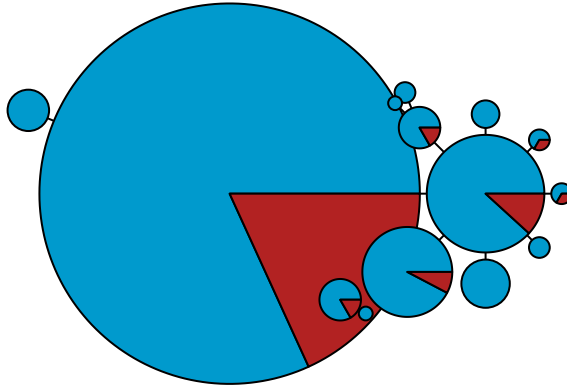



Figure S312. MBPA\_000046034 Metazoa

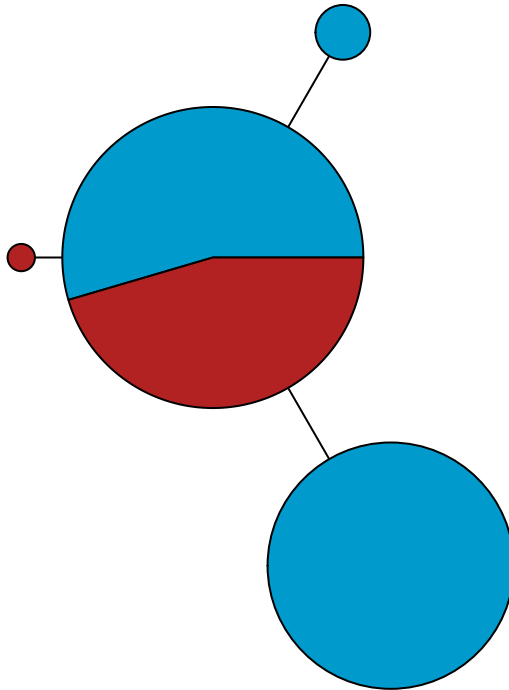

Figure S313. MBPA\_000046040 Rhodophyta

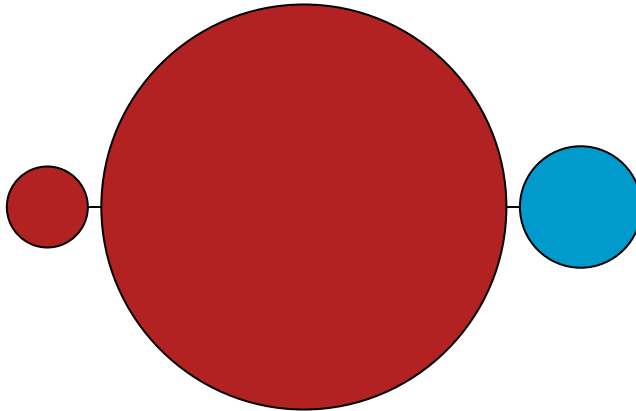

Figure S314. MBPA\_000047017 Metazoa

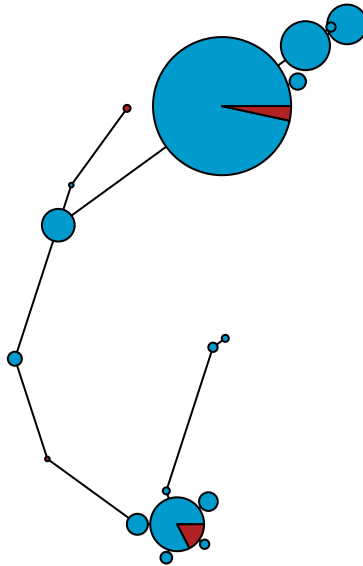

Figure S315. MBPA\_000047601 Metazoa

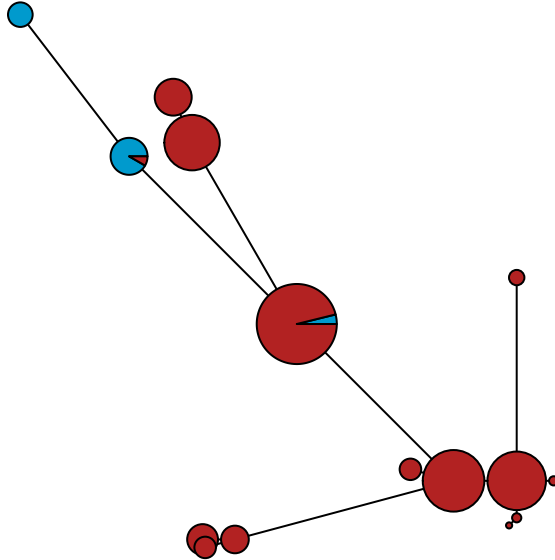

Figure S316. MBPA\_000048533 Metazoa

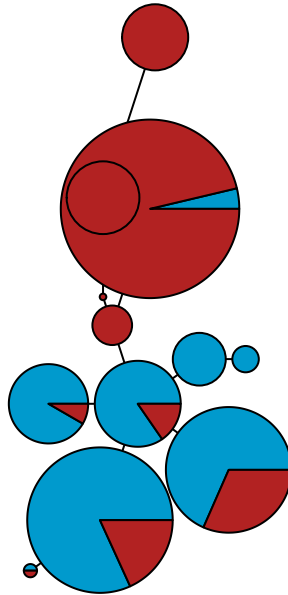

Figure S317. MBPA\_000048986 Metazoa

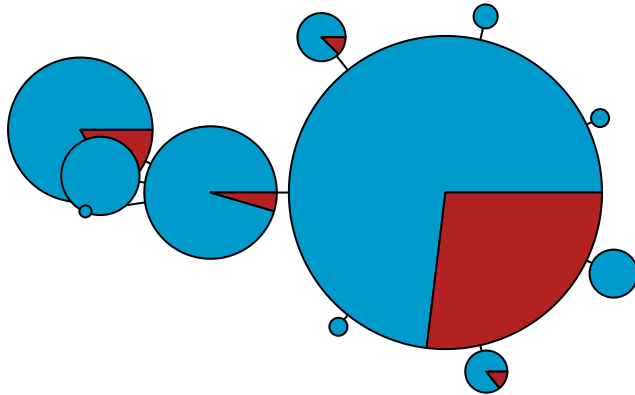

Figure S318. MBPA\_000049367 Metazoa

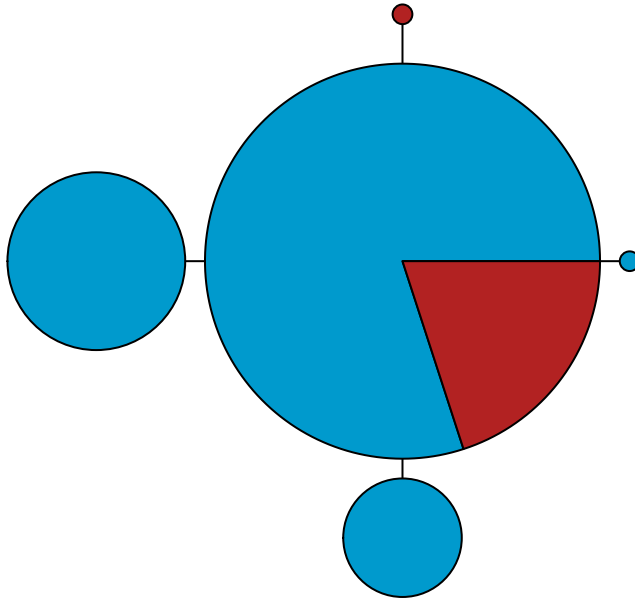

Figure S319. MBPA\_000050844 Metazoa

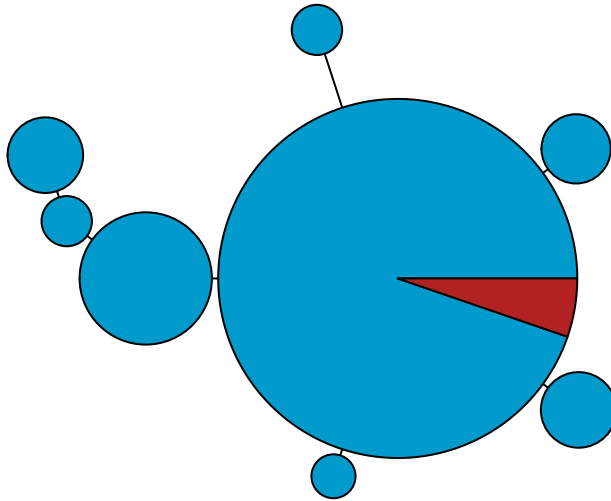



Figure S320. MBPA\_000051093 Metazoa

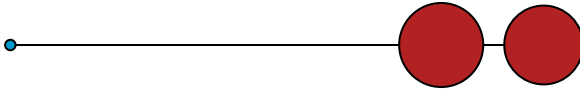

Figure S321. MBPA\_000051659 Metazoa

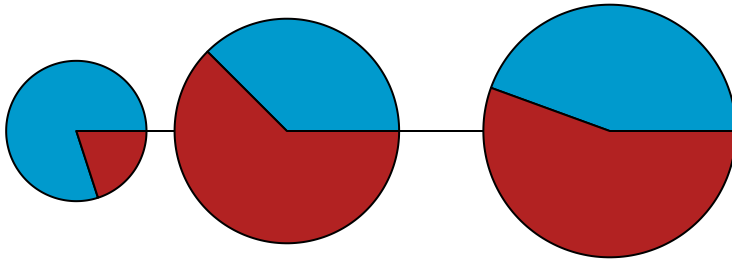

Figure S322. MBPA\_000052016 Metazoa

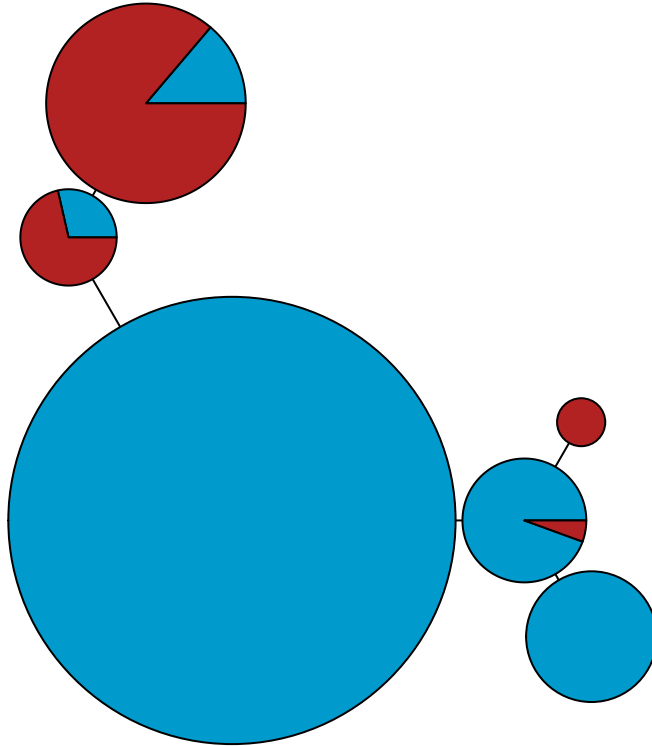

Figure S323. MBPA\_000052152 Stramenopiles

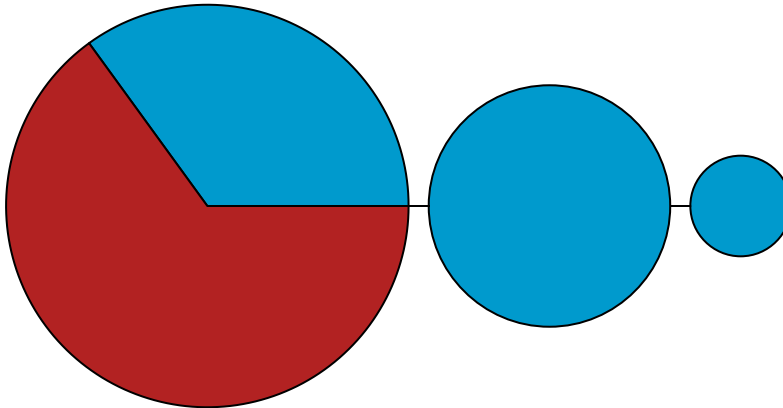

Figure S324. MBPA\_000052777 Stramenopiles

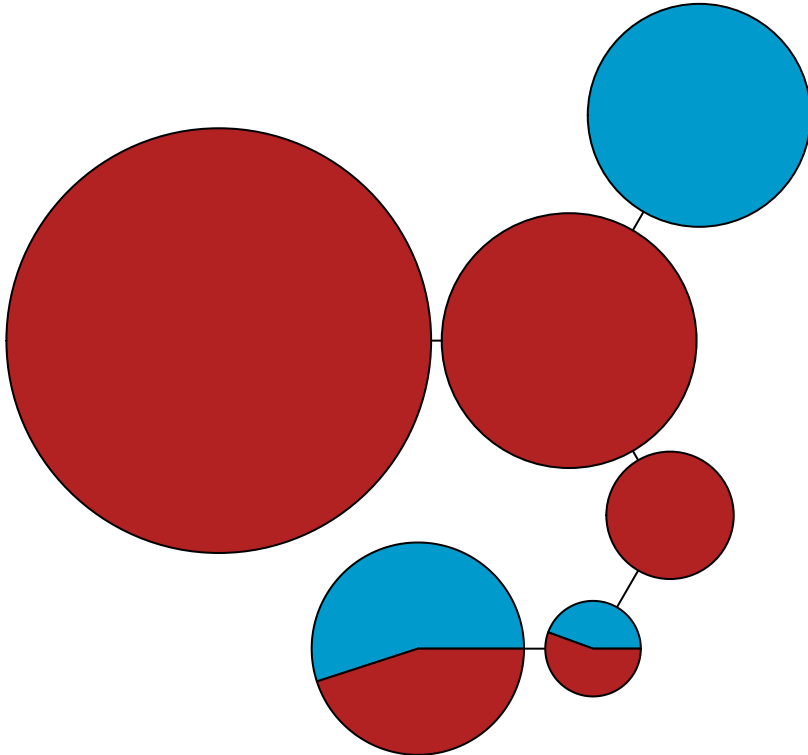

Figure S325. MBPA\_000053184

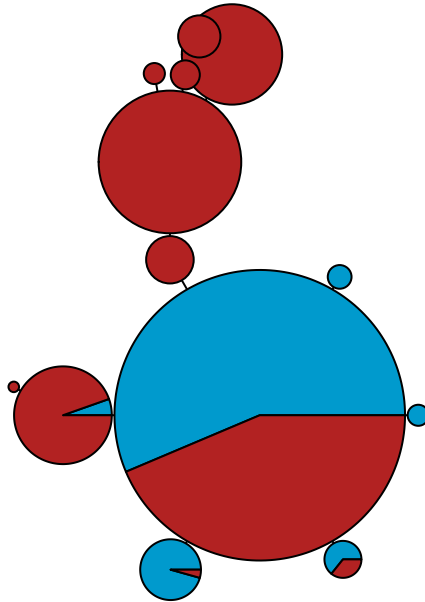

Figure S326. MBPA\_000054110

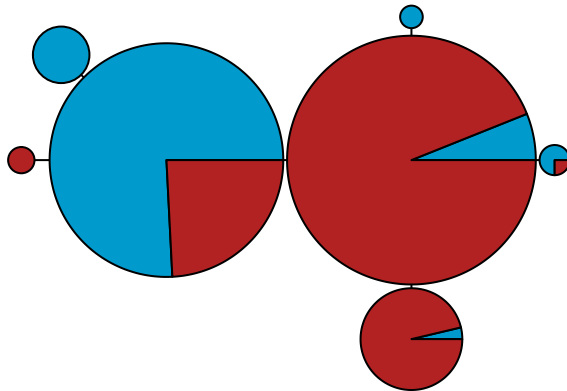

Figure S327. MBPA\_000054249

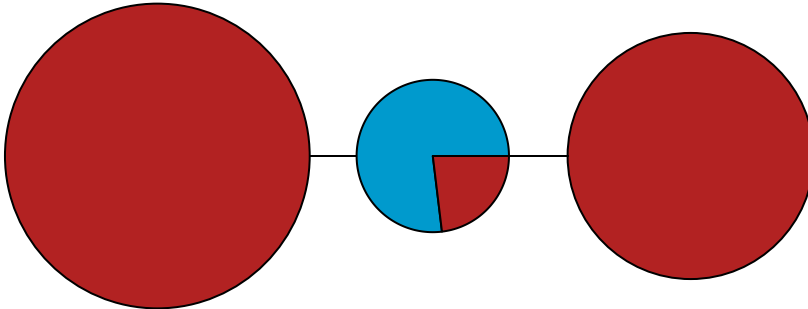



Figure S328. MBPA\_000054334 Metazoa

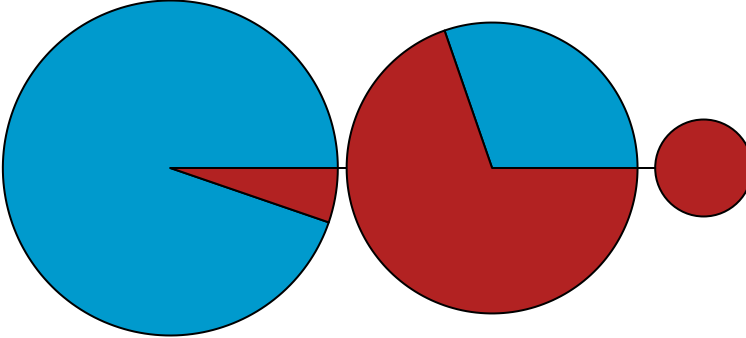

Figure S329. MBPA\_000054777 Metazoa

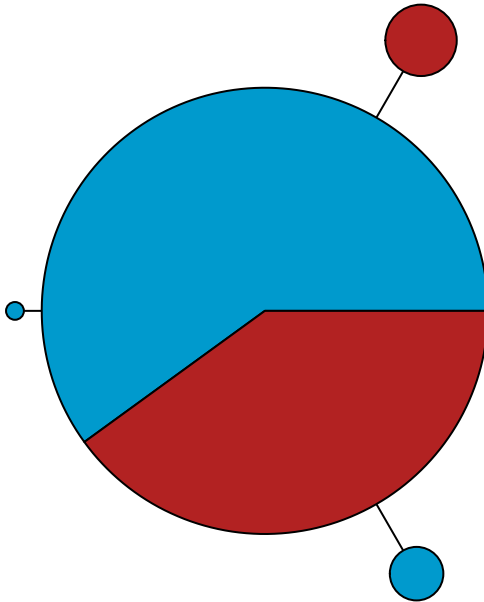

Figure S330. MBPA\_000055452 Metazoa

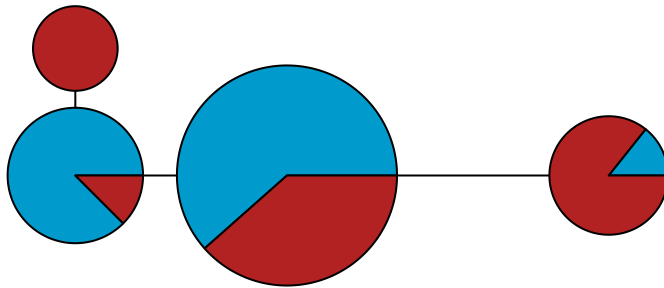

Figure S331. MBPA\_000055600

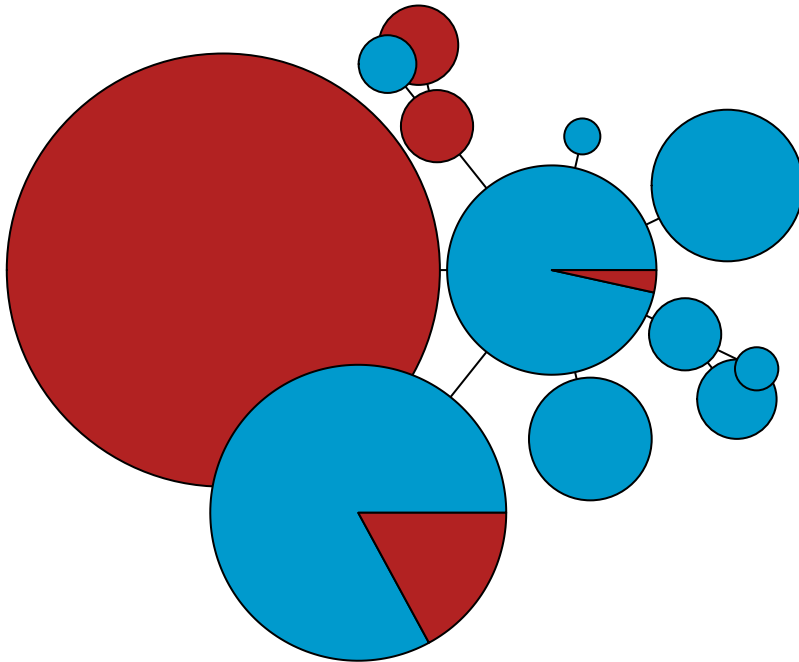

Figure S332. MBPA\_000056965 Metazoa

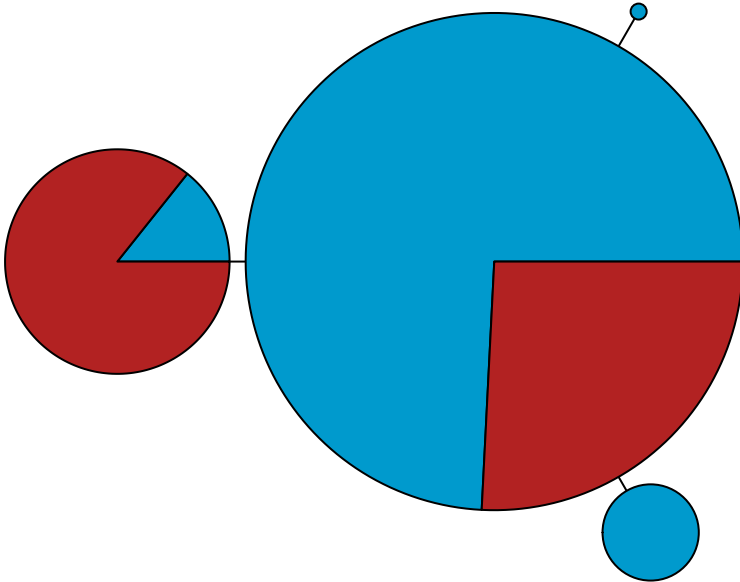

Figure S333. MBPA\_000057470 Rhodophyta

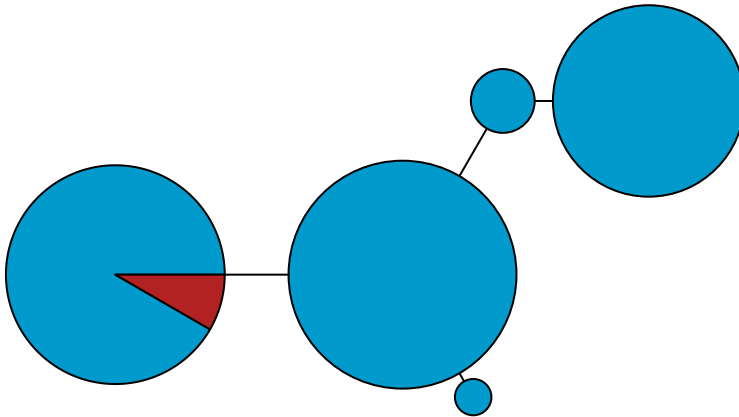

Figure S334. MBPA\_000058489 Stramenopiles

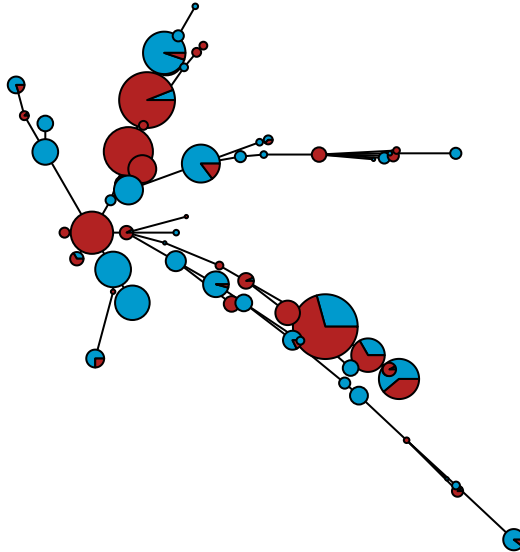

Figure S335. MBPA\_000060150 Rhodophyta

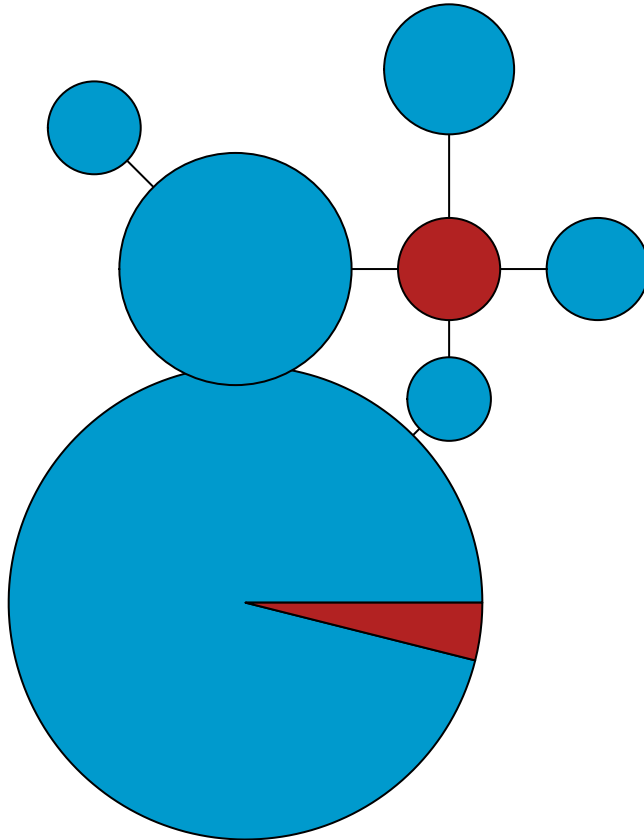



Figure S336. MBPA\_000060921 Metazoa

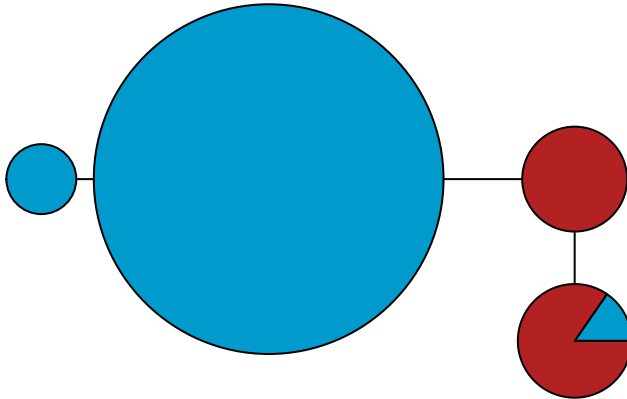

Figure S337. MBPA\_000061051 Stramenopiles

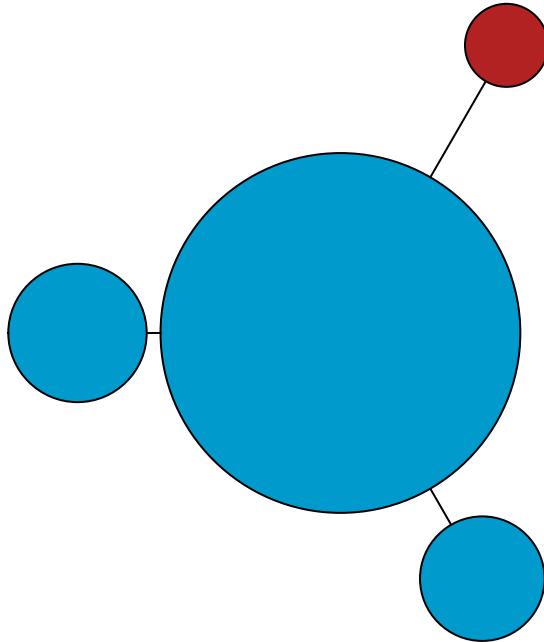

Figure S338. MBPA\_000061226 Metazoa

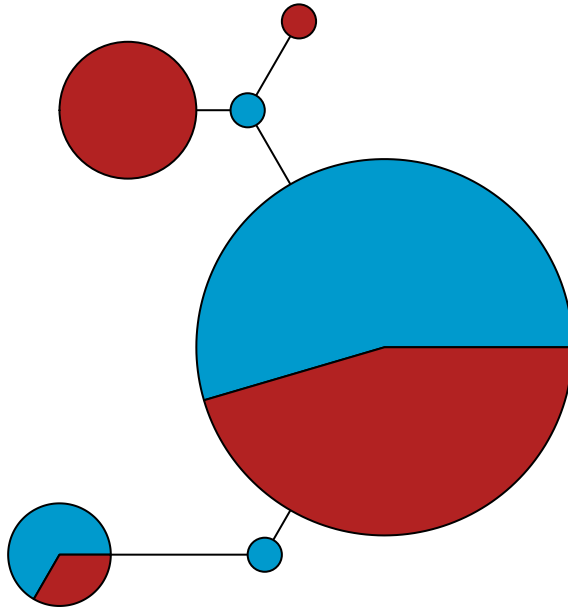

Figure S339. MBPA\_000061821 Rhodophyta

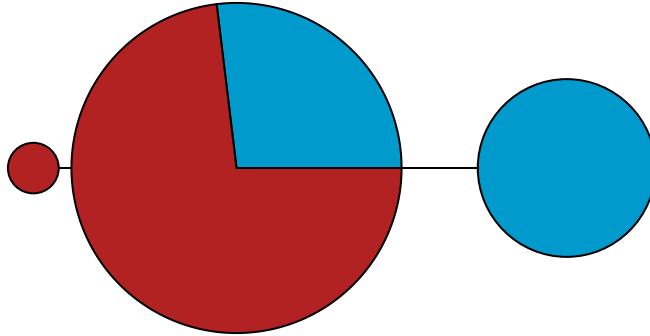

Figure S340. MBPA\_000062823 Rhodophyta

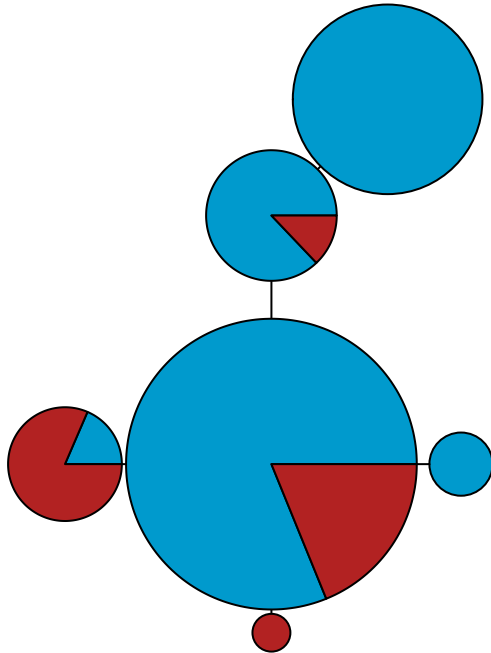

Figure S341. MBPA\_000063504 Metazoa

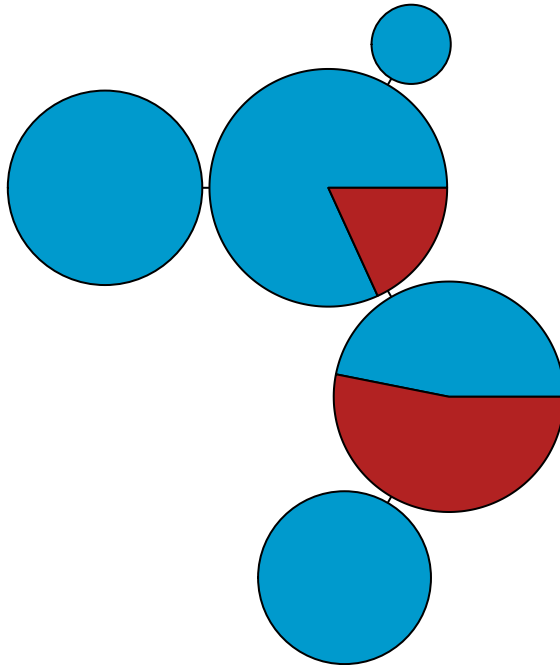

Figure S342. MBPA\_000064145 Metazoa

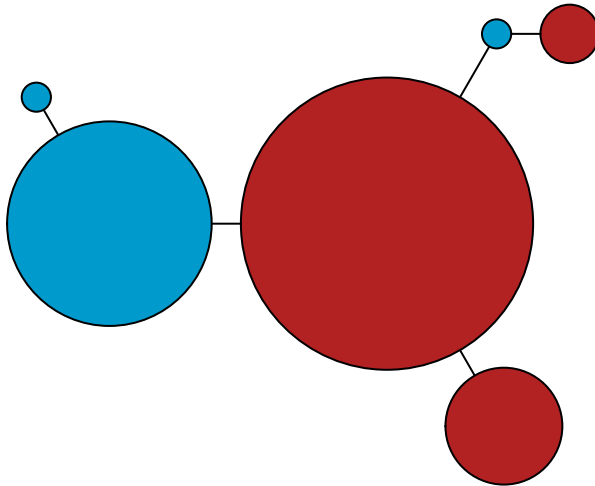

Figure S343. MBPA\_000065282 Metazoa

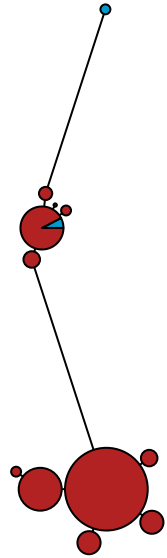



Figure S344. MBPA\_000065793 Metazoa

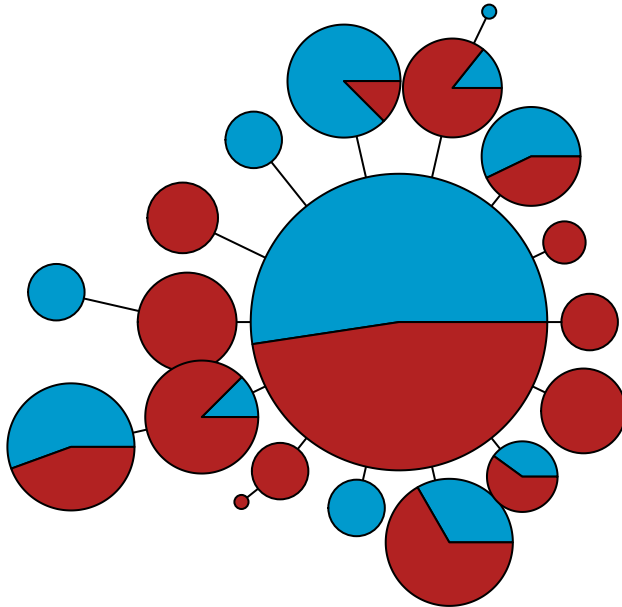

Figure S345. MBPA\_000068277 Metazoa

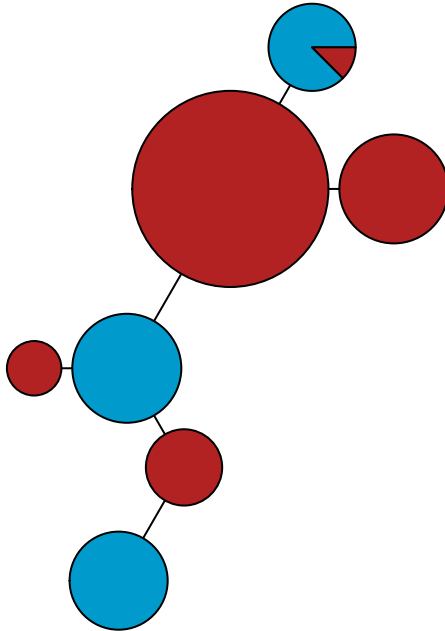

Figure S346. MBPA\_000069234 Metazoa

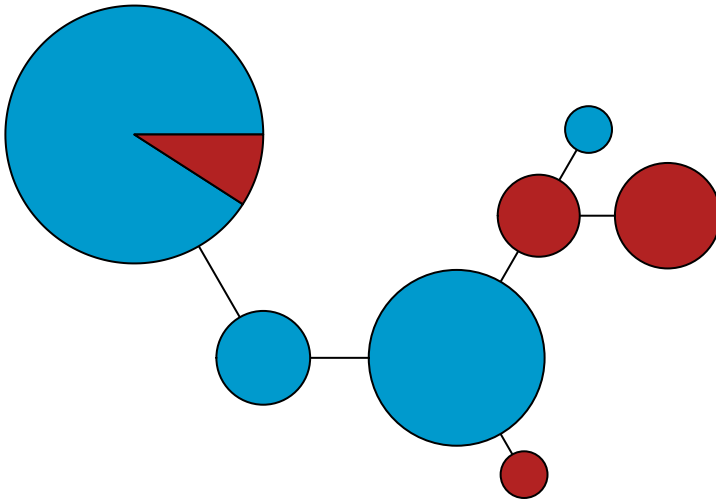



Figure S348. MBPA\_000071470 Stramenopiles

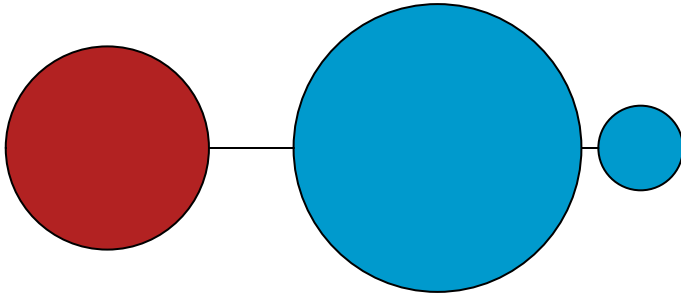

Figure S349. MBPA\_000071968 Metazoa

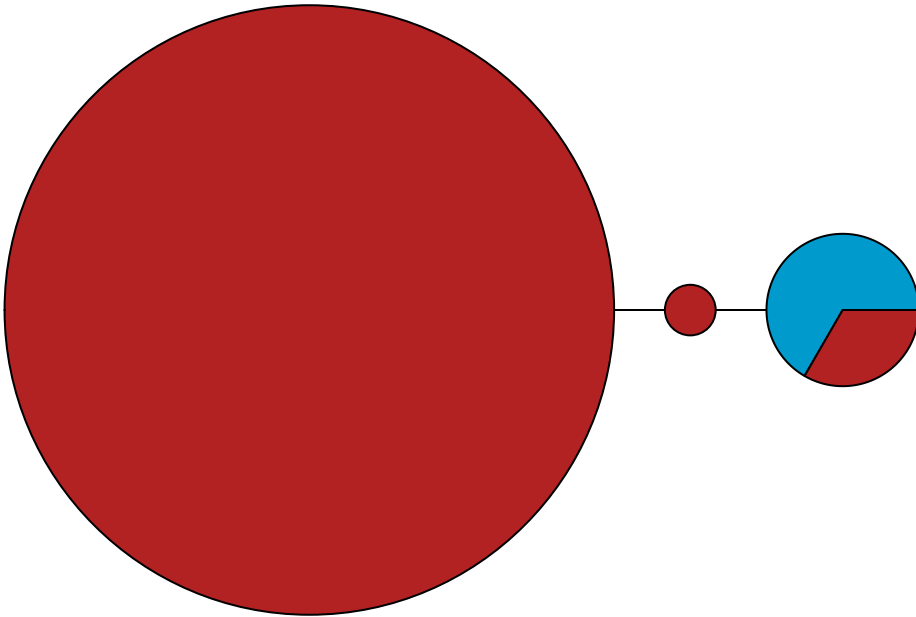

Figure S350. MBPA\_000072398 Stramenopiles

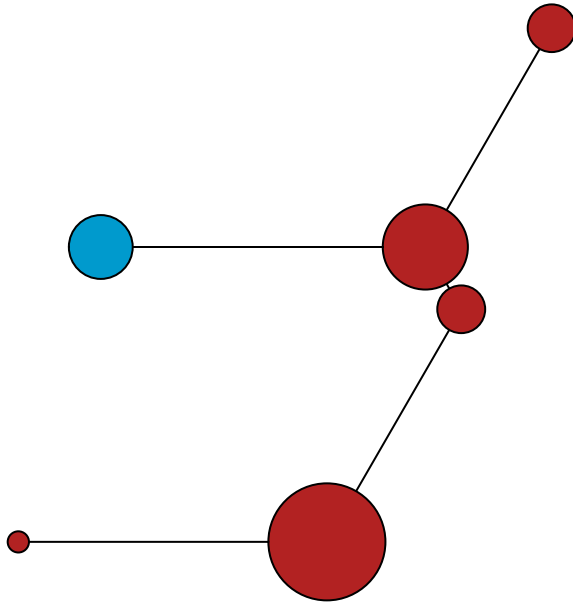

Figure S351. MBPA\_000072895

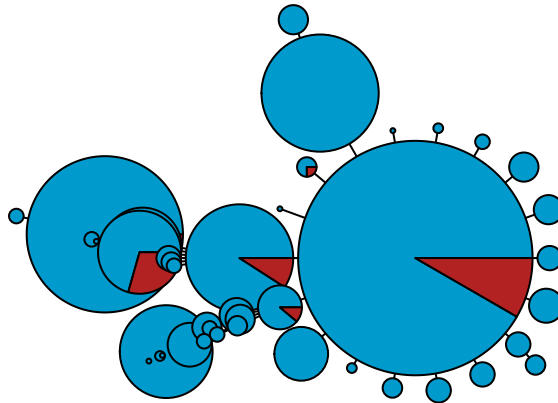



Figure S352. MBPA\_000074040 Rhodophyta

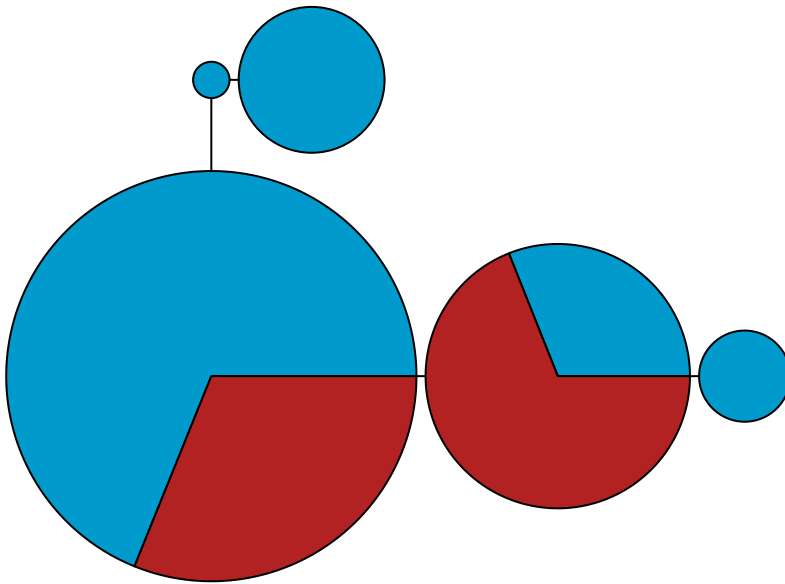

Figure S353. MBPA\_000076199

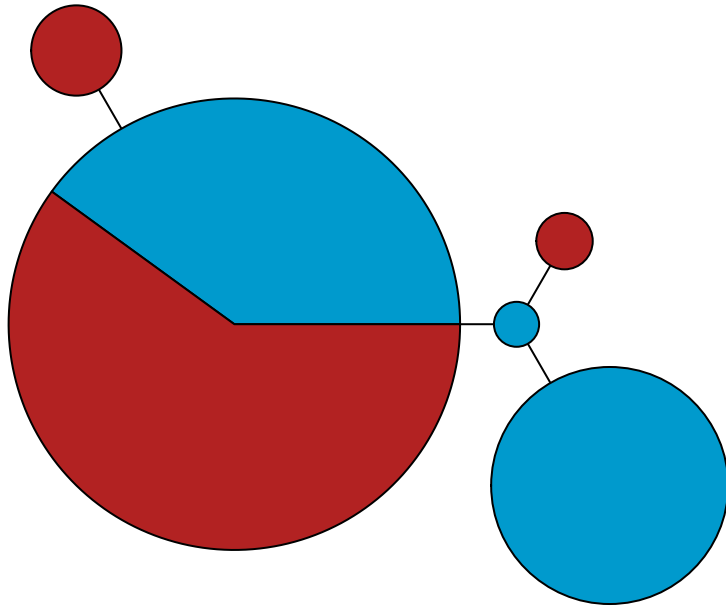

Figure S354. MBPA\_000080298 Stramenopiles

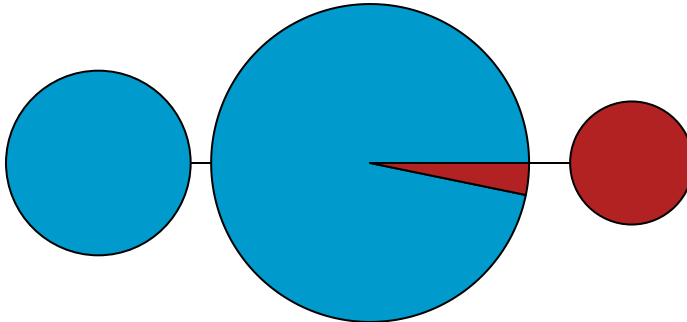

Figure S355. MBPA\_000080538 Metazoa

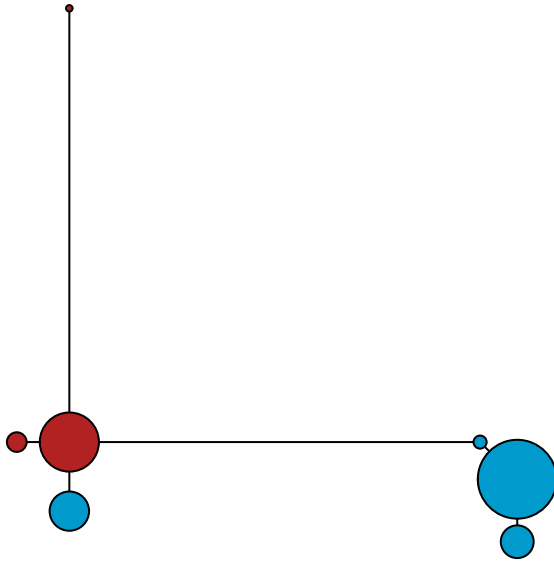

Figure S356. MBPA\_000083133 Metazoa

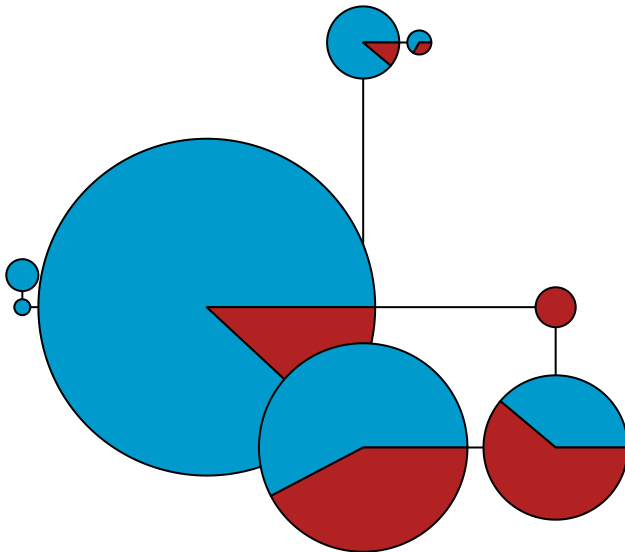

Figure S357. MBPA\_000083685 Stramenopiles

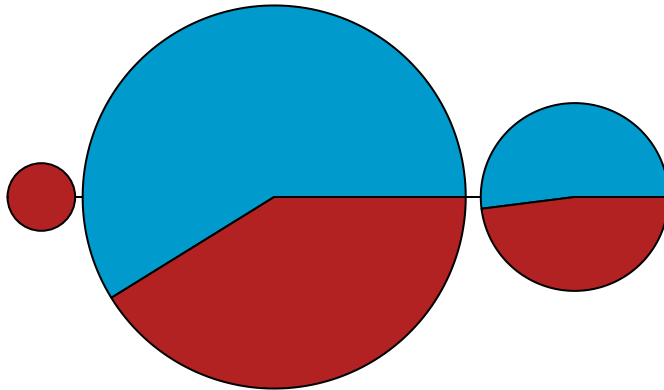

Figure S358. MBPA\_000084918 Stramenopiles

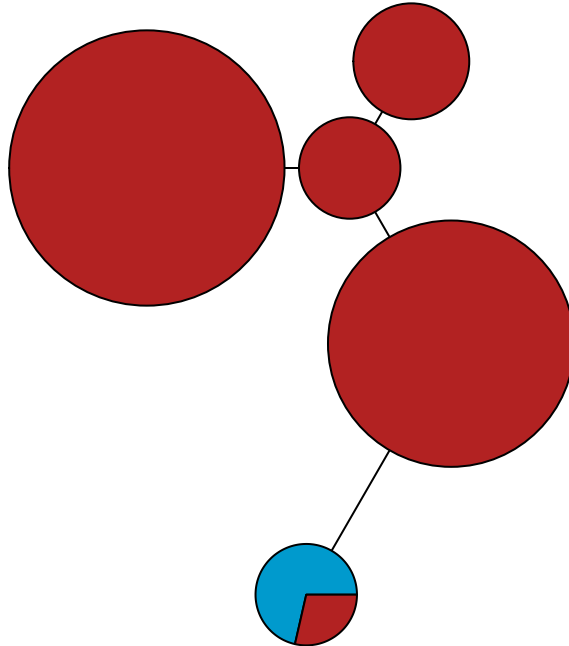

Figure S359. MBPA\_000087707 Metazoa

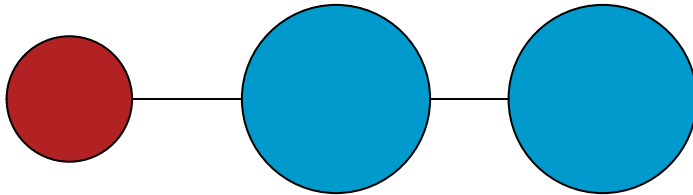



Figure S360. MBPA\_000089403

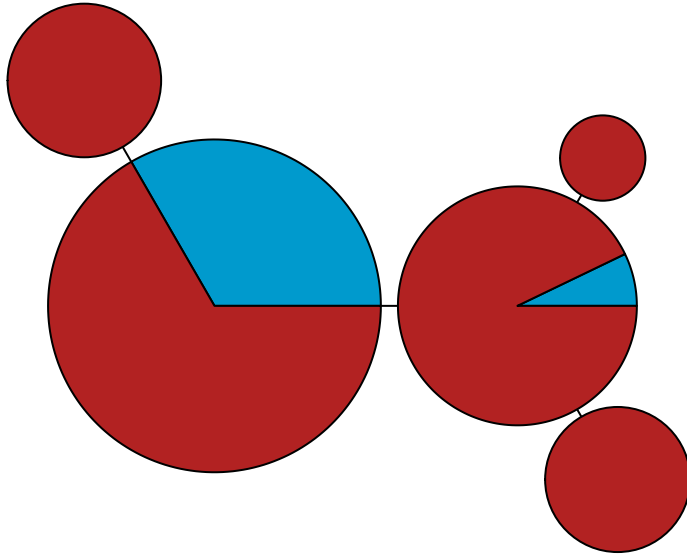

Figure S361. MBPA\_000089929 Stramenopiles

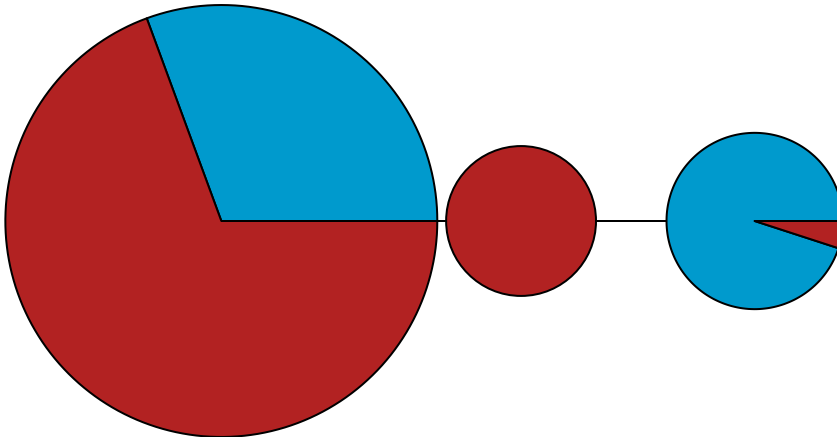

Figure S362. MBPA\_000090227 Metazoa

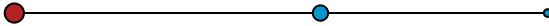

Figure S363. MBPA\_000092583 Metazoa

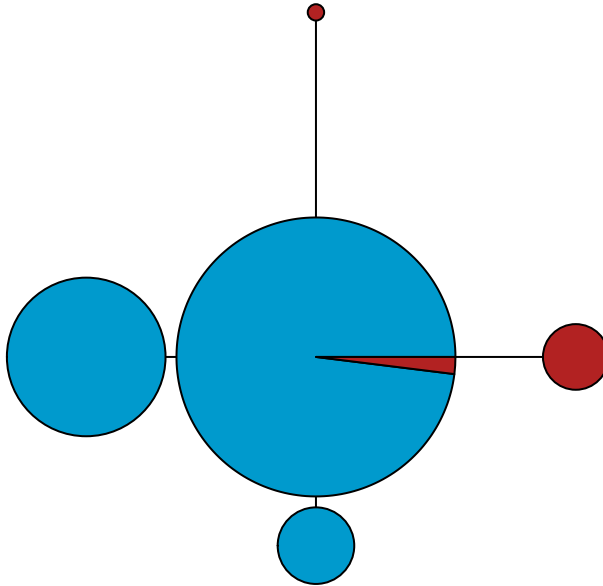

Figure S364. MBPA\_000092639 Metazoa

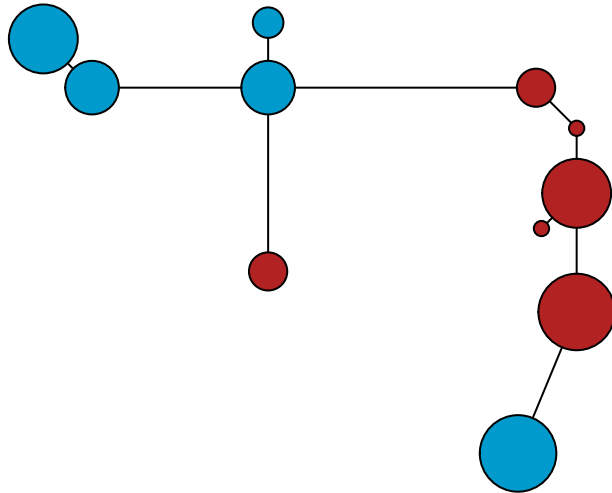

Figure S365. MBPA\_000092849 Metazoa

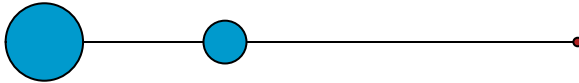

Figure S366. MBPA\_000093092 Stramenopiles

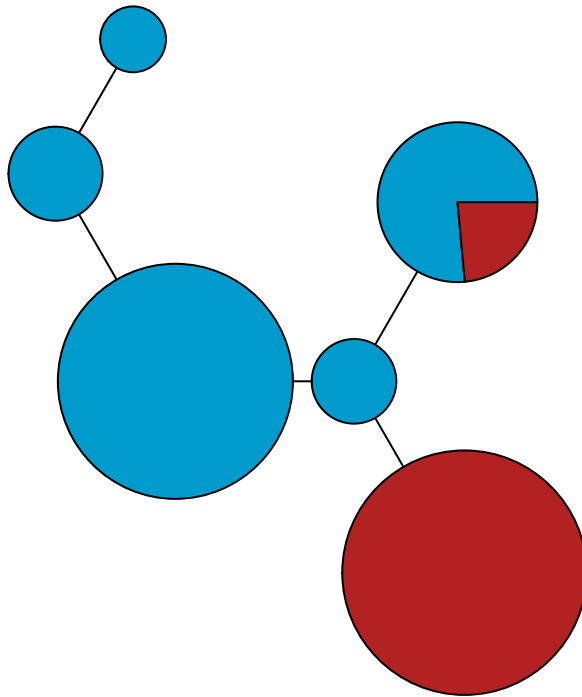

Figure S367. MBPA\_000095064 Rhodophyta

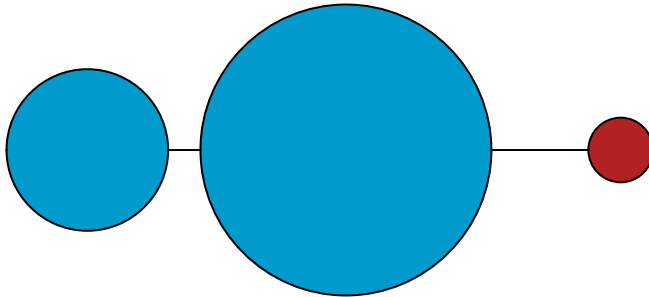



Figure S368. MBPA\_000097088 Metazoa

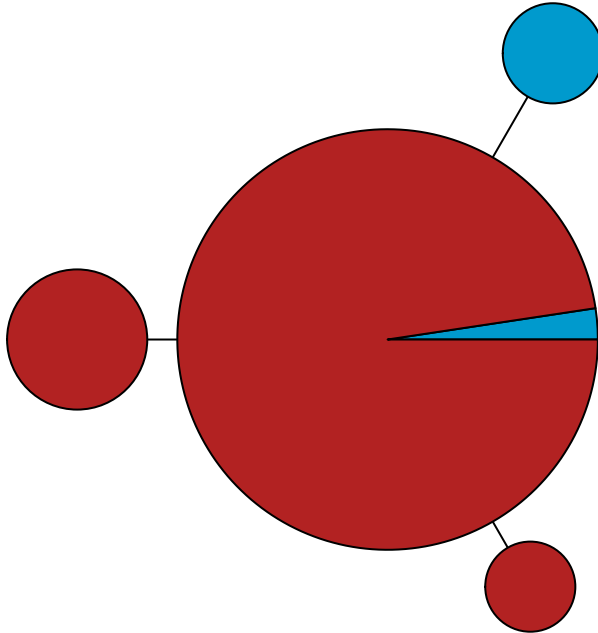

Figure S369. MBPA\_000099451

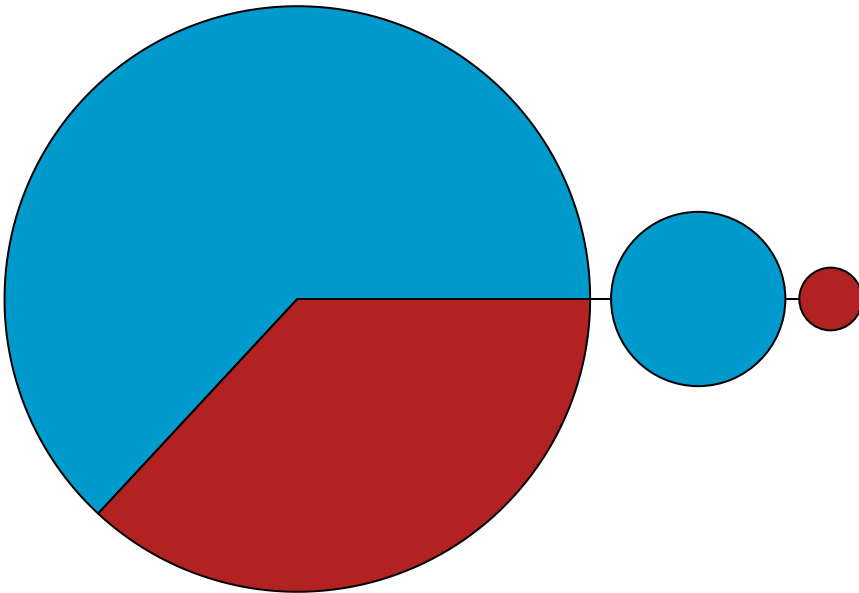

Figure S370. MBPA\_000099769

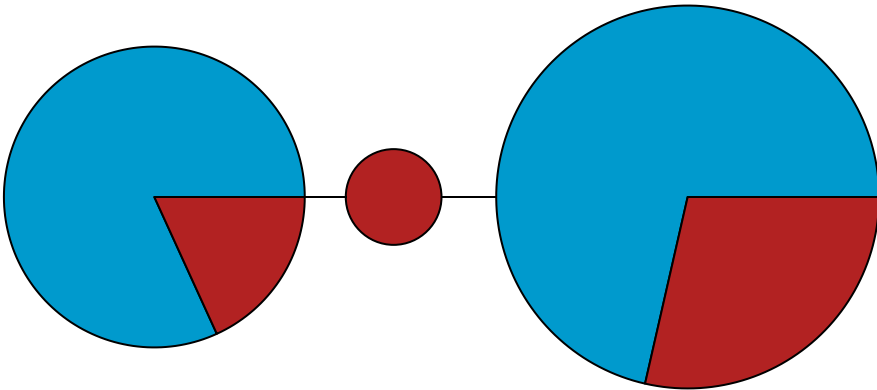

Figure S371. MBPA\_000103432 Lobosa

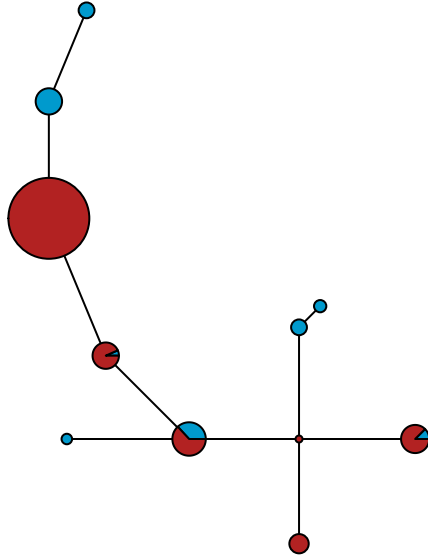

Figure S372. MBPA\_000104492 Metazoa

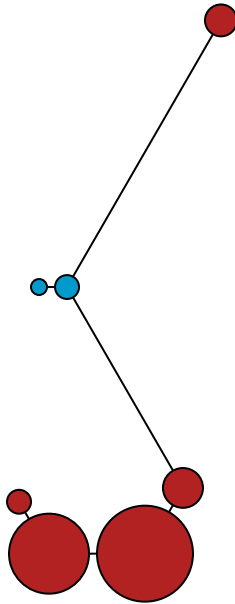

Figure S373. MBPA\_000105646 Rhodophyta

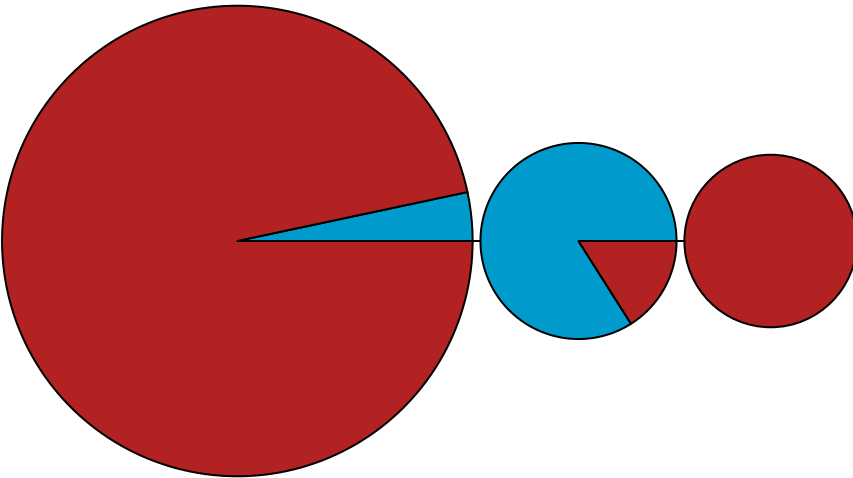

Figure S374. MBPA\_000105665 Metazoa

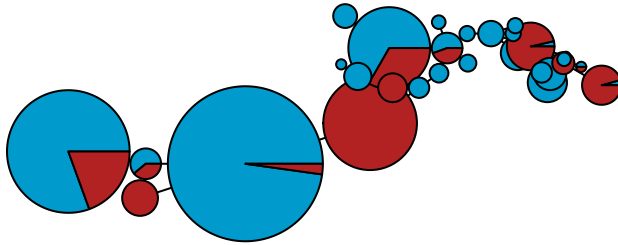

Figure S375. MBPA\_000105765

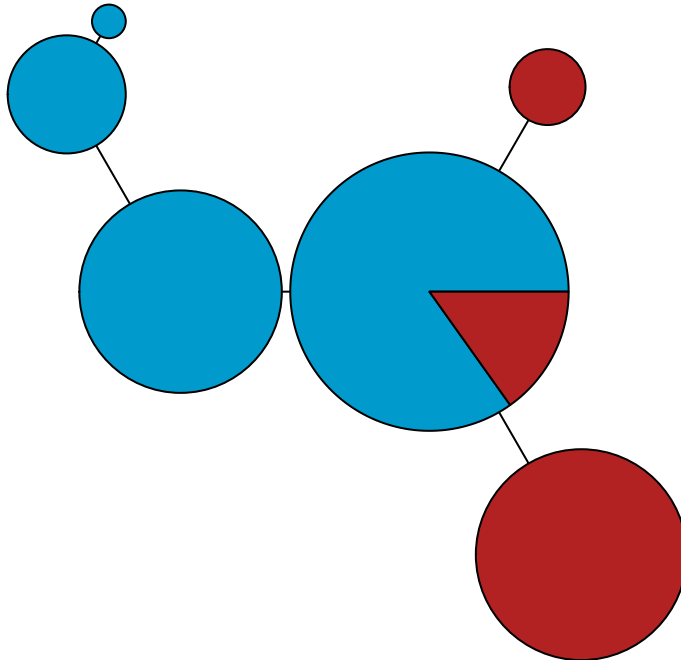



Figure S376. MBPA\_000106995 Stramenopiles

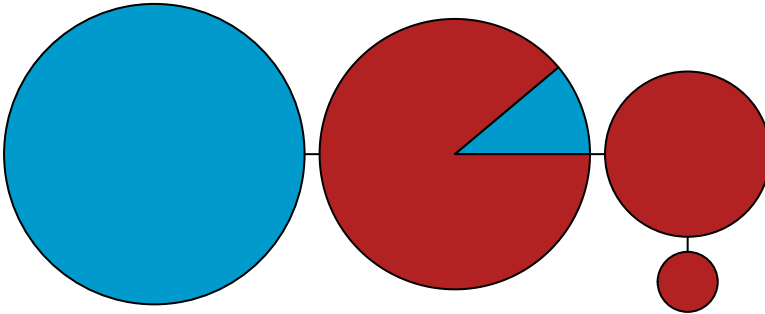



Figure S378. MBPA\_000111858 Rhodophyta

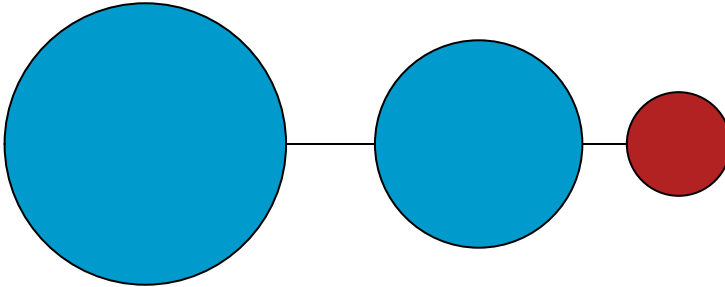

Figure S379. MBPA\_000117637 Metazoa

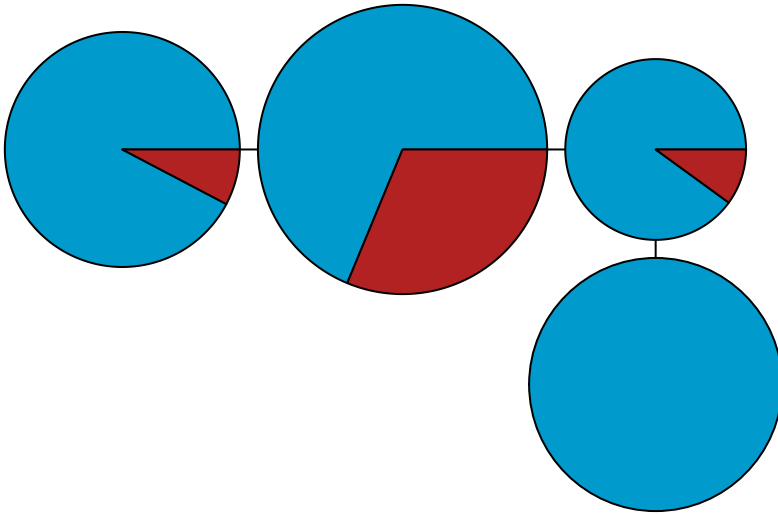

Figure S380. MBPA\_000123345

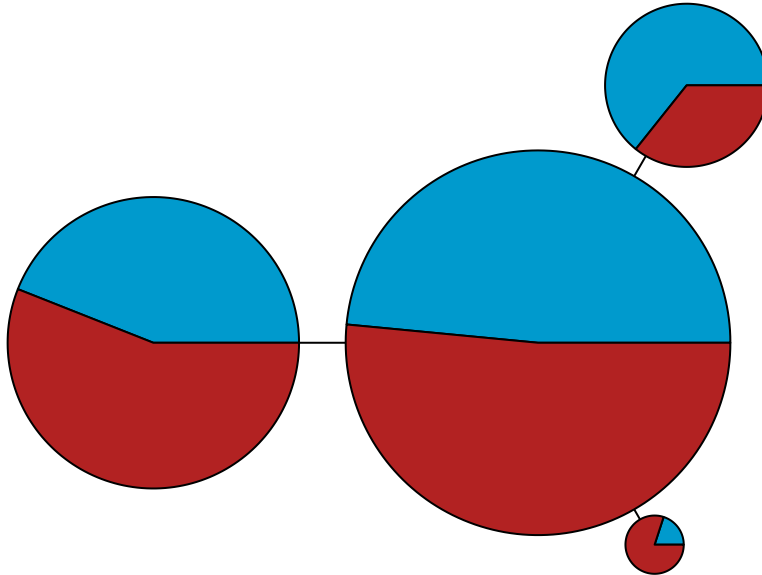

Figure S381. MBPA\_000123662 Stramenopiles

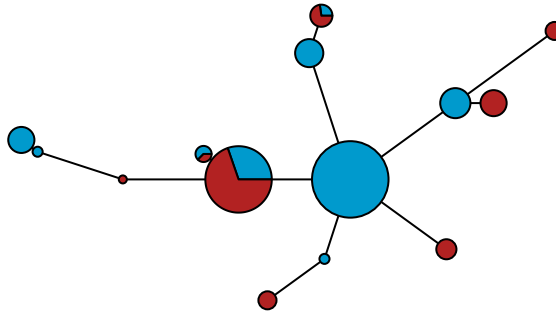

Figure S382. MBPA\_000124145 Stramenopiles

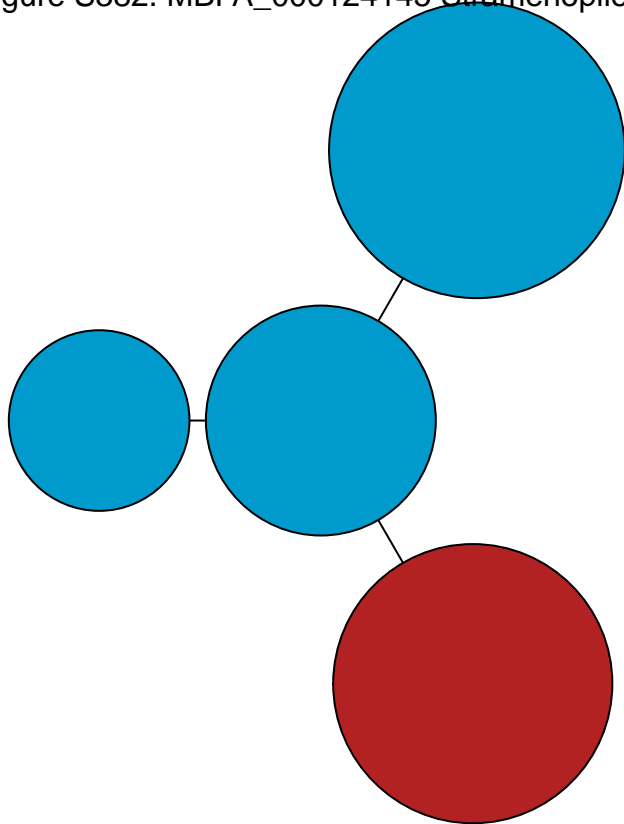

Figure S383. MBPA\_000124425

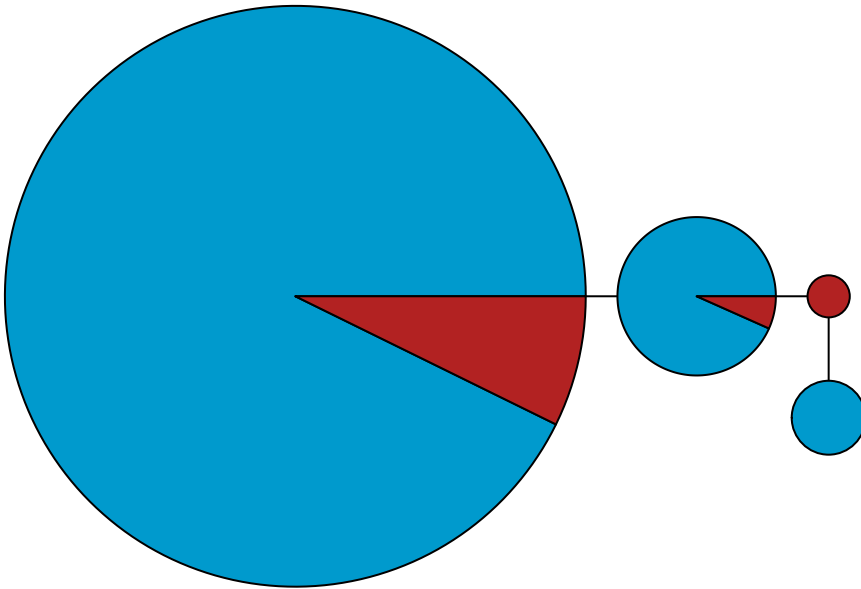



Figure S384. MBPA\_000126019

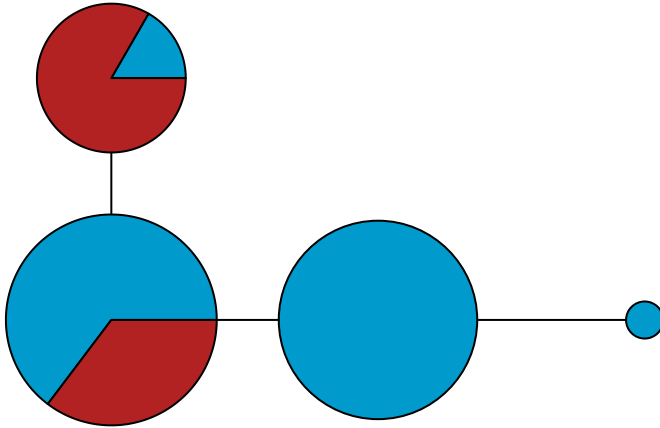

Figure S385. MBPA\_000130732 Metazoa

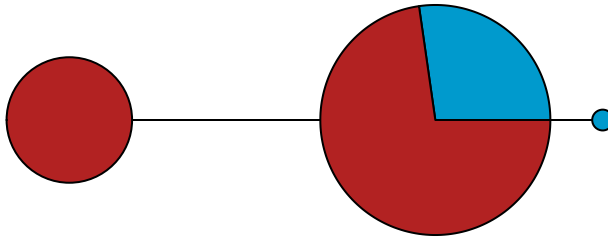

Figure S386. MBPA\_000134877 Metazoa

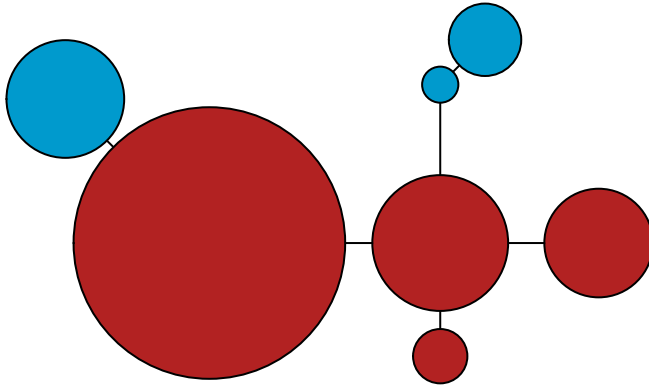

Figure S387. MBPA\_000136012 Stramenopiles

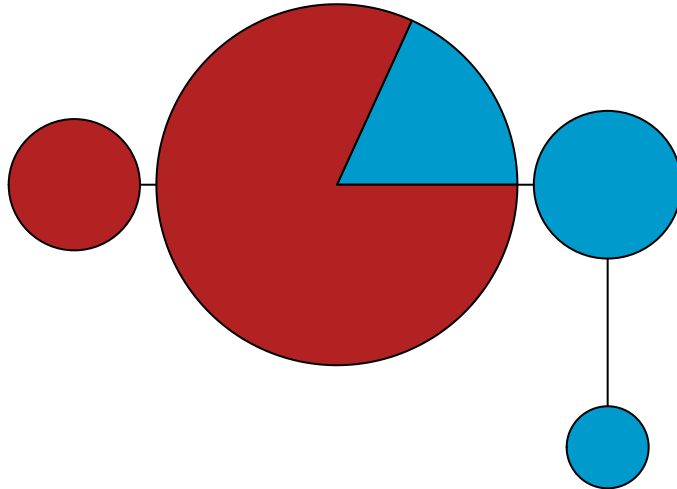



Figure S389. MBPA\_000157139 Stramenopiles

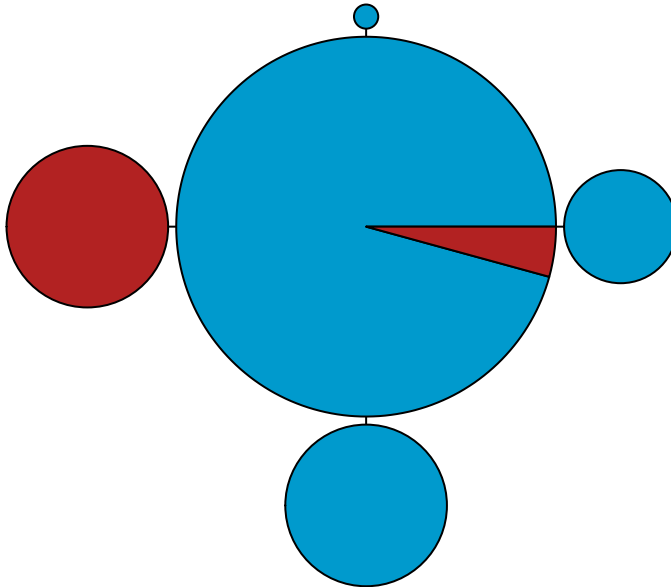

Figure S390. MBPA\_000157502 Stramenopiles

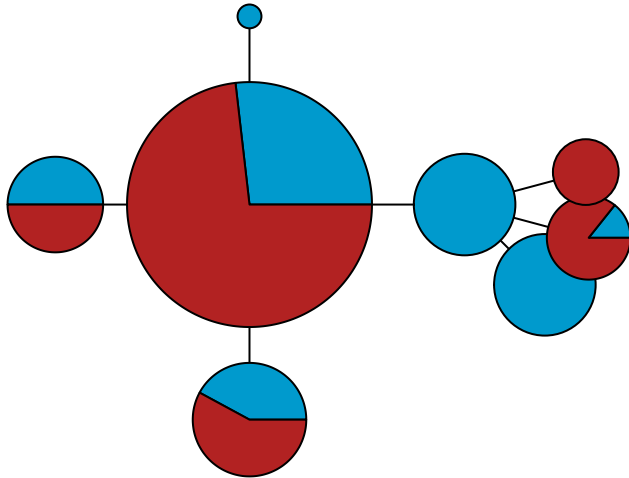

Figure S391. MBPA\_000158774 Metazoa

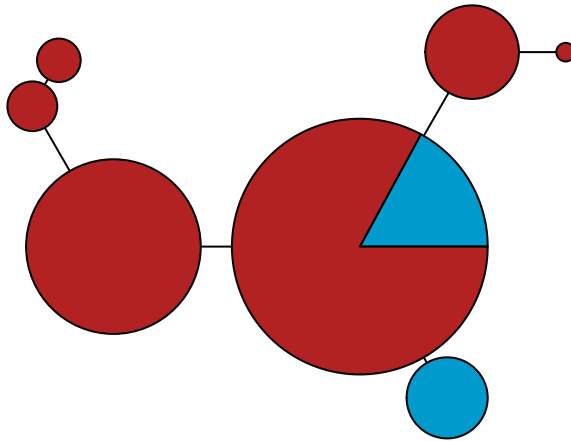



Figure S392. MBPA\_000170237

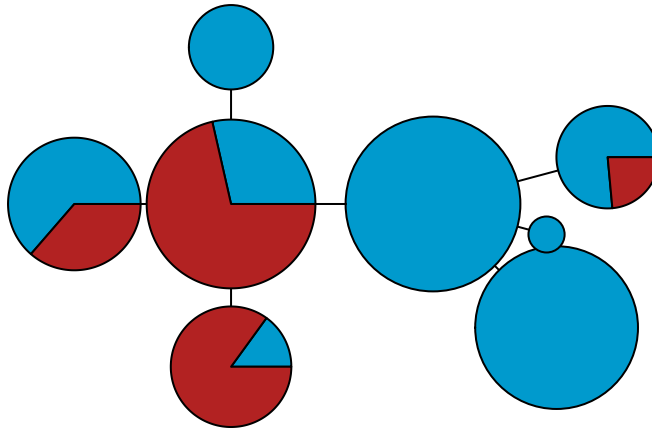

Figure S393. MBPA\_000175827 Rhodophyta

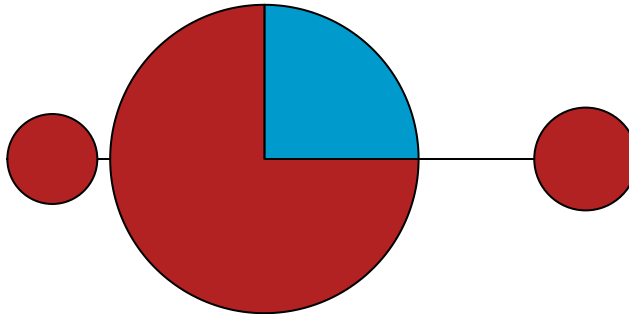

Figure S394. MBPA\_000178984 Metazoa

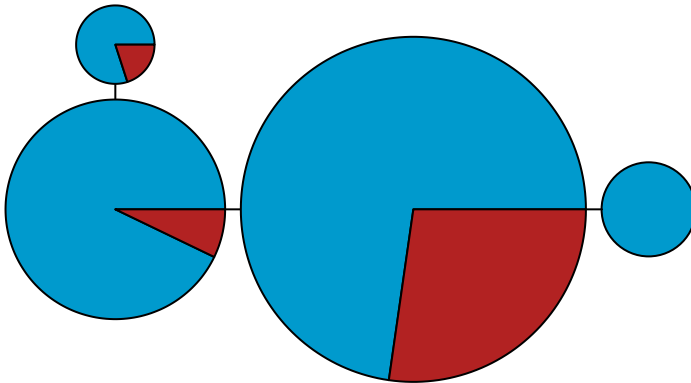

Figure S395. MBPA\_000182011 Stramenopiles

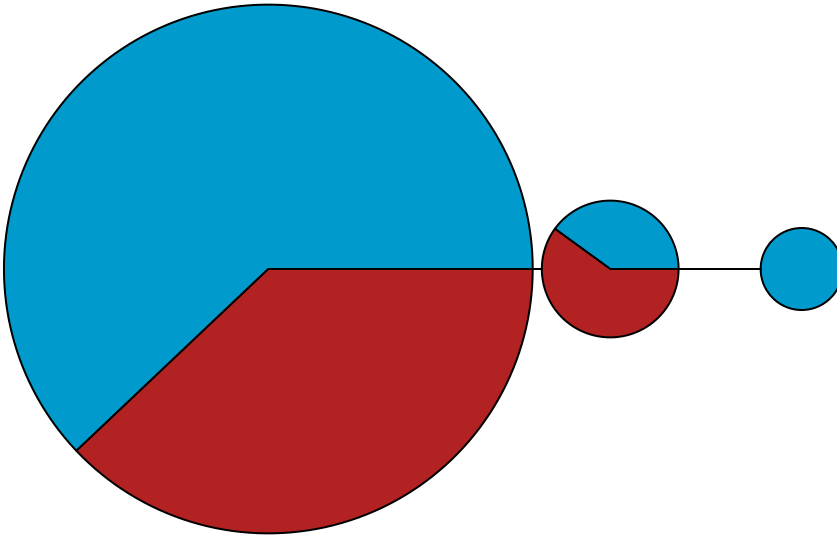

Figure S396. MBPA\_000183538 Stramenopiles

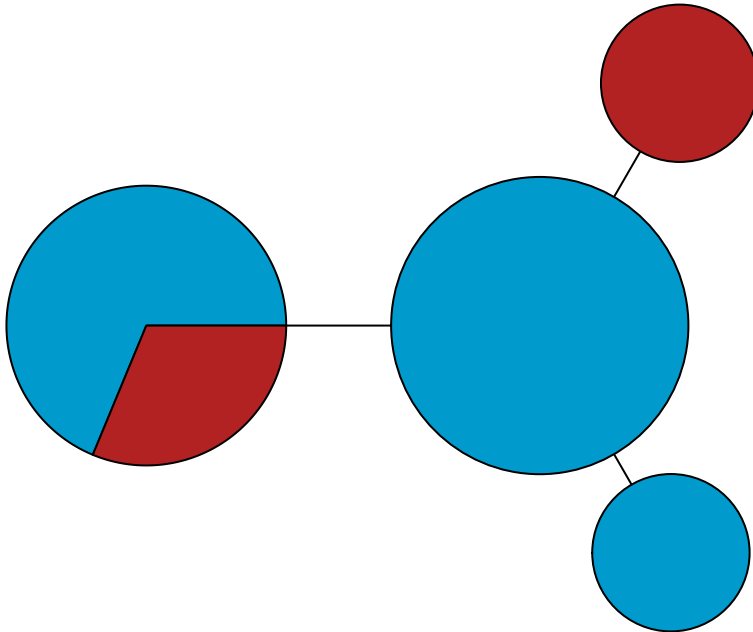

Figure S397. MBPA\_000193298 Metazoa

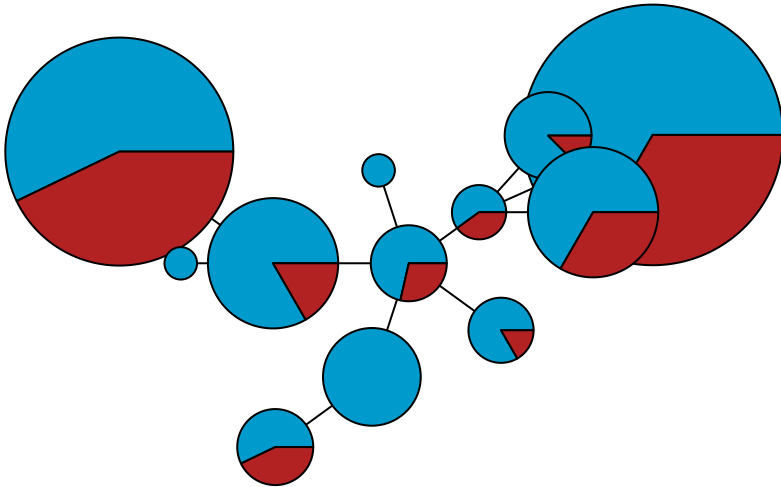

Figure S398. MBPA\_000195626

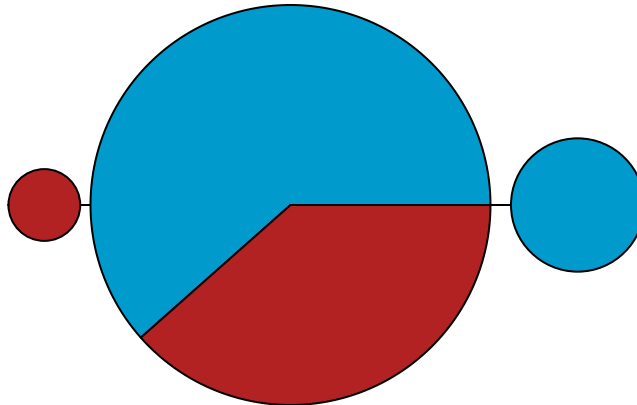

Figure S399. MBPA\_000205830

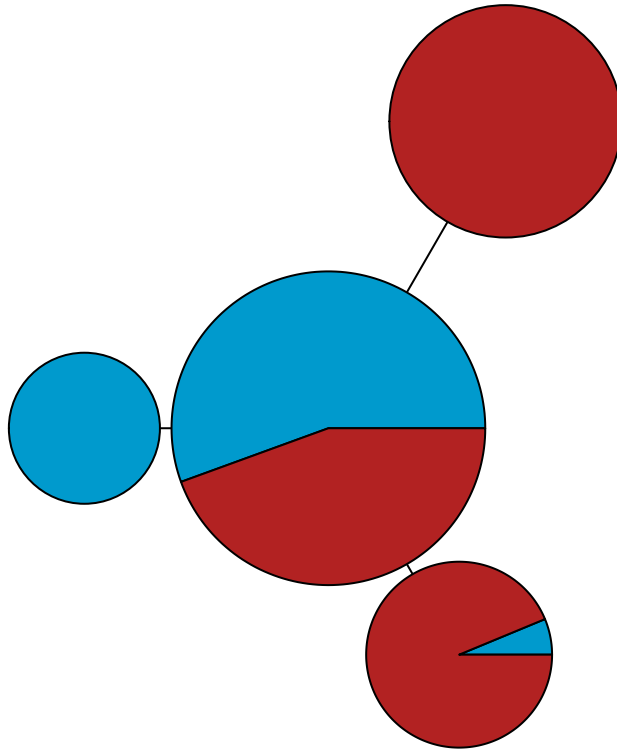



Figure S400. MBPA\_000206007

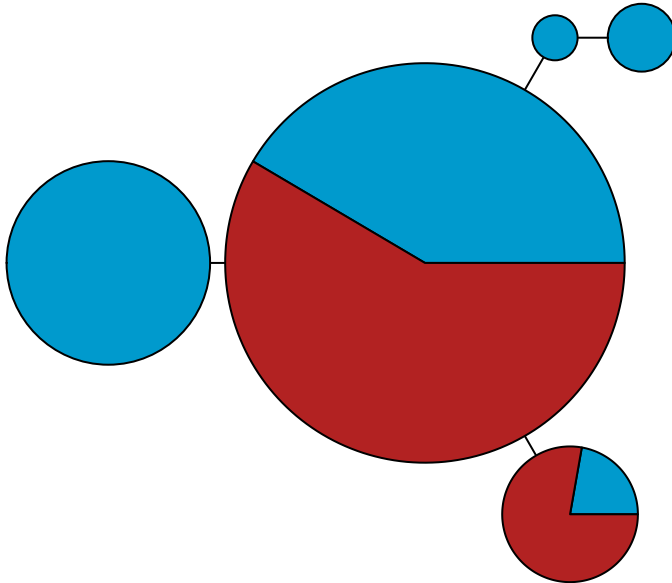

Figure S401. MBPA\_000209094

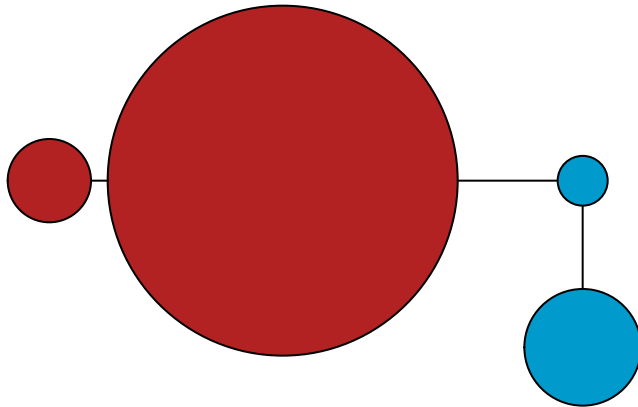

Figure S402. MBPA\_000214230 Rhodophyta

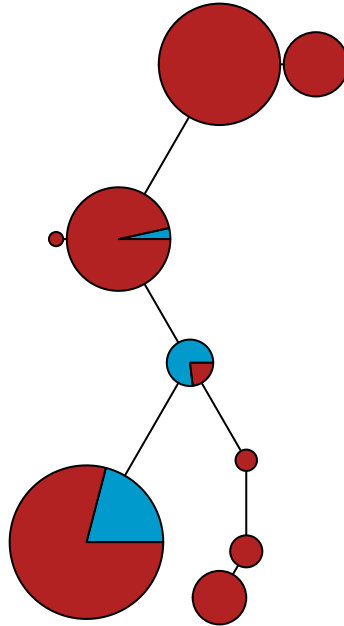

Figure S403. MBPA\_000217727 Stramenopiles

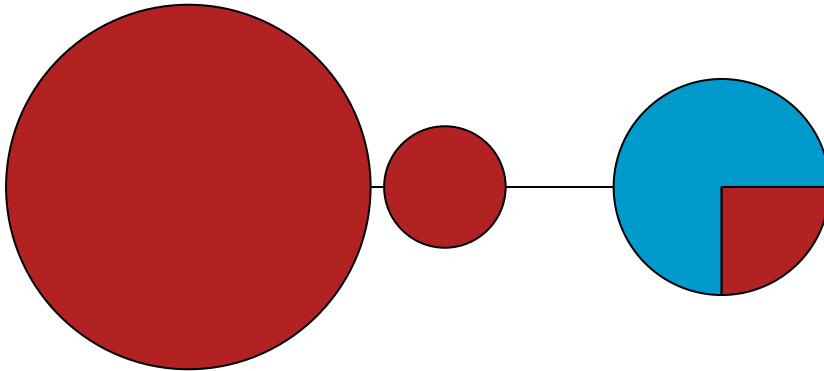

Figure S404. MBPA\_000217887 Stramenopiles

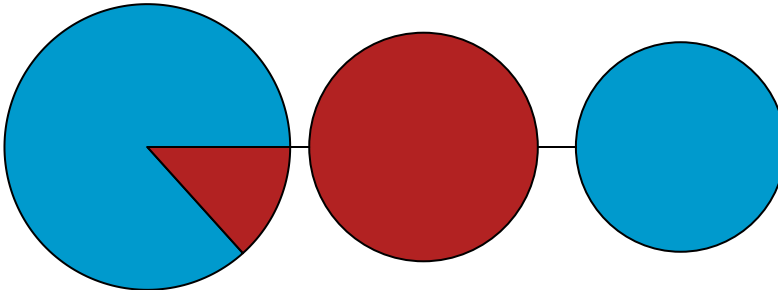

Figure S405. MBPA\_000221050

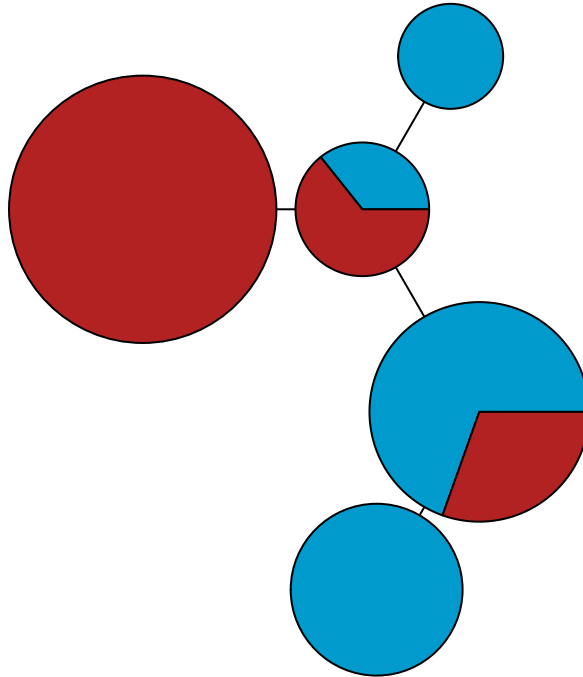

Figure S406. MBPA\_000223760 Stramenopiles

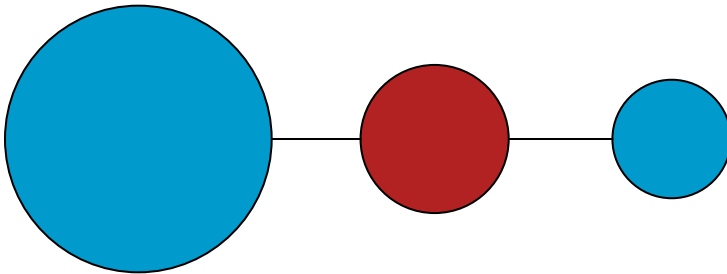

Figure S407. MBPA\_000224754 Hacrobia

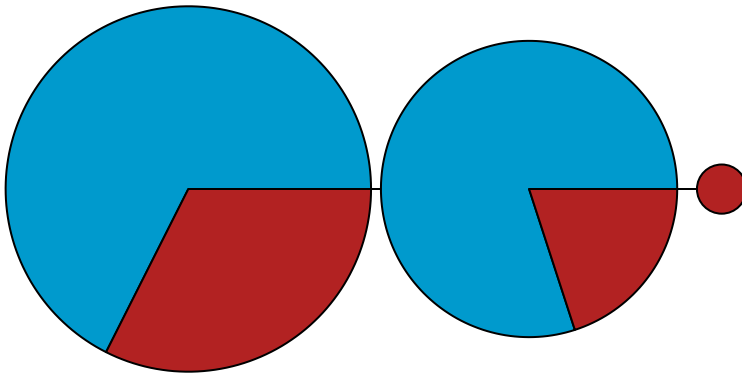



Figure S408. MBPA\_000228037 Metazoa

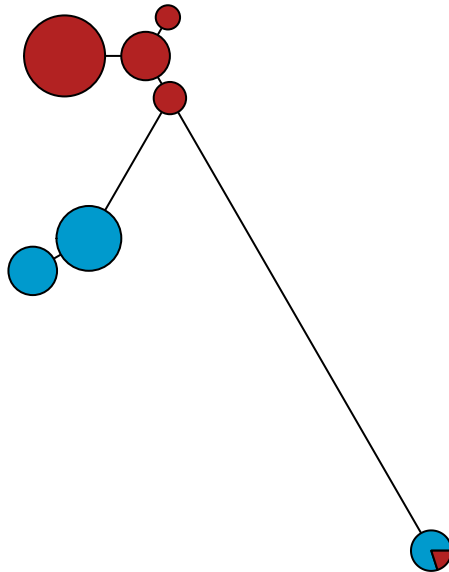

Figure S409. MBPA\_000228040 Metazoa

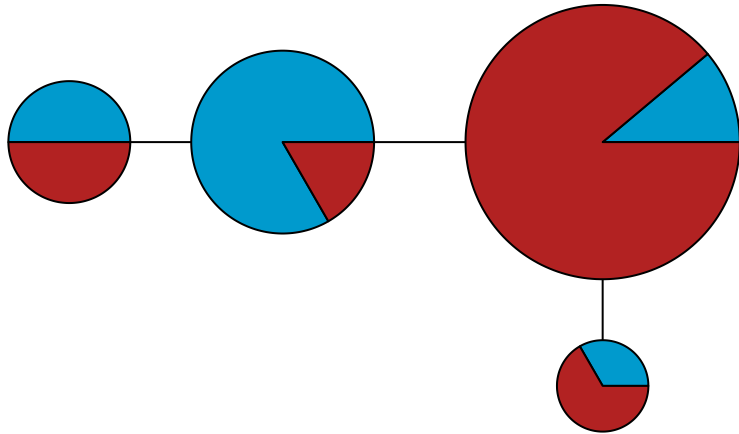

Figure S410. MBPA\_000230114

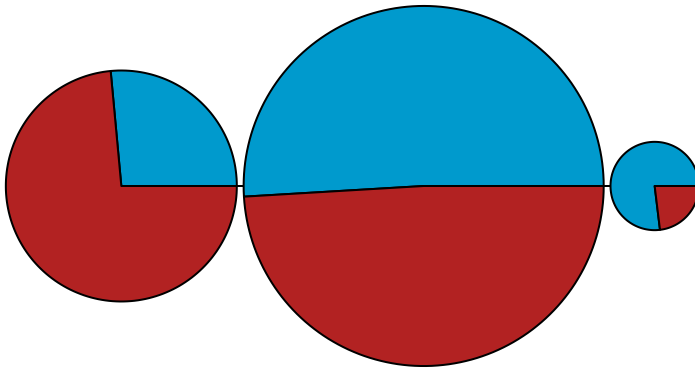

Figure S411. MBPA\_000242347 Rhodophyta

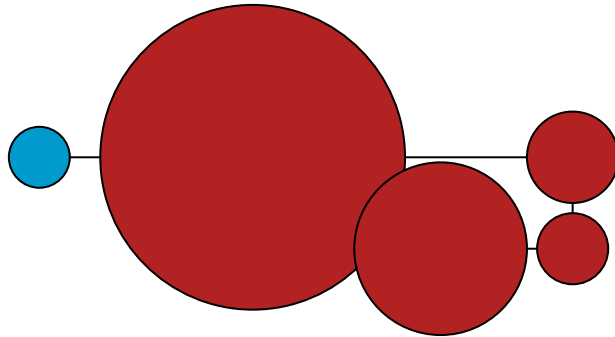

Figure S412. MBPA\_000261919 Metazoa

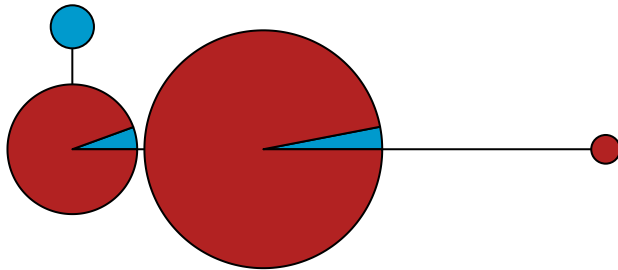

Figure S413. MBPA\_000268858 Viridiplantae

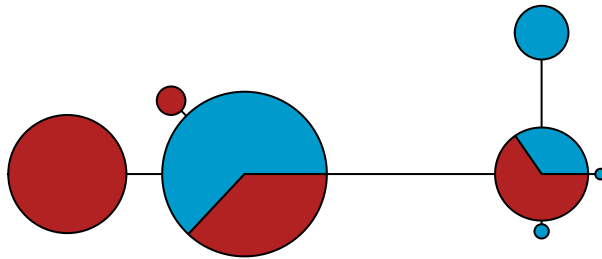

Figure S414. MBPA\_000268936 Metazoa

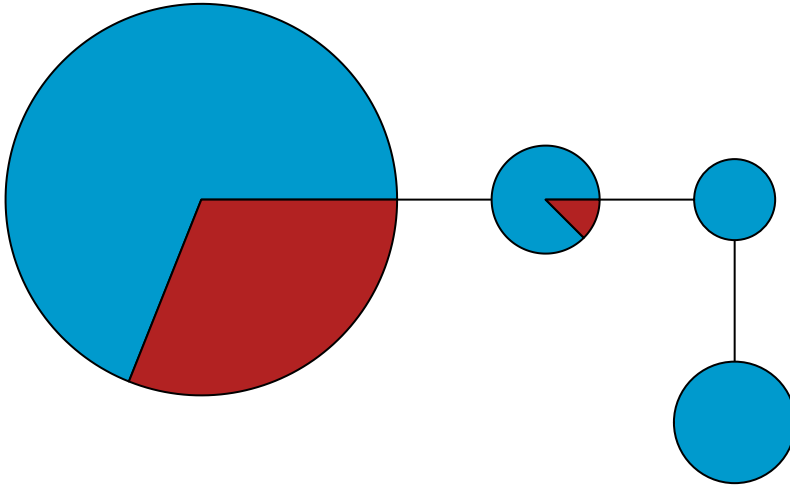

Figure S415. MBPA\_000278260 Metazoa

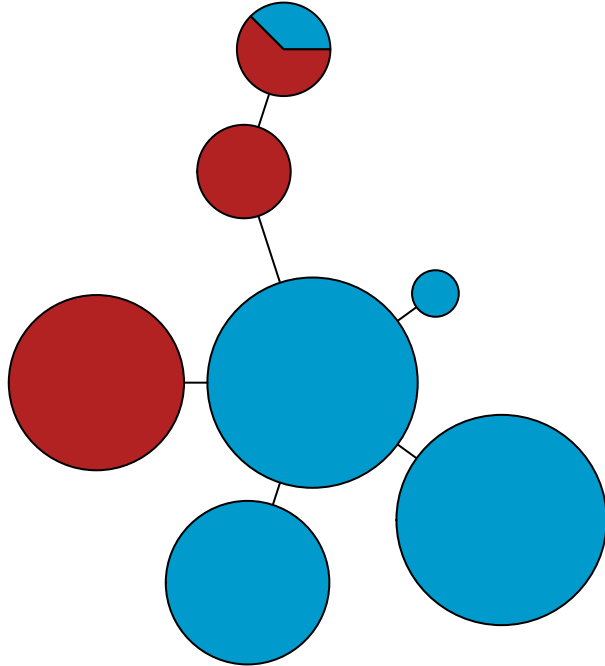



Figure S416. MBPA\_000290334 Metazoa

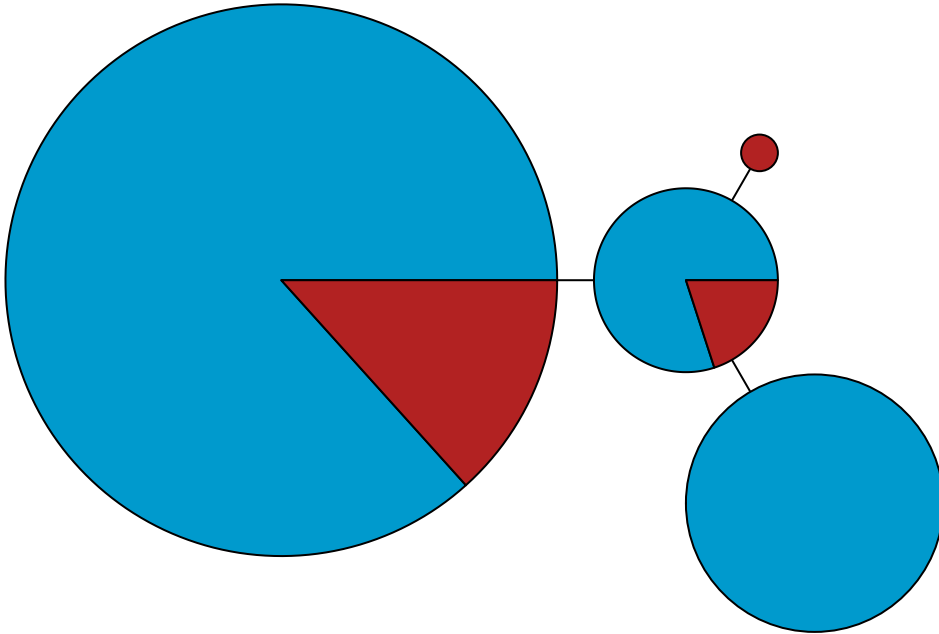

Figure S417. MBPA\_000298014 Rhodophyta

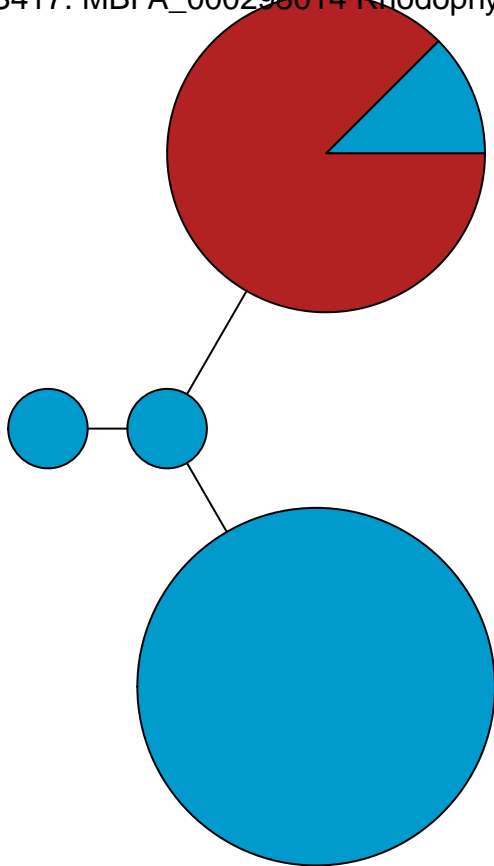

Figure S418. MBPA\_000300574

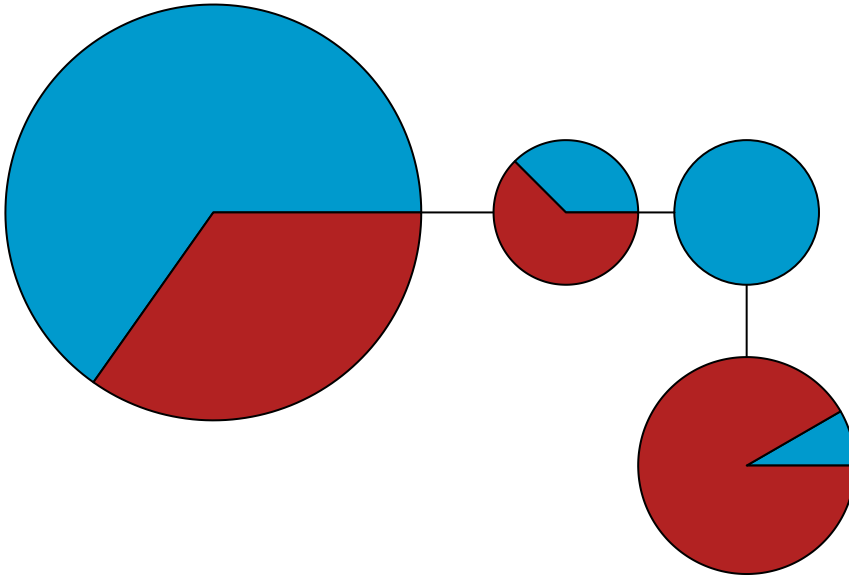

Figure S419. MBPA\_000307595 Metazoa

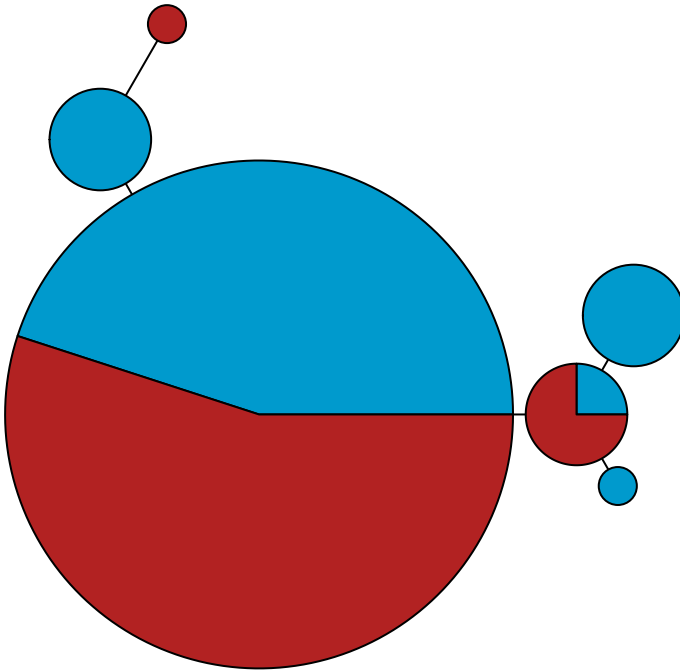

Figure S420. MBPA\_000326515

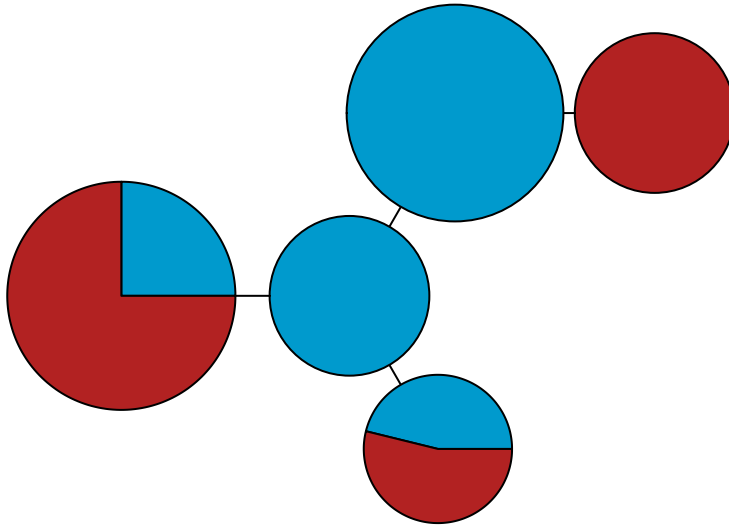

Figure S421. MBPA\_000330949

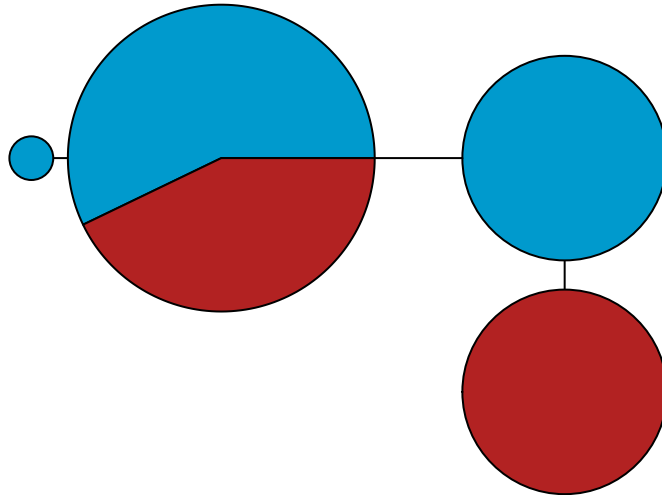

Figure S422. MBPA\_000341561 Hacrobia

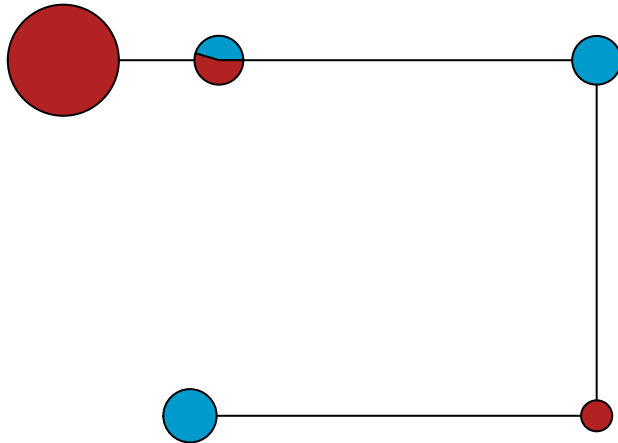

Figure S423. MBPA\_000354144 Stramenopiles

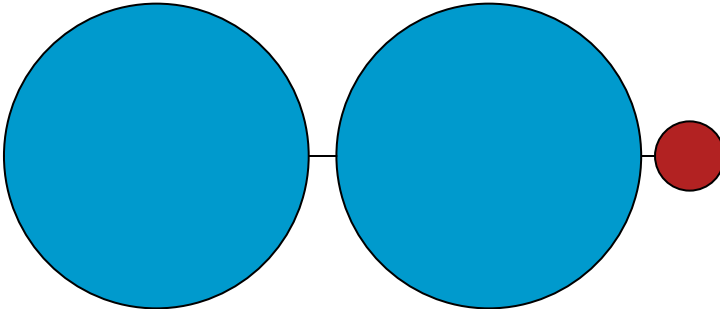



Figure S424. MBPA\_000389095 Metazoa

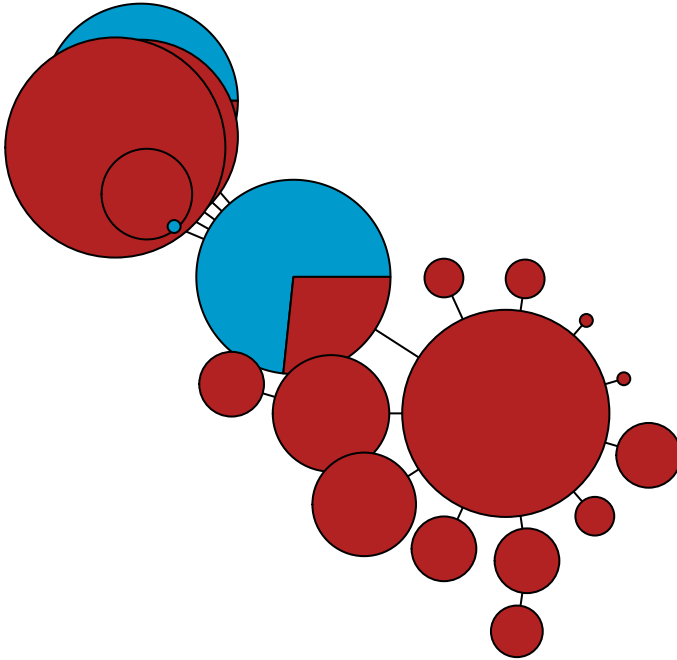

Figure S425. MBPA\_000451838

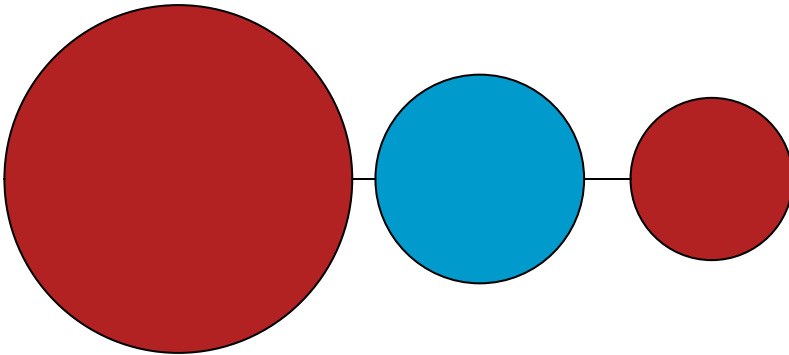

Figure S426. MBPA\_000464129 Metazoa

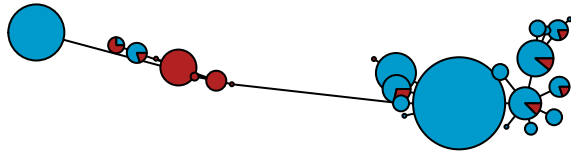

Figure S427. MBPA\_000533475

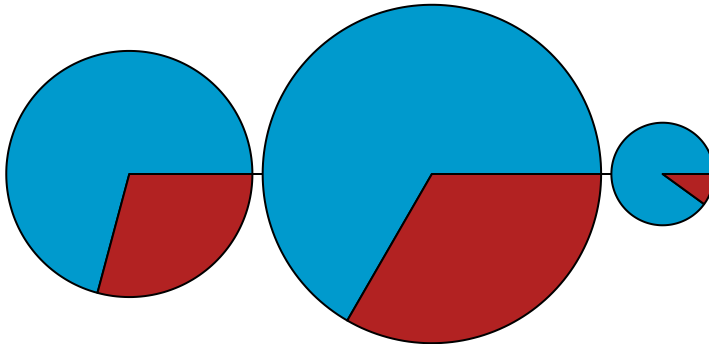

Figure S428. MBPA\_000556318 Stramenopiles

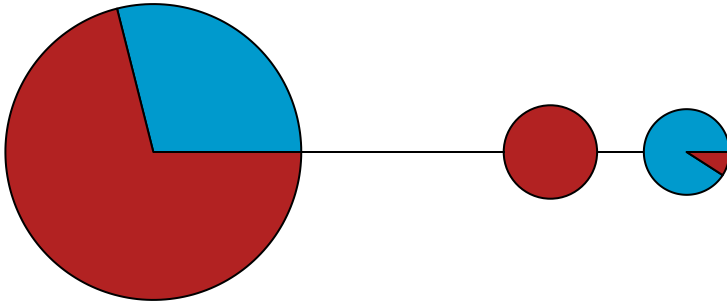

Figure S429. MBPA\_000619797

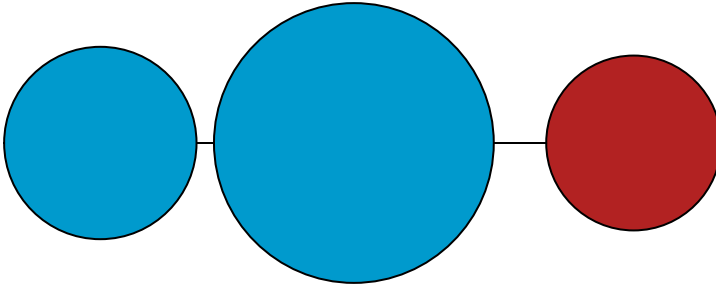

Figure S430. MBPA\_000692213

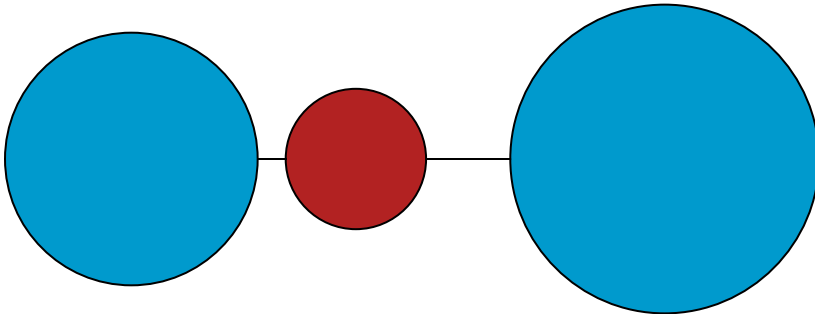

Figure S431. MBPA\_000919505 Metazoa

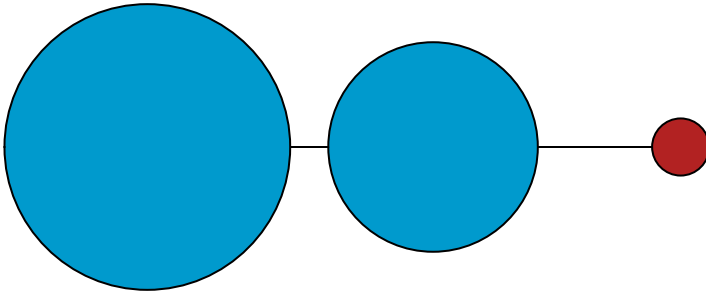



Figure S432. MBPA\_001053177

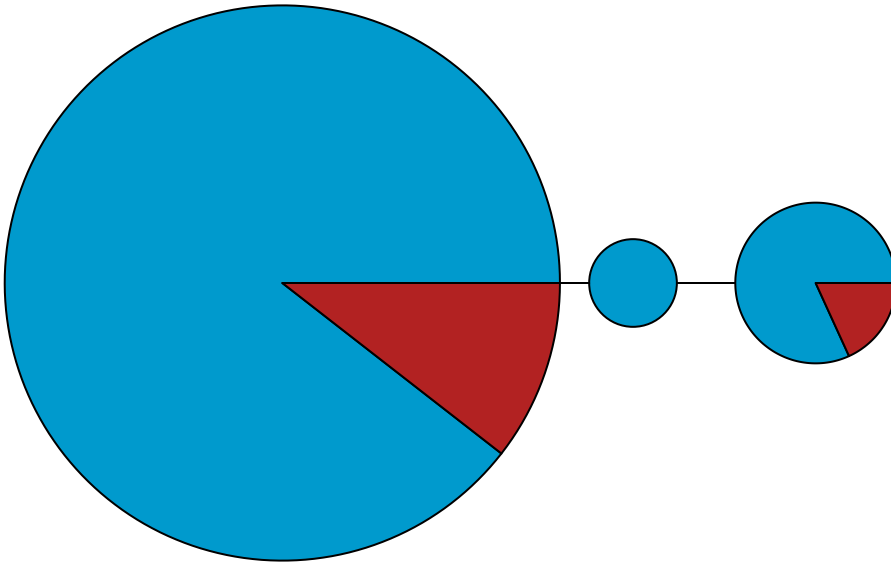

Figure S433. MBPA\_001091579

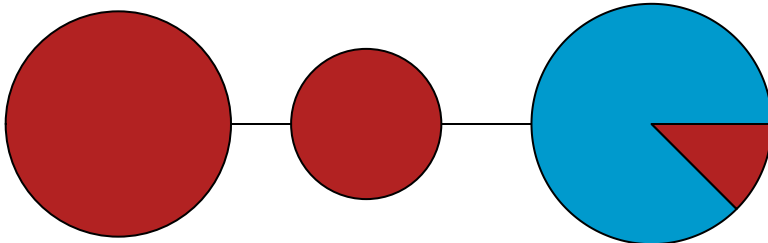

Figure S434. MBPA\_001124203 Stramenopiles

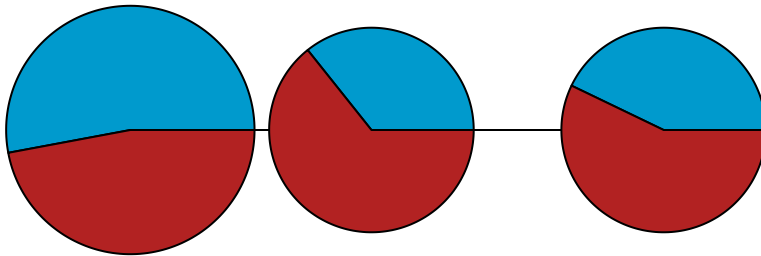

Figure S435. MBPA\_001241510 Stramenopiles

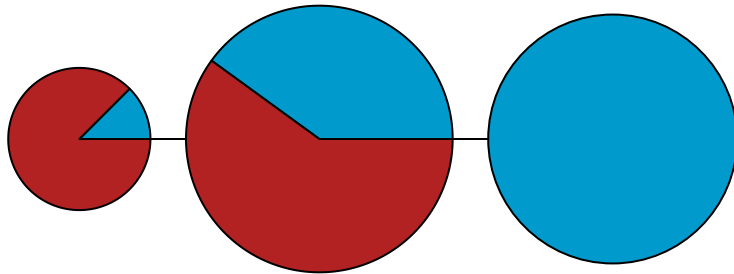

Figure S436. MBPA\_003736101 Metazoa

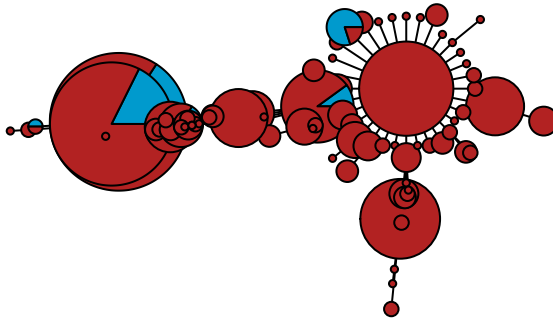

Figure S437. MBPA\_003736115 Metazoa

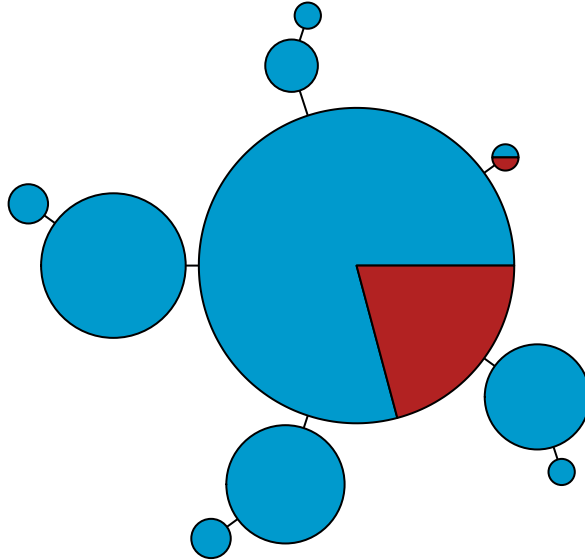

Figure S438. MBPA\_003736743 Metazoa

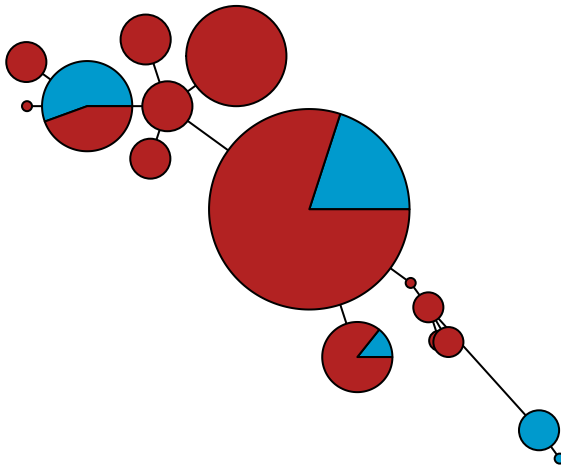

Figure S439. MBPA\_003737888 Metazoa

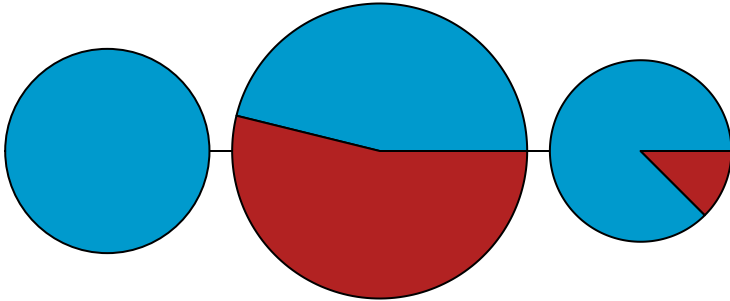



Figure S440. MBPA\_003742170 Metazoa

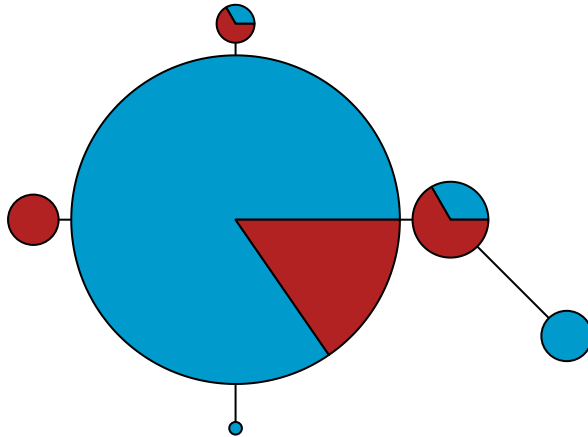

Figure S441. MBPA\_003745411 Metazoa

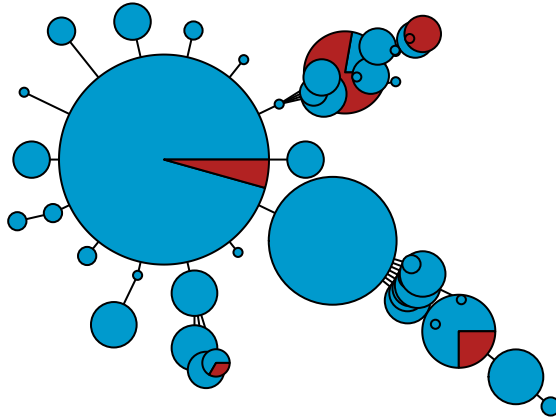

Figure S442. MBPA\_003756087 Metazoa

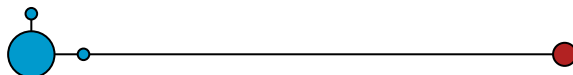

Figure S443. MBPA\_003782205 Metazoa

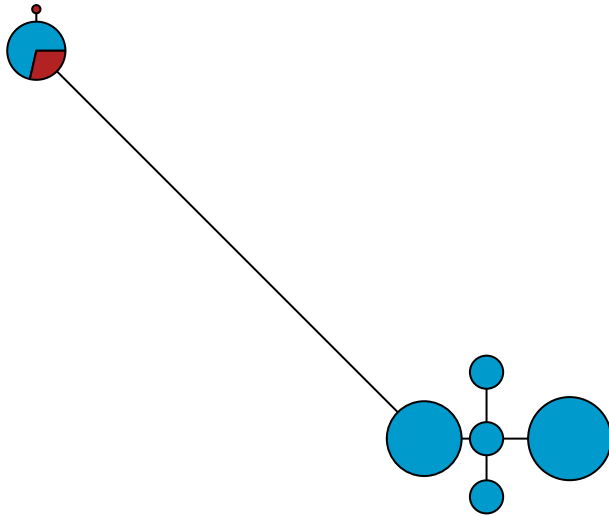

Figure S444. MBPA\_003938994

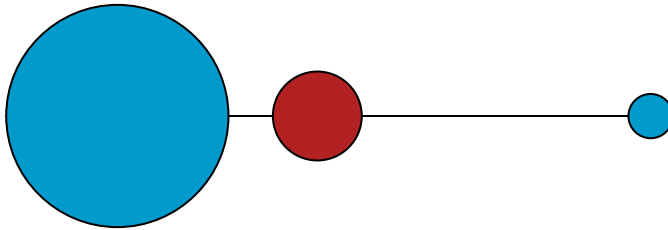

Supplement: EAP-30-e02036-s002.pdf [file EAP-30-e02036-s002.pdf]
