# Supplementary material for: From metabarcoding to metaphylogeography: separating the wheat from the chaff
Source: PubMed Central journal article supplement — Ecol Appl. 2019 Dec 11;30(2):e02036. doi: 10.1002/eap.2036 (PMC7078904; doi:10.1002/eap.2036), 2019-12-11

**Supporting Information.** Xavier Turon, Adrià Antich, Creu Palacín, Kim Præbel, Owen Simon Wangensteen. 2019. From metabarcoding to metaphylogeography: separating the wheat from the chaff. *Ecological Applications*.

Appendix S1.

Figure S1. Map of the Iberian Peninsula showing the two sampling sites in the Cabrera Archipelago (Mediterranean) and Cies Islands (Atlantic). The sampling zone in each site is indicated in yellow. Scale bars measure 1 Km.

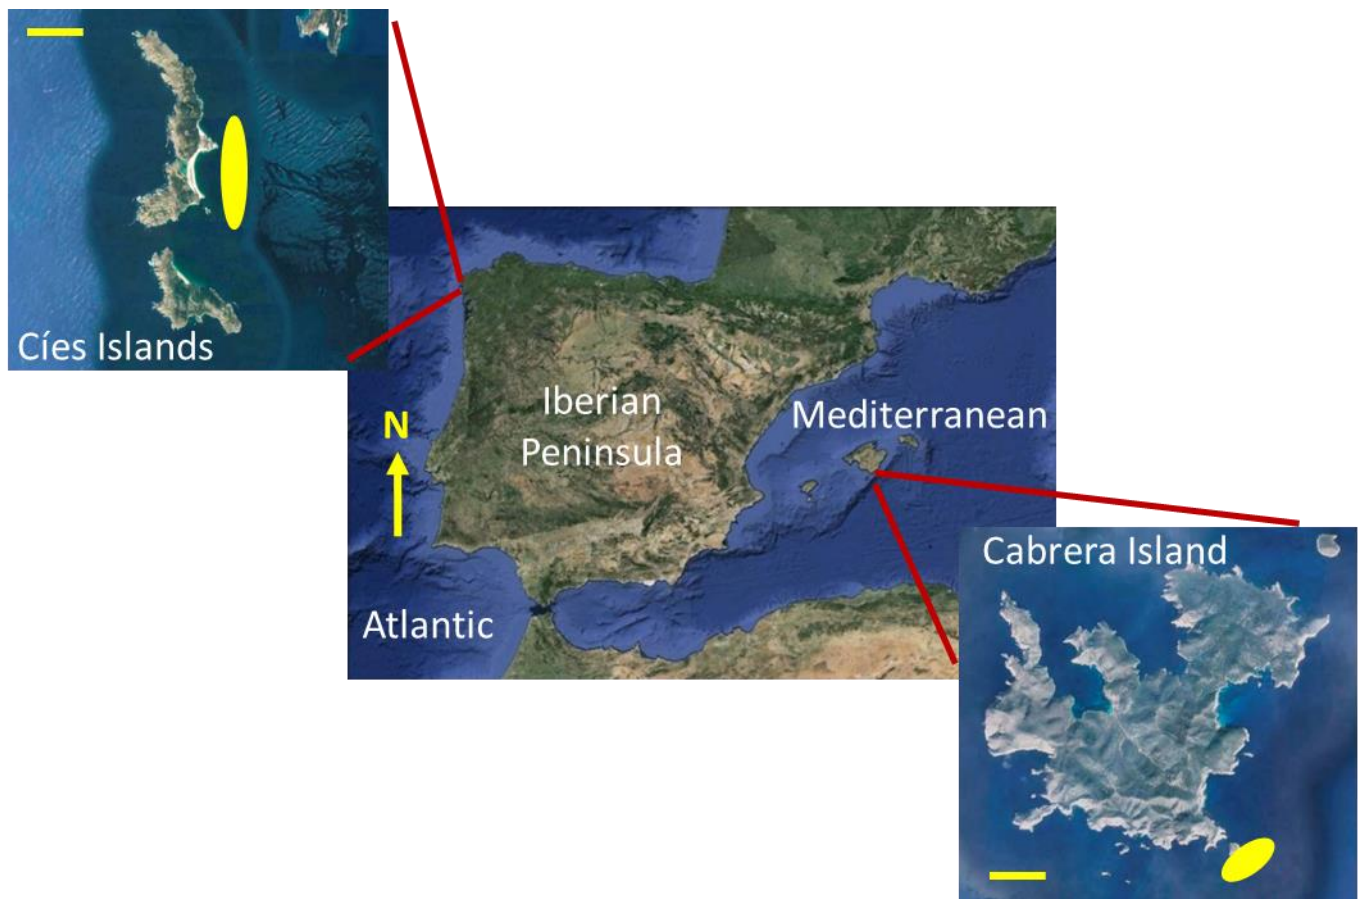

Supplement: EAP-30-e02036-s001.pdf [file EAP-30-e02036-s001.pdf]
