# Supplementary material for: From metabarcoding to metaphylogeography: separating the wheat from the chaff
Source: PubMed Central journal article supplement — Ecol Appl. 2019 Dec 11;30(2):e02036. doi: 10.1002/eap.2036 (PMC7078904; doi:10.1002/eap.2036), 2019-12-11
Supplement: EAP-30-e02036-s005.pdf [file EAP-30-e02036-s005.pdf]

**Xavier Turon, Adrià Antich, Creu Palacín, Kim Præbel, Owen Simon Wangensteen. 2019. From metabarcoding to metaphylogeography: separating the wheat from the chaff. *Ecological Applications*.**

---

## **Data S1**

### **Table of the initial 722 MOTUs used in the study**

---

## **Authors**

Xavier Turon  
Department of Marine Ecology, Centre for Advanced Studies of Blanes (CEAB, CSIC)  
17300 Blanes (Girona). Catalonia. Spain  
xturon@ceab.csic.es

Adrià Antich  
Department of Marine Ecology, Centre for Advanced Studies of Blanes (CEAB, CSIC)  
17300 Blanes (Girona). Catalonia. Spain  
a.antich@ceab.csic.es

Creu Palacín  
Department of Evolutionary Biology, Ecology and Environmental Sciences, and Institute of Biodiversity Research (IRBio), University of Barcelona  
643, Diagonal Ave. 08028 Barcelona, Catalonia, Spain  
cpalacin@ub.edu

Kim Præbel  
Norwegian College of Fishery Science, UiT the Arctic University of Norway  
Hansine Hansens veg 18, Tromsø, Norway  
kim.praebel@uit.no

Owen Simon Wangensteen  
Norwegian College of Fishery Science, UiT the Arctic University of Norway  
Hansine Hansens veg 18, Tromsø, Norway  
owen.wangensteen@uit.no

---

## File list (files found within DataS1.zip)

Data S1.csv

## Description

For each MOTU the following information is provided:

|                           |                                                                                                                            |
|---------------------------|----------------------------------------------------------------------------------------------------------------------------|
| id                        | Identification code of MOTU                                                                                                |
| rank                      | Lowest taxonomic category at which the MOTU was identified                                                                 |
| scientific_name           | Name of taxon assigned                                                                                                     |
| best_identity             | % identity of the best hit found in the reference database                                                                 |
| superkingdom_name         | Name of Superkingdom assigned, if any                                                                                      |
| kingdom_name              | Name of Kingdom assigned, if any                                                                                           |
| phylum_name               | Name of Phylum assigned, if any                                                                                            |
| class_name                | Name of Class assigned, if any                                                                                             |
| order_name                | Name of Order assigned, if any                                                                                             |
| family_name               | Name of Family assigned, if any                                                                                            |
| genus_name                | Name of Genus assigned, if any                                                                                             |
| species_name              | Name of species assigned, if any                                                                                           |
| best_match                | Accession number of the best match in the reference database                                                               |
| taxid                     | Identification number assigned by NCBI Taxonomy                                                                            |
| n_sequences               | Initial number of sequences grouped in the MOTU                                                                            |
| n_sequences_after_denoise | Number of sequences remaining after the denoise procedure.<br>NA indicates that the MOTU has been removed during denoising |
| total_reads               | Total number of reads in the MOTU                                                                                          |
| Columns R to BP           | Sample codes (see below)                                                                                                   |
| seqs                      | Representative sequence of the MOTU                                                                                        |

Sample codes:

| codes                           | park    | year |
|---------------------------------|---------|------|
| LophocladiאלallemandiiCabrera   | Cabrera | 2014 |
| LophocladiאלallemandiiCabrera.1 | Cabrera | 2014 |
| LophocladiאלallemandiiCabrera.2 | Cabrera | 2014 |
| PhotophilicalgaeCabrera         | Cabrera | 2014 |
| PhotophilicalgaeCabrera.1       | Cabrera | 2014 |
| PhotophilicalgaeCabrera.2       | Cabrera | 2014 |
| SciaphilousalgaeCabrera         | Cabrera | 2014 |
| SciaphilousalgaeCabrera.1       | Cabrera | 2014 |
| SciaphilousalgaeCabrera.2       | Cabrera | 2014 |
| DetriticbottomCabrera           | Cabrera | 2014 |

|                                   |         |      |
|-----------------------------------|---------|------|
| DetriticbottomCabrera.1           | Cabrera | 2014 |
| DetriticbottomCabrera.2           | Cabrera | 2014 |
| CaulerpaCabrera                   | Cabrera | 2015 |
| CaulerpaCabrera.1                 | Cabrera | 2015 |
| CaulerpaCabrera.2                 | Cabrera | 2015 |
| DetriticbottomCabrera.3           | Cabrera | 2015 |
| DetriticbottomCabrera.4           | Cabrera | 2015 |
| DetriticbottomCabrera.5           | Cabrera | 2015 |
| PhotophilicalgaeCabrera.3         | Cabrera | 2015 |
| PhotophilicalgaeCabrera.4         | Cabrera | 2015 |
| PhotophilicalgaeCabrera.5         | Cabrera | 2015 |
| LophocladialallemandiiCabrera.3   | Cabrera | 2015 |
| LophocladialallemandiiCabrera.4   | Cabrera | 2015 |
| LophocladialallemandiiCabrera.5   | Cabrera | 2015 |
| SciaphilousalgaeCabrera.3         | Cabrera | 2015 |
| SciaphilousalgaeCabrera.4         | Cabrera | 2015 |
| SciaphilousalgaeCabrera.5         | Cabrera | 2015 |
| CystoseiranodicaulisCiesxxx       | Cies    | 2014 |
| CystoseiranodicaulisCiesxxx.1     | Cies    | 2014 |
| CystoseiranodicaulisCiesxxx.2     | Cies    | 2014 |
| CystoseiratamariscifoliaCiesxxx   | Cies    | 2014 |
| CystoseiratamariscifoliaCiesxxx.1 | Cies    | 2014 |
| CystoseiratamariscifoliaCiesxxx.2 | Cies    | 2014 |
| SciaphilouscommunityCiesxxx       | Cies    | 2014 |
| SciaphilouscommunityCiesxxx.1     | Cies    | 2014 |
| SciaphilouscommunityCiesxxx.2     | Cies    | 2014 |
| MaerlCiesxxx                      | Cies    | 2014 |
| MaerlCiesxxx.1                    | Cies    | 2014 |
| MaerlCiesxxx.2                    | Cies    | 2014 |
| AsparagopsisCiesxxx               | Cies    | 2015 |
| AsparagopsisCiesxxx.1             | Cies    | 2015 |
| AsparagopsisCiesxxx.2             | Cies    | 2015 |
| CystoseiranodicaulisCiesxxx.3     | Cies    | 2015 |
| CystoseiranodicaulisCiesxxx.4     | Cies    | 2015 |
| CystoseiranodicaulisCiesxxx.5     | Cies    | 2015 |
| MaerlCiesxxx.3                    | Cies    | 2015 |
| MaerlCiesxxx.4                    | Cies    | 2015 |
| MaerlCiesxxx.5                    | Cies    | 2015 |
| SciaphilouscommunityCiesxxx.3     | Cies    | 2015 |
| SciaphilouscommunityCiesxxx.4     | Cies    | 2015 |
| SciaphilouscommunityCiesxxx.5     | Cies    | 2015 |

---
