# Supplementary material for: From metabarcoding to metaphylogeography: separating the wheat from the chaff
Source: PubMed Central journal article supplement — Ecol Appl. 2019 Dec 11;30(2):e02036. doi: 10.1002/eap.2036 (PMC7078904; doi:10.1002/eap.2036), 2019-12-11
Supplement: EAP-30-e02036-s006.pdf [file EAP-30-e02036-s006.pdf]

**Xavier Turon, Adrià Antich, Creu Palacín, Kim Præbel, Owen Simon Wangensteen. 2019. From metabarcoding to metaphylogeography: separating the wheat from the chaff. *Ecological Applications*.**

---

## **Data S2**

**Table of the final 563 MOTUs used in the study after the denoising and filtering steps**

---

## **Authors**

Xavier Turon

Department of Marine Ecology, Centre for Advanced Studies of Blanes (CEAB, CSIC)  
17300 Blanes (Girona). Catalonia. Spain  
xturon@ceab.csic.es

Adrià Antich

Department of Marine Ecology, Centre for Advanced Studies of Blanes (CEAB, CSIC)  
17300 Blanes (Girona). Catalonia. Spain  
a.antich@ceab.csic.es

Creu Palacín

Department of Evolutionary Biology, Ecology and Environmental Sciences, and Institute of Biodiversity Research (IRBio), University of Barcelona  
643, Diagonal Ave. 08028 Barcelona, Catalonia, Spain  
cpalacin@ub.edu

Kim Præbel

Norwegian College of Fishery Science, UiT the Arctic University of Norway  
Hansine Hansens veg 18, Tromsø, Norway  
kim.praebel@uit.no

Owen Simon Wangensteen

Norwegian College of Fishery Science, UiT the Arctic University of Norway  
Hansine Hansens veg 18, Tromsø, Norway  
owen.wangensteen@uit.no

---

## File list (files found within DataS2.zip)

Data S2.csv

## Description

|                   |                                                              |
|-------------------|--------------------------------------------------------------|
| id                | Identification code of the MOTU                              |
| rank              | Lowest taxonomic category at which the MOTU was identified   |
| scientific_name   | Name of taxon assigned                                       |
| best_identity     | % identity of the best hit found in the reference database   |
| superkingdom_name | Name of Superkingdom assigned, if any                        |
| kingdom_name      | Name of Kingdom assigned, if any                             |
| phylum_name       | Name of Phylum assigned, if any                              |
| class_name        | Name of Class assigned, if any                               |
| order_name        | Name of Order assigned, if any                               |
| family_name       | Name of Family assigned, if any                              |
| genus_name        | Name of Genus assigned, if any                               |
| species_name      | Name of species assigned, if any                             |
| best_match        | Accession number of the best match in the reference database |
| taxid             | Identification number assigned by NCBI Taxonomy              |
| n_sequences       | Final number of sequences grouped in the MOTU                |
| total_reads       | Final number of reads in the MOTU                            |
| Columns Q to BO   | Sample codes (see below)                                     |
| seqs              | Representative sequence of the MOTU                          |

Sample codes:

| <b>codes</b>                    | <b>park</b> | <b>year</b> |
|---------------------------------|-------------|-------------|
| LophocladialallemandiiCabrera   | Cabrera     | 2014        |
| LophocladialallemandiiCabrera.1 | Cabrera     | 2014        |
| LophocladialallemandiiCabrera.2 | Cabrera     | 2014        |
| PhotophilicalgaeCabrera         | Cabrera     | 2014        |
| PhotophilicalgaeCabrera.1       | Cabrera     | 2014        |
| PhotophilicalgaeCabrera.2       | Cabrera     | 2014        |
| SciaphilousalgaeCabrera         | Cabrera     | 2014        |
| SciaphilousalgaeCabrera.1       | Cabrera     | 2014        |
| SciaphilousalgaeCabrera.2       | Cabrera     | 2014        |
| DetriticbottomCabrera           | Cabrera     | 2014        |
| DetriticbottomCabrera.1         | Cabrera     | 2014        |
| DetriticbottomCabrera.2         | Cabrera     | 2014        |

|                                   |         |      |
|-----------------------------------|---------|------|
| CaulerpaCabrera                   | Cabrera | 2015 |
| CaulerpaCabrera.1                 | Cabrera | 2015 |
| CaulerpaCabrera.2                 | Cabrera | 2015 |
| DetriticbottomCabrera.3           | Cabrera | 2015 |
| DetriticbottomCabrera.4           | Cabrera | 2015 |
| DetriticbottomCabrera.5           | Cabrera | 2015 |
| PhotophilicalgaeCabrera.3         | Cabrera | 2015 |
| PhotophilicalgaeCabrera.4         | Cabrera | 2015 |
| PhotophilicalgaeCabrera.5         | Cabrera | 2015 |
| LophocladialallemandiiCabrera.3   | Cabrera | 2015 |
| LophocladialallemandiiCabrera.4   | Cabrera | 2015 |
| LophocladialallemandiiCabrera.5   | Cabrera | 2015 |
| SciaphilousalgaeCabrera.3         | Cabrera | 2015 |
| SciaphilousalgaeCabrera.4         | Cabrera | 2015 |
| SciaphilousalgaeCabrera.5         | Cabrera | 2015 |
| CystoseiranodicaulisCiesxxx       | Cies    | 2014 |
| CystoseiranodicaulisCiesxxx.1     | Cies    | 2014 |
| CystoseiranodicaulisCiesxxx.2     | Cies    | 2014 |
| CystoseiratamariscifoliaCiesxxx   | Cies    | 2014 |
| CystoseiratamariscifoliaCiesxxx.1 | Cies    | 2014 |
| CystoseiratamariscifoliaCiesxxx.2 | Cies    | 2014 |
| SciaphilouscommunityCiesxxx       | Cies    | 2014 |
| SciaphilouscommunityCiesxxx.1     | Cies    | 2014 |
| SciaphilouscommunityCiesxxx.2     | Cies    | 2014 |
| MaerlCiesxxx                      | Cies    | 2014 |
| MaerlCiesxxx.1                    | Cies    | 2014 |
| MaerlCiesxxx.2                    | Cies    | 2014 |
| AsparagopsisCiesxxx               | Cies    | 2015 |
| AsparagopsisCiesxxx.1             | Cies    | 2015 |
| AsparagopsisCiesxxx.2             | Cies    | 2015 |
| CystoseiranodicaulisCiesxxx.3     | Cies    | 2015 |
| CystoseiranodicaulisCiesxxx.4     | Cies    | 2015 |
| CystoseiranodicaulisCiesxxx.5     | Cies    | 2015 |
| MaerlCiesxxx.3                    | Cies    | 2015 |
| MaerlCiesxxx.4                    | Cies    | 2015 |
| MaerlCiesxxx.5                    | Cies    | 2015 |
| SciaphilouscommunityCiesxxx.3     | Cies    | 2015 |
| SciaphilouscommunityCiesxxx.4     | Cies    | 2015 |
| SciaphilouscommunityCiesxxx.5     | Cies    | 2015 |
